# Supplementary material for: Catalytic asymmetric bromochlorination of aromatic allylic alcohols promoted by multifunctional Schiff base ligands
Source: Royal Society of Chemistry journal article supplement (doi:10.1039/c6ob01306f), 2016-01-01
Supplement: c6ob01306f1.pdf [file c6ob01306f1.pdf]

# Supporting Information

## Catalytic Asymmetric Bromochlorination of Aromatic Allylic Alcohols Promoted by Multifunctional Schiff Base Ligands

Wei-Sheng Huang<sup>a</sup>, Li Chen<sup>a</sup>, Zhan-Jiang Zheng<sup>a</sup>, Ke-Fang Yang<sup>\*a</sup>, Zheng Xu<sup>a</sup>,  
Yu-Ming Cui<sup>a</sup>, Li-Wen Xu<sup>\*a,b</sup>

<sup>a</sup>Key Laboratory of Organosilicon Chemistry and Material Technology of Ministry of Education,  
Hangzhou Normal University, P. R. China

<sup>b</sup>State Key Laboratory for Oxo Synthesis and Selective Oxidation, Lanzhou Institute of Chemical  
Physics, Chinese Academy of Sciences, P. R. China

### Table of Contents

|                                                                                                                                       |    |
|---------------------------------------------------------------------------------------------------------------------------------------|----|
| 1                                                                                                                                     |    |
| General Methods .....                                                                                                                 | 2  |
| Preparation and Characterization of Ligands.....                                                                                      | 3  |
| General Procedure for the Preparation of Allyl Alcohols <sup>[4]</sup> .....                                                          | 11 |
| General Procedure for the Preparation of Bromochloroalcohols / Synthesis and<br>Characterization of the Products .....                | 12 |
| References.....                                                                                                                       | 21 |
| Table S1. Frontier orbital energy (in eV) calculated at B3LYP / 6-31G(d,p) level of<br>theory.....                                    | 22 |
| Figure S2. Nonlinear effects in Schiff base L-B1 -promoted bromochlorination of<br>allylic alcohol 1a.....                            | 24 |
| Figure S3. <sup>1</sup> H NMR and <sup>13</sup> C NMR spectrum for the comparison of dibromide,<br>dichloride, and bromochloride..... | 25 |
| NMR spectra for Ligand.....                                                                                                           | 26 |
| NMR spectra for Di-halide Products. ....                                                                                              | 46 |
| HPLC spectra .....                                                                                                                    | 61 |
| Mass spectrum of Di-halide Products.....                                                                                              | 82 |
| PS.....                                                                                                                               | 90 |

## General Methods

All reactions and manipulations were performed using standard Schlenk techniques. All amino alcohols were commercially available and used without further purification. All the allyl alcohols were prepared according to the literature procedures. Flash column chromatography was performed over silica (200-300 mesh). **L1**<sup>[1]</sup>, **L2-L6**<sup>[2]</sup>, **L8** and **L9**<sup>[3]</sup>, were prepared according to literature method or under the modified reaction conditions. <sup>1</sup>HNMR, <sup>13</sup>CNMR and <sup>19</sup>FNMR were respectively recorded at 400 or 500 MHz, 101 or 126 MHz, and 376 or 471 MHz respectively, and <sup>31</sup>P NMR were respectively recorded at 202 MHz respectively on Advance (Bruker). HPLC was carried out with a Agilent Technologies 1260 Infinity system equipped with a photodiode array detector. High Resolution Mass Spectra (ESI-HRMS) were operated on a micro TOF-Q II (Bruker). IR spectra were recorded using a FTIR apparatus (Nicolot 5700). Melting point was recorded by X-4 Optimelt (Shanghai optical instrument factory). Optical rotation was determined by SGW-3 Digital Automatic Polarimeter.

## Preparation and Characterization of Ligands

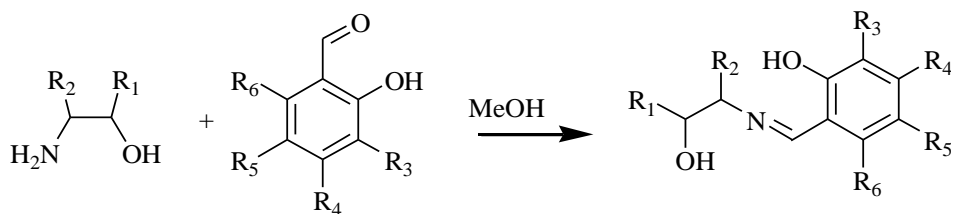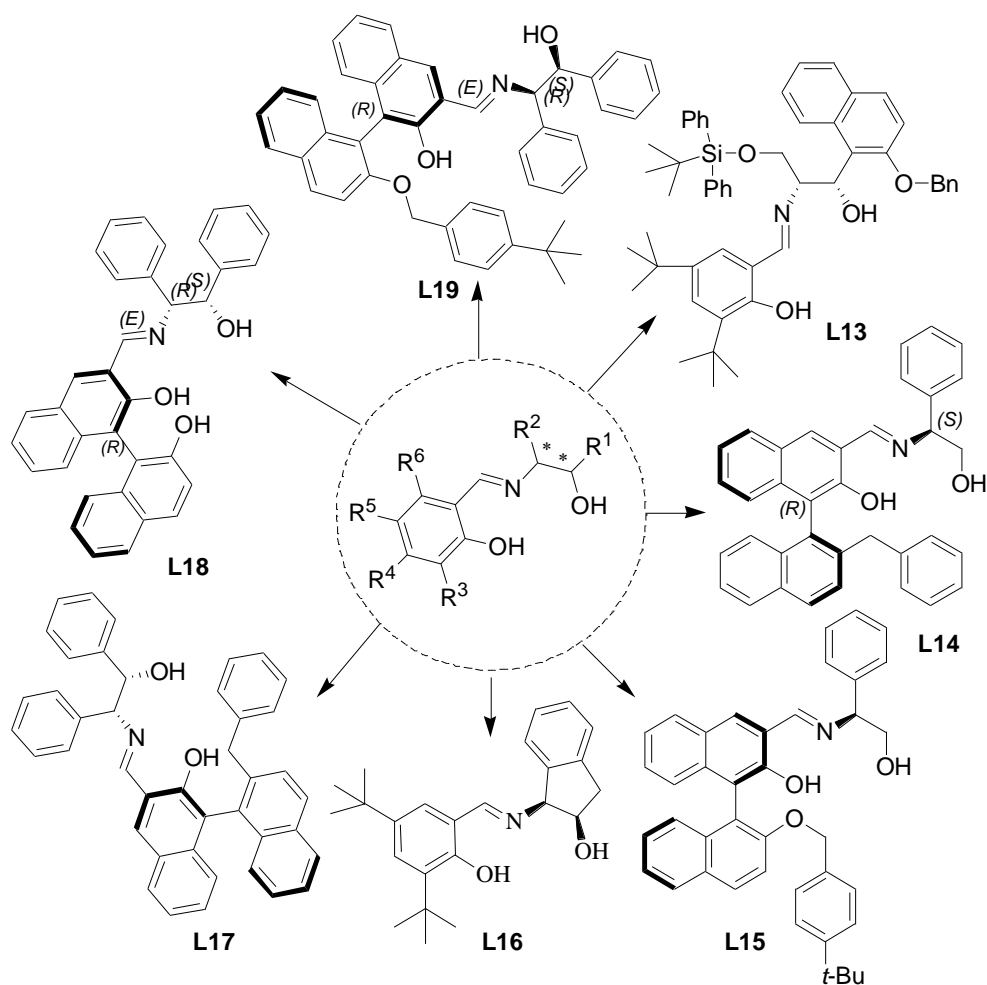

**L20:**  $R^1 = R^4 = R^6 = H$ ,  $R^2 = Ph$ ,  $R^3 = R^5 = t-Bu$

**L21:**  $R^1 = R^2 = Ph$ ,  $R^4 = R^6 = H$ ,  $R^3 = Si(i-Pr)_3$ ,  $R^5 = Me$

**L22:**  $R^1 = R^2 = Ph$ ,  $R^4 = R^6 = H$ ,  $R^3 = TBS$ ,  $R^5 = Me$

**L23:**  $R^1 = R^2 = Ph$ ,  $R^4 = R^6 = R^5 = H$ ,  $R^3 = CH_2TMS$

**L24:**  $R^1 = R^2 = Ph$ ,  $R^3 = R^4 = R^6 = H$ ,  $R^5 = F$

**L25:**  $R^1 = R^2 = Ph$ ,  $R^4 = R^6 = R^5 = H$ ,  $R^3 = Me$

**L26:**  $R^1 = R^2 = Ph$ ,  $R^4 = R^6 = H$ ,  $R^5 = F$ ,  $R^3 = Me$

**L27:**  $R^1 = R^2 = Ph$ ,  $R^4 = R^6 = H$ ,  $R^5 = F$ ,  $R^3 = Br$

**L28:**  $R^1 = R^2 = Ph$ ,  $R^3 = R^4 = R^5 = R^6 = H$

**L29:**  $R^1 = R^2 = Ph$ ,  $R^3 = R^4 = R^6 = H$ ,  $R^5 = Cl$

**L30:**  $R^1 = R^2 = Ph$ ,  $R^4 = R^6 = H$ ,  $R^5 = Br$ ,  $R^3 = t-Bu$

**L-B1:**  $R^1 = R^2 = Ph$ ,  $R^4 = R^6 = H$ ,  $R^5 = R^3 = t-Bu$

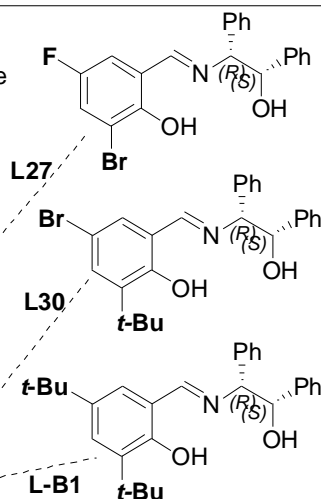

Aldehyde or its analogues (3.0 mmol) was added to a solution of commercial available amino alcohol (3.0 mmol) in MeOH (20 mL), and the solution was heated to 70 °C with stirring for 5 min. Then the solution was cooled to room temperature and stirred overnight. The mixture was washed with water and extracted with DCM, and the combined organic layers were dried over anhydrous Na<sub>2</sub>SO<sub>4</sub>, and was concentrated in vacuo and purified by flash column chromatography (silica gel, hexanes:EtOAc = 6:1) to afford a brittle yellow solid.

**L-B1**, yield: 76%; Orange solid; HRMS (ESI) Calcd for [C<sub>29</sub>H<sub>36</sub>NO<sub>2</sub>, M+H]<sup>+</sup>, 430.2741; Found: 430.2750 ;

<sup>1</sup>H NMR (400 MHz, CDCl<sub>3</sub>): δ(ppm) = 13.39 (s, 1H), 8.15 (s, 1H), 7.42–7.18 (m, 13H), 6.93 (d, J = 2.3 Hz, 1H), 5.08 (d, J = 6.6 Hz, 1H), 4.52 (d, J = 6.7 Hz, 1H), 2.13 (s, 1H), 1.45 (d, J = 1.5 Hz, 9H), 1.25 (d, J = 1.5 Hz, 9H).

<sup>13</sup>C NMR (101 MHz, CDCl<sub>3</sub>) δ(ppm) = 167.1, 157.9, 140.3, 128.6, 128.2, 127.8, 127.2, 126.3, 117.9, 80.0, 77.3, 76.7, 35.1, 34.1, 31.4, 29.4.

**L7**, yield: 76%; Orange solid; HRMS (ESI) Calcd for [C<sub>25</sub>H<sub>27</sub>ClNO<sub>2</sub>, M+H]<sup>+</sup>, 408.1725; Found: 408.1718;

<sup>1</sup>H NMR (400 MHz, CDCl<sub>3</sub>): δ(ppm) = 13.68 (s, 1H), 7.94 (s, 1H), 7.34 (d, J = 4.1 Hz, 4H), 7.29 (dd, J = 8.8, 4.6 Hz, 1H), 7.22 (dd, J = 7.2, 2.0 Hz, 4H), 7.18 (dd, J = 6.3, 3.5 Hz, 2H), 6.87 (d, J = 2.5 Hz, 1H), 4.97 (d, J = 6.8 Hz, 1H), 4.45 (d, J = 6.8 Hz, 1H), 2.20 (s, 1H), 1.41 (s, 9H).

<sup>13</sup>C NMR (101 MHz, CDCl<sub>3</sub>): δ(ppm) = 165.5, 159.0, 140.1, 139.7, 139.2, 129.9, 128.8, 128.2, 127.3, 122.7, 119.3, 80.2, 78.4, 35.2, 29.2.

**L13**, yield: 75%; Orange solid; HRMS (ESI) Calcd for [C<sub>51</sub>H<sub>60</sub>NO<sub>4</sub>Si, M+H]<sup>+</sup>, 778.4281; Found: 778.4286;

<sup>1</sup>H NMR (400 MHz, CDCl<sub>3</sub>): δ(ppm) = 8.23 (d, J = 8.1 Hz, 1H), 8.06 (s, 1H), 7.75 (dd, J = 21.1, 8.5 Hz, 2H), 7.51 (dd, J = 23.6, 7.4 Hz, 5H), 7.42 – 7.27 (m, 11H), 7.21 (dt, J = 18.7, 7.1 Hz, 6H), 6.94 (s, 1H), 6.05 (t, J = 6.5 Hz, 1H), 5.13 (dd, J = 35.3,

12.1 Hz, 2H), 3.96 (s, 1H), 3.89 (s, 1H), 3.75 (dd,  $J = 9.8, 6.4$  Hz, 1H), 1.45 (s, 9H), 1.30 (s, 9H), 1.01 (s, 9H);

$^{13}\text{C}$  NMR (101 MHz,  $\text{CDCl}_3$ ):  $\delta(\text{ppm}) = 168.3, 158.2, 154.8, 136.8, 135.7, 133.3, 132.2, 130.1, 129.7, 128.9, 128.2, 127.7, 127.5, 127.1, 126.9, 124.0, 121.4, 118.3, 114.6, 75.5, 71.5, 69.5, 64.7, 35.2, 34.3, 31.6, 29.7, 26.9, 19.3.$

**L14**, yield: 76%; Orange solid; HRMS (ESI) Calcd for  $[\text{C}_{36}\text{H}_{29}\text{NNaO}_2, \text{M}+\text{Na}]^+$ , 530.2062; Found: 530.2091;

$^1\text{H}$  NMR (400 MHz,  $\text{CDCl}_3$ ):  $\delta(\text{ppm}) = 12.72$  (s, 1H), 8.73 (s, 1H), 8.08 (s, 1H), 7.89 (t,  $J = 8.0$  Hz, 3H), 7.48 (d,  $J = 8.5$  Hz, 1H), 7.37 – 7.18 (m, 12H), 7.10 – 7.04 (m, 2H), 7.01 (d,  $J = 7.9$  Hz, 2H), 6.91 (d,  $J = 6.2$  Hz, 3H), 4.56 (s, 1H), 3.88 (t,  $J = 7.6$  Hz, 2H), 3.82 (s, 1H), 3.75 (s, 1H), 2.03 (s, 1H).

$^{13}\text{C}$  NMR (101 MHz,  $\text{CDCl}_3$ ):  $\delta: 166.4, 154.4, 141.1, 139.1, 138.4, 135.6, 133.9, 133.2, 132.7, 132.1, 129.4, 128.9, 128.7, 128.5, 127.9, 127.4, 126.3, 125.6, 125.4, 125.0, 123.6, 120.8, 119.8, 76.3, 67.7, 40.1.$

**L15**, yield: 78%; Orange solid; HRMS (ESI) Calcd for  $[\text{C}_{40}\text{H}_{38}\text{NO}_3, \text{M}+\text{H}]^+$ , 580.2846; Found: 580.2841;

$^1\text{H}$  NMR (400 MHz,  $\text{CDCl}_3$ ):  $\delta(\text{ppm}) = 12.90$  (s, 1H), 8.70 (d,  $J = 7.0$  Hz, 1H), 7.95 – 7.89 (m, 2H), 7.85 (d,  $J = 7.9$  Hz, 2H), 7.48 (d,  $J = 5.7$  Hz, 1H), 7.39 – 7.19 (m, 12H), 7.16 – 7.09 (m, 3H), 6.92 (dd,  $J = 16.4, 5.5$  Hz, 2H), 5.06 (d,  $J = 5.7$  Hz, 2H), 4.48 (dd,  $J = 11.6, 5.1$  Hz, 1H), 3.83 (dd,  $J = 11.7, 6.5$  Hz, 2H), 1.27 – 1.18 (m, 9H).

$^{13}\text{C}$  NMR (101 MHz,  $\text{CDCl}_3$ ):  $\delta(\text{ppm}) = 166.7, 154.5, 150.5, 139.2, 135.9, 134.6, 134.0, 129.8, 129.0, 128.2, 127.6, 127.4, 126.9, 126.6, 125.7, 125.0, 124.0, 123.5, 120.9, 120.2, 117.7, 116.3, 76.5, 71.4, 67.7, 34.5, 31.4 .$

**L16**, yield: 78%; Orange solid; HRMS (ESI) Calcd for  $[\text{C}_{24}\text{H}_{32}\text{NO}_2, \text{M}+\text{H}]^+$ , 366.2428; Found: 366.2439;

$^1\text{H}$  NMR (400 MHz,  $\text{CDCl}_3$ ):  $\delta(\text{ppm}) = 13.13$  (s, 1H), 8.60 (s, 1H), 7.42 (d,  $J = 2.3$  Hz, 1H), 7.28 (d,  $J = 6.9$  Hz, 2H), 7.24 – 7.12 (m, 3H), 4.78 (d,  $J = 5.3$  Hz, 1H), 4.66 (q,

$J = 5.3$  Hz, 1H), 3.16 (ddd,  $J = 20.8, 15.9, 5.4$  Hz, 2H), 2.22 (s, 1H), 1.41 (s, 9H), 1.32 (s, 9H).

$^{13}\text{C}$  NMR (101 MHz,  $\text{CDCl}_3$ ):  $\delta(\text{ppm}) = 168.4, 158.2, 141.0, 140.6, 137.1, 128.6, 127.8, 127.2, 126.6, 125.6, 125.1, 118.0, 75.8, 75.3, 39.8, 35.2, 34.3, 31.6, 29.6$ .

**L17**, yield: 71%; Orange solid; HRMS (ESI) Calcd for  $[\text{C}_{42}\text{H}_{33}\text{NO}_2, \text{M}+\text{H}]^+$ , 584.2590; Found: 584.2653;

$^1\text{H}$  NMR (400 MHz,  $\text{CDCl}_3$ ):  $\delta(\text{ppm}) = 12.80$  (d,  $J = 2.0$  Hz, 1H), 8.21 (s, 1H), 7.89 (dd,  $J = 8.5, 2.8$  Hz, 2H), 7.76 (d,  $J = 7.8$  Hz, 1H), 7.72 (s, 1H), 7.49 – 7.16 (m, 17H), 7.05 – 6.97 (m, 3H), 6.92 (dd,  $J = 13.8, 7.5$  Hz, 3H), 4.94 (dd,  $J = 7.3, 1.9$  Hz, 1H), 4.44 (d,  $J = 7.3$  Hz, 1H), 3.73 (s, 2H), 2.06 (s, 1H).

$^{13}\text{C}$  NMR (101 MHz,  $\text{CDCl}_3$ ):  $\delta(\text{ppm}) = 165.7, 154.4, 141.0, 140.4, 139.4, 138.6, 135.6, 133.8, 133.2, 132.7, 132.1, 129.3, 128.9, 128.6, 128.5, 128.0, 127.4, 127.2, 126.2, 125.7, 125.4, 124.9, 123.5, 120.7, 119.6, 81.3, 78.5, 77.5, 77.2, 76.8, 40.0$ .

**L18**, yield: 76%; Orange solid; HRMS (ESI) Calcd for  $[\text{C}_{35}\text{H}_{28}\text{NO}_3, \text{M}+\text{H}]^+$ , 510.2064; Found: 510.2073 ;

$^1\text{H}$  NMR (400 MHz,  $\text{CDCl}_3$ ):  $\delta(\text{ppm}) = 13.19$  (s, 1H), 8.30 (s, 1H), 7.95 (d,  $J = 8.9$  Hz, 1H), 7.89 (d,  $J = 8.2$  Hz, 1H), 7.85 – 7.77 (m, 2H), 7.48 – 7.39 (m, 3H), 7.35 – 7.17 (m, 12H), 7.06 (d,  $J = 8.5$  Hz, 1H), 5.25 (s, 1H), 5.02 (d,  $J = 7.2$  Hz, 1H), 4.54 (d,  $J = 7.2$  Hz, 1H), 2.19 (s, 1H).

$^{13}\text{C}$  NMR (101 MHz,  $\text{CDCl}_3$ ):  $\delta(\text{ppm}) = 165.7, 155.4, 151.7, 140.2, 139.2, 135.6, 135.0, 133.7, 130.2, 129.4, 129.3, 128.7, 128.5, 128.1, 127.8, 127.2, 126.6, 125.0, 124.1, 123.4, 120.9, 117.9, 114.6, 113.8, 81.1, 78.4$ .

**L19**, yield: 72%; Orange solid; HRMS (ESI) Calcd for  $[\text{C}_{46}\text{H}_{41}\text{NO}_3, \text{M}+\text{H}]^+$ , 656.3165; Found: 656.3258;

$^1\text{H}$  NMR (400 MHz,  $\text{CDCl}_3$ ):  $\delta(\text{ppm}) = 12.87$  (s, 1H), 8.23 (s, 1H), 7.93 (d,  $J = 9.0$  Hz, 1H), 7.87 (d,  $J = 7.9$  Hz, 1H), 7.75 (d,  $J = 7.3$  Hz, 1H), 7.69 (s, 1H), 7.43 (dd,  $J = 16.1, 8.3$  Hz, 3H), 7.37 – 7.15 (m, 14H), 7.13 (s, 1H), 7.04 – 6.97 (m, 2H), 6.89 (d,  $J = 8.2$

Hz, 2H), 5.00 (s, 2H), 4.96 (d,  $J = 6.7$  Hz, 1H), 4.45 (d,  $J = 7.3$  Hz, 1H), 2.08 (s, 1H), 1.17 (d,  $J = 3.2$  Hz, 9H).

$^{13}\text{C}$  NMR (101 MHz,  $\text{CDCl}_3$ ):  $\delta(\text{ppm}) = 165.98, 154.5, 150.2, 140.4, 139.4, 135.7, 134.5, 134.0, 133.7, 129.7, 128.8, 128.2, 127.4, 127.2, 126.8, 126.4, 125.5, 125.1, 123.9, 123.3, 120.7, 120.0, 117.5, 116.3, 81.3, 78.4, 71.3, 34.4, 31.4$ .

**L20**, yield: 70 %; Orange thick liquid; HRMS (ESI) Calcd for  $[\text{C}_{23}\text{H}_{32}\text{NO}_2, \text{M}+\text{H}]^+$ , 354.2428; Found: 354.2437 ;

$^1\text{H}$  NMR (400 MHz,  $\text{CDCl}_3$ ):  $\delta(\text{ppm}) = 13.50$  (s, 1H), 8.50 (s, 1H), 7.45 – 7.24 (m, 6H), 7.12 (s, 1H), 4.45 (dd,  $J = 7.6, 5.4$  Hz, 1H), 4.03 – 3.84 (m, 2H), 1.89 (s, 1H), 1.46 (d,  $J = 1.7$  Hz, 9H), 1.30 (d,  $J = 1.8$  Hz, 9H).

$^{13}\text{C}$  NMR (101 MHz,  $\text{CDCl}_3$ ):  $\delta(\text{ppm}) = 167.8, 158.1, 140.6, 136.9, 128.9, 128.0, 127.6, 127.3, 126.6, 118.0, 76., 67.9, 35.2, 34.3, 31.6, 29.6$ .

**L21**, yield: 73%; Orange solid; HRMS (ESI) Calcd for  $[\text{C}_{35}\text{H}_{28}\text{NO}_3, \text{M}+\text{H}]^+$ , 488.2979; Found: 488.2980 ;

$^1\text{H}$  NMR (400 MHz,  $\text{CDCl}_3$ ):  $\delta(\text{ppm}) = 12.83$  (s, 1H), 8.07 (s, 1H), 7.40 – 7.26 (m, 5H), 7.22 (d,  $J = 10.1$  Hz, 6H), 6.91 (s, 1H), 5.06 (d,  $J = 6.6$  Hz, 1H), 4.50 (d,  $J = 6.7$  Hz, 1H), 2.22 (s, 3H), 1.18 – 1.07 (m, 18H).

$^{13}\text{C}$  NMR (101 MHz,  $\text{CDCl}_3$ ):  $\delta(\text{ppm}) = 166.5, 164.2, 140.3, 133.2, 128.8, 128.2, 127.3, 117.5, 80.1, 78.4, 20.6, 19.2, 11.8$ .

**L22**, yield: 71%; Orange solid; HRMS (ESI) Calcd for  $[\text{C}_{35}\text{H}_{28}\text{NO}_3, \text{M}+\text{H}]^+$ , 446.2510; Found: 446.2501;

$^1\text{H}$  NMR (400 MHz,  $\text{CDCl}_3$ )  $\delta$ : 12.84 (s, 1H), 8.05 (s, 1H), 7.46 – 7.13 (m, 12H), 6.89 (s, 1H), 5.04 (d,  $J = 6.7$  Hz, 1H), 4.49 (d,  $J = 6.7$  Hz, 1H), 2.21 (s, 3H), 0.93 (s, 9H), 0.33 (dd,  $J = 4.4, 2.2$  Hz, 6H).

$^{13}\text{C}$  NMR (101 MHz,  $\text{CDCl}_3$ ):  $\delta(\text{ppm}) = 166.5, 163.9, 140.3, 133.4, 128.8, 128.1, 127.3, 127.0, 125.1, 117.5, 80.0, 78.4, 27.3, 20.5, 17.8, -4.6$ .

**L23**, yield: 71 %; Orange thick liquid; HRMS (ESI) Calcd for  $[C_{25}H_{30}NO_2Si, M+H]^+$ , 404.2040; Found: 404.2049;

$^1H$  NMR (400 MHz,  $CDCl_3$ ):  $\delta$ (ppm) =13.21 (s, 1H), 7.99 (s, 1H), 7.43 – 7.09 (m, 10H), 7.02 – 6.89 (m, 1H), 6.78 (dd,  $J = 7.6, 1.2$  Hz, 1H), 6.65 (t,  $J = 7.5$  Hz, 1H), 4.96 (d,  $J = 7.0$  Hz, 1H), 4.42 (d,  $J = 7.0$  Hz, 1H), 2.33 – 1.95 (m, 3H), -0.00 (s, 9H).

$^{13}C$  NMR (101 MHz,  $CDCl_3$ ):  $\delta$ (ppm) =166.3, 158.0, 140.3, 139.8, 132.4, 128.8, 128.1, 127.3, 118.1, 80.4, 78.6, 19.9, -1.4.

**L24**, yield: 71%; Orange solid; HRMS (ESI) Calcd for  $[C_{21}H_{19}FNO_2, M+H]^+$ , 336.1394; Found: 336.1418;

$^1H$  NMR (400 MHz,  $CDCl_3$ ):  $\delta$ (ppm) =12.85 (s, 1H), 7.97 (s, 1H), 7.37 (d,  $J = 4.0$  Hz, 4H), 7.30 – 7.20 (m, 6H), 7.02 – 6.92 (m, 1H), 6.87 (dd,  $J = 9.0, 4.5$  Hz, 1H), 6.76 (dd,  $J = 8.4, 3.1$  Hz, 1H), 5.03 (d,  $J = 7.1$  Hz, 1H), 4.51 (d,  $J = 7.1$  Hz, 1H), 2.06 (s, 1H).

$^{13}C$  NMR (101 MHz,  $CDCl_3$ ):  $\delta$ (ppm) =165.0, 157.2, 156.7, 154.3, 140.2, 139.3, 129.0, 128.3, 127.3, 119.8, 119.6, 118.5, 118.1, 116.9, 116.7, 80.4, 78.5, 77.4.

**L25**, yield: 71%; Orange solid; HRMS (ESI) Calcd for  $[C_{22}H_{22}NO_2, M+H]^+$ , 332.1645; Found: 332.1655;

$^1H$  NMR (400 MHz,  $CDCl_3$ ):  $\delta$ (ppm) =13.34 (s, 1H), 8.02 (s, 1H), 7.37 (dt,  $J = 14.9, 7.5$  Hz, 4H), 7.32 – 7.21 (m, 6H), 7.14 (d,  $J = 7.3$  Hz, 1H), 6.90 (d,  $J = 7.5$  Hz, 1H), 6.71 (t,  $J = 7.5$  Hz, 1H), 5.02 (d,  $J = 7.1$  Hz, 1H), 4.47 (d,  $J = 7.1$  Hz, 1H), 2.27 (s, 3H), 2.07 (s, 1H).

$^{13}C$  NMR (101 MHz,  $CDCl_3$ ):  $\delta$ (ppm) =166.3, 159.3, 140.4, 139.7, 133.7, 129.5, 128.9, 128.5, 128.1, 127.3, 126.0, 118.3, 118.1, 80.5, 78.5, 15.6.

**L26**, yield: 71%; Orange solid; HRMS (ESI) Calcd for  $[C_{22}H_{21}FNO_2, M+H]^+$ , 350.1551; Found: 350.1569;

$^1H$  NMR (400 MHz,  $CDCl_3$ ):  $\delta$ (ppm) =13.11 (s, 1H), 7.92 (s, 1H), 7.50 – 7.17 (m, 11H), 6.87 (dd,  $J = 9.0, 3.0$  Hz, 1H), 6.58 (dd,  $J = 8.3, 3.0$  Hz, 1H), 4.99 (d,  $J = 7.1$  Hz, 1H), 4.46 (d,  $J = 7.1$  Hz, 1H), 2.25 (s, 3H), 2.12 (s, 1H).



$^{13}\text{C}$  NMR (101 MHz,  $\text{CDCl}_3$ ):  $\delta(\text{ppm}) = 165.2, 156.2, 155.5, 153.8, 140.2, 139.4, 128.9, 128.5, 128.1, 127.9, 127.3, 120.8, 120.5, 117.5, 114.1, 113.9, 80.5, 78.4, 15.7$ .

**L27**, yield: 70%; Orange thick liquid; HRMS (ESI) Calcd for  $[\text{C}_{21}\text{H}_{18}\text{BrFNO}_2, \text{M}+\text{H}]^+$ , 414.0499; Found: 414.0524;

$^1\text{H}$  NMR (400 MHz,  $\text{CDCl}_3$ ):  $\delta(\text{ppm}) = 13.92$  (s, 1H), 7.89 (s, 1H), 7.46 – 7.20 (m, 12H), 6.75 (dd,  $J = 8.0, 2.9$  Hz, 1H), 5.01 (d,  $J = 7.2$  Hz, 1H), 4.50 (d,  $J = 7.2$  Hz, 1H), 2.08 (s, 1H).

$^{13}\text{C}$  NMR (101 MHz,  $\text{CDCl}_3$ ):  $\delta(\text{ppm}) = 164.1, 154.5, 153.3, 139.8, 138.7, 128.9, 128.3, 128.0, 127.1, 123.3, 123.0, 118.4, 116.2, 116.0, 115.8, 110.7, 80.1, 76.7$ .

**L28**, yield: 72%; Orange solid; HRMS (ESI) Calcd for  $[\text{C}_{21}\text{H}_{20}\text{NO}_2, \text{M}+\text{H}]^+$ , 318.1489; Found: 318.1500 ;

$^1\text{H}$  NMR (400 MHz,  $\text{CDCl}_3$ ):  $\delta(\text{ppm}) = 13.14$  (s, 1H), 8.06 (s, 1H), 7.48 – 7.24 (m, 11H), 7.06 (s, 1H), 6.92 (s, 1H), 6.80 (t,  $J = 6.9$  Hz, 1H), 5.03 (d,  $J = 6.9$  Hz, 1H), 4.51 (d,  $J = 7.0$  Hz, 1H), 2.11 (s, 1H).

$^{13}\text{C}$  NMR (101 MHz,  $\text{CDCl}_3$ ):  $\delta(\text{ppm}) = 166.1, 161.0, 140.3, 132.7, 131.8, 128.9, 128.4, 128.0, 127.3, 118.8, 117.1, 80.3, 78.5$ .

**L29**, yield: 75%; Orange solid; HRMS (ESI) Calcd for  $[\text{C}_{21}\text{H}_{19}\text{ClNO}_2, \text{M}+\text{H}]^+$ , 352.1099; Found: 352.1091;

$^1\text{H}$  NMR (400 MHz,  $\text{CDCl}_3$ ):  $\delta(\text{ppm}) = 13.11$  (s, 1H), 7.93 (s, 1H), 7.36 – 7.16 (m, 11H), 7.00 (d,  $J = 2.4$  Hz, 1H), 6.84 (d,  $J = 8.8$  Hz, 1H), 4.98 (d,  $J = 7.0$  Hz, 1H), 4.48 (d,  $J = 7.1$  Hz, 1H), 2.18 (s, 1H).

$^{13}\text{C}$  NMR (101 MHz,  $\text{CDCl}_3$ ):  $\delta(\text{ppm}) = 164.8, 159.6, 140.1, 139.2, 132.4, 130.8, 128.9, 128.2, 127.2, 123.3, 119.5, 118.6, 80.1, 78.3$ .

**L30**, yield: 73%; Orange solid; HRMS (ESI) Calcd for  $[\text{C}_{25}\text{H}_{26}\text{BrNO}_2, \text{M}+\text{H}]^+$ , 452.1147; Found: 452.1239 ;

$^1\text{H}$  NMR (400 MHz,  $\text{CDCl}_3$ ):  $\delta(\text{ppm}) = 13.72$  (s, 1H), 7.95 (s, 1H), 7.40 – 7.15 (m, 12H), 7.02 (d,  $J = 2.4$  Hz, 1H), 5.00 (d,  $J = 6.9$  Hz, 1H), 4.46 (d,  $J = 6.9$  Hz, 1H), 2.30 – 1.95 (m, 1H), 1.41 (s, 9H).

$^{13}\text{C}$  NMR (101 MHz,  $\text{CDCl}_3$ ):  $\delta(\text{ppm}) = 165.4, 159.5, 140.1, 139.2, 132.6, 131.9, 128.9, 128.2, 127.3, 119.9, 109.9, 80.2, 78.4, 35.2$  .

## General Procedure for the Preparation of allyl alcohols<sup>[4]</sup>

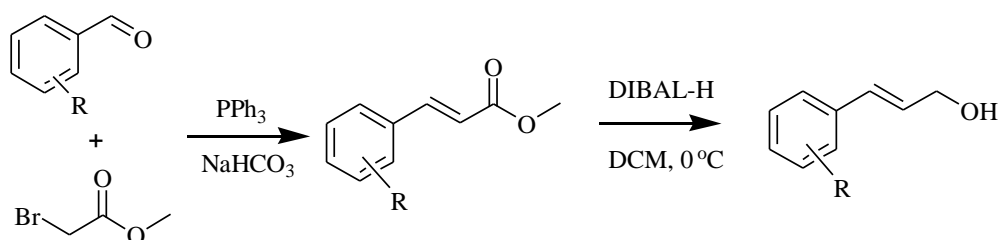

To a solution of triphenylphosphine (1.97g 7.5 mmol) in saturated NaHCO<sub>3</sub> (10 mL) at room temperature were added methyl bromoacetate (737μL) and aldehyde (5.0 mmol) stirred 3h. The phases were separated and extracted with EtOAc (2 x 10 mL). The combined organic extracts were washed with brine (5 mL), dried over anhydrous Na<sub>2</sub>SO<sub>4</sub>, and concentrated in vacuo. The crude product was dissolved in DCM (10 mL) in a 100 mL round-bottom flask and cooled to 0 °C Neat diisobutylaluminum hydride (10 mmol) was added dropwise and the reaction mixture was stirred for 3 h. an aqueous saturated solution of Rochelle's salt (20 mL) was slowly added followed by water (15 mL) and diethyl ether (20 mL). The emulsion was stirred vigorously overnight. The phases were separated and the aqueous phase was extracted with diethyl ether (2 x 20 mL). The combined organic extracts were washed with brine (10 mL), dried over anhydrous Na<sub>2</sub>SO<sub>4</sub>, filtered, and concentrated in vacuo. The crude product was then purified by flash chromatography to provide the desired allylic alcohol.

## General Procedure for the Preparation of Bromochloroalcohols/Synthesis and Characterization of the Products<sup>[5]</sup>

### General Procedure for the Preparation of Racemic Bromochlorides:

To an allylic alcohol substrate (0.1 mmol) in *n*-hexane (1 mL) is added ClTi(Oi-Pr)<sub>3</sub> (0.11 mmol, 1.10 equiv). To this solution is added solid *N*-bromosuccinimide (18.7 mg, 0.105 mmol, 1.05 equiv). The solution is stirred at room temperature and monitored by TLC. When judged complete, the reaction is quenched with saturation Na<sub>2</sub>SO<sub>3</sub> solution (0.5 mL), and stirred vigorously for 15 min., then added 1M HCl (1 mL), the organic layer is separated and the aqueous layer is extracted with EtOAc (2 x 0.5 mL). The combine organic layers were dried over Na<sub>2</sub>SO<sub>4</sub>, filtered, and concentrated in vacuo to provide crude material, which is purified by flash column chromatography to provide the desired racemic bromochloride.

### Synthesis and Characterization of Dihalide Products:

**(Method A):** To a solution of allylic alcohol substrate (0.5 mmol) in hexanes (3.0 mL) in reaction tube is added ClTi(Oi-Pr)<sub>3</sub> (0.55 mmol, 1.1 equiv) under nitrogen in at room temperature. To this solution is added a solution of **L-B1** (0.05mmol, 0.1 equiv) in hexanes (2 mL) dropwise over 1 min. then the solution is cooled to -20 °C. To this solution is added all at once solid *N*-bromosuccinimide (0.55 mmol,1.1 equiv). The reaction is stirred vigorously (700 rpm) over night. Reactions are monitored by TLC. The reaction mixture is quenched with saturation Na<sub>2</sub>SO<sub>3</sub> solution (5 mL), diluted with 1M HCl (10 mL), and allowed to warm to room temperature with vigorous stirring for 10 min. The layers are separated and the aqueous layer is extracted with EtOAc (2 x 10 mL). The combined organic layers are washed with saturated aqueous NaCl (20 mL), dried over Na<sub>2</sub>SO<sub>4</sub>, filtered, and concentrated in vacuo to provide crude material, which is purified by flash column chromatography (EtOAc : hexane 17:1 to 10:1 )to provide the desired bromochloride.

**(Method B):** To a solution of allylic alcohol substrate (0.5 mmol) and *t*-BuOH(0.5

mmol) in hexanes (3.0 mL) in reaction tube is cooled to -20 °C for 5 min then ClTi(Oi-Pr)<sub>3</sub> (0.55 mmol, 1.1 equiv) was added under nitrogen at -20 °C for 5 min. To this solution is added a solution of **L30** (0.05mmol, 0.1 equiv) in hexanes (2 mL) dropwise over 1 min at -20 °C for 30 min. To this solution is added all at once solid N-bromosuccinimide (0.55 mmol, 1.1 equiv). The reaction is stirred vigorously (700 rpm) over night. Reactions are monitored by TLC. The reaction mixture is quenched with saturation Na<sub>2</sub>SO<sub>3</sub> solution (5 mL), diluted with 1M HCl (10 mL), and allowed to warm to room temperature with vigorous stirring for 15 min. The layers are separated and the aqueous layer is extracted with EtOAc (2 x 10 mL). The combined organic layers are washed with saturated aqueous NaCl (20 mL), dried over Na<sub>2</sub>SO<sub>4</sub>, filtered, and concentrated in vacuo to provide crude material, which is purified by flash column chromatography (EtOAc : hexane = 17:1 to 10:1 )to provide the desired bromochloride.

If there is no special noted, the bromochlorides **2** was obtained from **method A**.

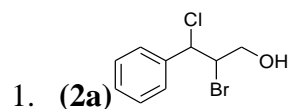

White waxy solid, m.p.= 69-70 °C; **method A**, yield: 80%; cr: 33: 1; 86% *ee*; **method B**, yield: 75%; cr: 25:1; 92% *ee*; [HPLC condition: Chiralcel AS-H column, *n*-hexane/*i*-PrOH = 95:5, flow rate = 1.0 mL/min, *t<sub>R</sub>* = 11.52 min, *t<sub>R</sub>* = 13.68 min]; [α]<sub>D</sub><sup>20</sup> = -17.3(c = 3.7, CHCl<sub>3</sub>);

<sup>1</sup>H NMR (400 MHz, CDCl<sub>3</sub>) δ: 7.46-7.34 (m, 5H), 5.21 (d, *J* = 10.1 Hz, 1H), 4.55 (ddd, *J* = 10.0, 4.7, 3.0 Hz, 1H), 4.27 (dd, *J* = 12, 4.0 Hz, 1H), 4.15 (dd, *J* = 12.0, 4.0 Hz, 1H), 2.42 (s, 1H) ppm;

<sup>13</sup>C NMR (101 MHz, CDCl<sub>3</sub>) δ: 139.0, 129.1, 128.7, 127.8, 64.7, 61.6, 59.7 ppm;

IR (KBr)<sub>v<sub>max</sub></sub>: 3418.8, 3067.2, 2930.9, 1955.4, 1618.0, 1495.8, 1455.6, 1388.5, 1280.0, 1232.6, 1167.5, 1071.3, 954.1, 824.9, 771.12, 700.5, 608.1 cm<sup>-1</sup>.

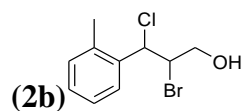

White waxy solid , m.p.= 89-90 °C; **method A**, yield: 71% ; cr: 13:1; 70% *ee*;

**method B**, yield: 70% ; cr: 13: 1; 48% *ee*; [HPLC condition: Chiralcel OJ-H column, *n*-hexane/*i*-PrOH = 95:5, flow rate = 1.0 mL/min,  $t_R = 26.23$  min,  $t_R = 37.90$  min];  $[\alpha]_D^{20} = -5.90$  ( $c = 4.5$ ,  $\text{CHCl}_3$ );

$^1\text{H}$  NMR (400 MHz,  $\text{CDCl}_3$ )  $\delta$ : 7.44-7.37 (m, 1H), 7.25 – 7.18 (m, 2H), 7.16 (s, 1H), 5.48 (d,  $J = 10.7$  Hz, 1H), 4.58 (ddd,  $J = 10.7, 4.5, 2.6$  Hz, 1H), 4.28 (dd,  $J = 12.0, 4.0$  Hz, 1H), 4.19 (dd,  $J = 12.0, 4.0$  Hz, 1H), 2.40 (d,  $J = 9.6$  Hz, 3H), 2.31 (s, 1H) ppm ;

$^{13}\text{C}$  NMR (101 MHz,  $\text{CDCl}_3$ )  $\delta$ : 137.6, 136.0, 130.7, 128.8, 126.8, 126.8, 64.8, 59.3, 57.2, 19.4 ppm ;

IR (KBr) $\nu_{\text{max}}$ : 3409.1, 3067.4, 2930.8, 2876.9, 1924.7, 1810.5, 1617.6, 1492.0, 1453.3, 1372.5, 1291.5, 1256.4, 1224.2, 1159.1, 1114.6, 1088.0, 1063.9, 969.9, 904.0, 866.5, 844.6, 764.5, 730.0, 704.2, 650.2  $\text{cm}^{-1}$ .

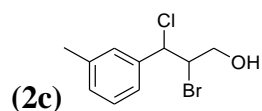

White waxy solid , m.p.= 49-50 °C; **method A**, yield: 74% ; cr: 19:1; 85% *ee*; **method B**, yield: 72% ; cr: 17:1; 79% *ee*; [HPLC condition: Chiralcel OJ-H column, *n*-hexane/*i*-PrOH = 95:5, flow rate = 1.0 mL/min,  $t_R = 25.15$  min,  $t_R = 31.82$  min];  $[\alpha]_D^{20} = -13.3$ ( $c = 3.7$ ,  $\text{CHCl}_3$ );

$^1\text{H}$  NMR (400 MHz,  $\text{CDCl}_3$ )  $\delta$ : 7.25 – 7.21 (m, 1H), 7.15 (dd,  $J = 11.4, 8.1$  Hz, 3H), 5.13 (d,  $J = 10.0$  Hz, 1H), 4.51 (ddd,  $J = 10.0, 4.7, 3.0$  Hz, 1H), 4.26 (dd,  $J = 12.0, 4.0$  Hz, 1H), 4.16 (dd,  $J = 12.0, 4.0$  Hz, 1H), 2.37 (s, 1H), 2.35 (s, 3H) ppm ;

$^{13}\text{C}$  NMR (101 MHz,  $\text{CDCl}_3$ )  $\delta$ : 138.9, 138.4, 129.8, 128.5, 128.5, 124.8, 64.7, 61.8, 59.7, 21.5 ppm ;

IR (KBr) $\nu_{\text{max}}$ : 3409.1, 3087.4, 2930.8, 2876.9, 1924.7, 1830.5, 1617.6, 1493.0, 1463.3, 1374.5, 1159.4, 1064.6, 790.9, 730.4, 699.2, 607.3  $\text{cm}^{-1}$ .

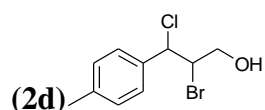

White waxy solid , m.p.= 96-97 °C; **method A**, yield: 81%; cr: 24:1; 86% *ee*; **method B**, yield: 78%; cr: 24:1; 93% *ee*; [HPLC condition: Chiralcel IA-H column,

*n*-hexane/*i*-PrOH = 95:5, flow rate = 1.0 mL/min,  $t_R = 14.83$  min,  $t_R = 17.66$  min];  
[ $\alpha$ ]<sub>D</sub><sup>20</sup> = -15.3 (c = 3.3, CHCl<sub>3</sub>);

<sup>1</sup>H NMR (400 MHz, CDCl<sub>3</sub>)  $\delta$ : 7.31 (d,  $J = 8.1$  Hz, 2H), 7.21 (d,  $J = 8.0$  Hz, 2H), 5.19 (d,  $J = 10.0$  Hz, 1H), 4.55 (ddd,  $J = 10.0, 4.7, 3.0$  Hz, 1H), 4.26 (dd,  $J = 12.0, 4.0$  Hz, 1H), 4.16 (dd,  $J = 12.0, 4.0$  Hz, 1H), 2.45 (s, 1H), 2.38 (s, 3H) ppm;

<sup>13</sup>C NMR (101 MHz, CDCl<sub>3</sub>)  $\delta$ : 139.0, 136.2, 129.4, 127.7, 64.7, 61.7, 59.8, 21.3 ppm;

IR (KBr) $\nu_{\max}$ : 3550.2, 3414.3, 2925.5, 1637.5, 1617.2, 1555.4, 1159.4, 1064.6, 780.9, 730.4, 689.2, 609.1 cm<sup>-1</sup>.

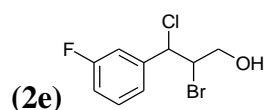

Colorless viscous liquid; **method B**, yield: 74%; cr: 8.2:1; 78% *ee*; **method B**, yield: 74%; cr: 13:1; 80% *ee*; [HPLC condition: Chiralcel OJ-H column, *n*-hexane/*i*-PrOH = 95:5, flow rate = 1.0 mL/min,  $t_R = 14.83$  min,  $t_R = 17.66$  min]; [ $\alpha$ ]<sub>D</sub><sup>20</sup> = -7.85 (c = 3.2, CHCl<sub>3</sub>);

<sup>1</sup>H NMR (400 MHz, CDCl<sub>3</sub>)  $\delta$ : 7.36 (td,  $J = 8.0, 5.8$  Hz, 1H), 7.23 – 7.13 (m, 2H), 7.07 (td,  $J = 8.4, 2.4$  Hz, 1H), 5.20 (d,  $J = 10.0$  Hz, 1H), 4.49 (ddd,  $J = 10.0, 4.5, 3.1$  Hz, 1H), 4.28 (dd,  $J = 12.0, 4.0$  Hz, 1H), 4.14 (dd,  $J = 12.0, 4.0$  Hz, 1H), 2.48 (s, 1H) ppm;

<sup>13</sup>C NMR (101 MHz, CDCl<sub>3</sub>)  $\delta$ : 163.9, 161.5, 141.4, 130.2, 123.7, 116.2, 116.0, 115.0, 114.8, 64.5, 60.6, 59.1 ppm;

IR (KBr) $\nu_{\max}$ : 3415.6, 2931.1, 2879.1, 1616.2, 1593.2, 1489.8, 1451.4, 1376.9, 1230.5, 1158.9, 1105.3, 1058.5, 1014.1, 953.8, 904.3, 839.5, 787.5, 737.4, 696.2, 642.0, 613 cm<sup>-1</sup>.

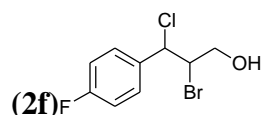

White waxy solid, m.p.= 64-65 °C ; **method A**, yield: 77% ; cr: 24:1; 80% *ee*; **method B**, yield: 78% ; cr: 18:1; 88% *ee*; [HPLC condition: Chiralcel OJ-H column, *n*-hexane/*i*-PrOH = 95:5, flow rate = 1.0 mL/min,  $t_R = 32.84$  min,  $t_R = 34.81$  min];  $[\alpha]_D^{20} = -9.89$  (c = 4.1, CHCl<sub>3</sub>);

<sup>1</sup>H NMR (400 MHz, CDCl<sub>3</sub>) δ: 7.41-7.32 (m, 2H), 7.06 (t, *J* = 8.6 Hz, 2H), 5.18 (d, *J* = 10.0 Hz, 1H), 4.47 (ddd, *J* = 10.0, 4.5, 3.1 Hz, 1H), 4.24 (dd, *J* = 12, 4.0 Hz, 1H), 4.11 (dd, *J* = 12, 4.0 Hz, 1H), 2.44 (s, 1H) ppm;

<sup>13</sup>C NMR (101 MHz, CDCl<sub>3</sub>) δ: 164.1, 161.6, 135.0, 129.7, 115.8, 115.6, 64.6, 60.8, 59.7 ppm;

IR (KBr)<sub>v<sub>max</sub></sub>: 3416.6, 2931.4, 1903.5, 1604.4, 1510.7, 1453.1, 1422.2, 1369.5, 1299.0, 1231.5, 1159.9, 1105.4, 1058.7, 1014.5, 955.8, 904.4, 839.0, 787.8, 737.8, 696.4, 643.0, 623.1 cm<sup>-1</sup>.

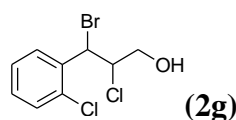

White waxy solid, m.p.= 86-87 °C; **method A**, yield: 72%; cr: 13:1; 80% *ee*; **method B**, yield: 78% ; cr: 10:1; 74% *ee*; [HPLC condition: Chiralcel OJ-H column, *n*-hexane/*i*-PrOH = 95:5, flow rate = 1.0 mL/min,  $t_R = 25.71$  min,  $t_R = 31.21$  min];  $[\alpha]_D^{20} = -6.89$  (c = 2.3, CHCl<sub>3</sub>);

<sup>1</sup>H NMR (400 MHz, CDCl<sub>3</sub>) δ: 7.53 (dd, *J* = 7.7, 1.6 Hz, 1H), 7.40 (d, *J* = 7.8 Hz, 1H), 7.36-7.27 (m, 2H), 5.77 (d, *J* = 10.1 Hz, 1H), 4.62 (ddd, *J* = 10.0, 4.7, 2.8 Hz, 1H), 4.25 (dd, *J* = 12.0, 4.0 Hz, 1H), 4.18 (dd, *J* = 12.0, 4.0 Hz, 1H), 2.33 (s, 1H) ppm ;

<sup>13</sup>C NMR (101 MHz, CDCl<sub>3</sub>) δ: 136.8, 133.6, 130.0, 128.9, 127.5, 64.5, 58.5, 57.1 ppm ;

IR (KBr)<sub>v<sub>max</sub></sub>: 3699.8, 3553.6, 3477.7, 3413.7, 3234.4, 2932.1, 1616.8, 1446.2, 1094.1, 741.1, 621.1 cm<sup>-1</sup>.

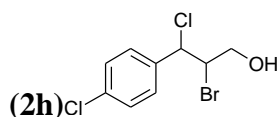

White waxy solid, m.p.= 86-87 °C; **method A**, yield: 72%; cr: 10:1; 80% *ee*; **method**



**B**, yield: 83% ; cr: 14:1; 80% *ee*, [HPLC condition: Chiralcel IA-H column, *n*-hexane/*i*-PrOH = 95:5, low rate = 1.0 mL/min,  $t_R = 14.15$  min,  $t_R = 17.89$  min];  $[\alpha]_D^{20} = -5.69$  ( $c = 3.6$ ,  $\text{CHCl}_3$ );

$^1\text{H}$  NMR (400 MHz,  $\text{CDCl}_3$ )  $\delta$ : 7.38-7.31 (m, 4H), 5.17 (d,  $J = 10.0$  Hz, 1H), 4.50-4.44 (m, 1H), 4.35 (dd,  $J = 88.0, 4.0$  Hz, 1H), 4.11 (dd,  $J = 16.0, 4.0$  Hz, 1H), 2.60 (s, 1H) ppm ;

$^{13}\text{C}$  NMR (101 MHz,  $\text{CDCl}_3$ )  $\delta$ : 137.6, 134.9, 129.2, 128.9, 64.5, 60.6, 59.2 ppm ;

IR (KBr) $\nu_{\text{max}}$ : 3416.0, 2933.2, 1637.6, 1493.1, 1413.1, 1157.7, 1092.0, 1013.8, 829.7, 733.2, 614.3  $\text{cm}^{-1}$ .

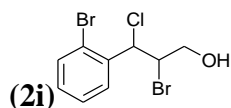

yield: 75%; White waxy solid, m.p.= 78-79 °C; cr: 9:1; 82% *ee* [HPLC condition: Chiralcel OJ-H column, *n*-hexane/*i*-PrOH = 95:5, flow rate = 1.0 mL/min,  $t_R = 29.11$  min,  $t_R = 39.41$  min];  $[\alpha]_D^{20} = -7.36$  ( $c = 3.1$ ,  $\text{CHCl}_3$ );

$^1\text{H}$  NMR (400 MHz,  $\text{CDCl}_3$ )  $\delta$ : 7.58 (dd,  $J = 8.1, 1.1$  Hz, 1H), 7.52 (dd,  $J = 7.9, 1.5$  Hz, 1H), 7.41-7.32 (m, 1H), 7.22 – 7.15 (m, 1H), 5.77 (d,  $J = 10.0$  Hz, 1H), 4.60 (ddd,  $J = 9.9, 4.7, 2.8$  Hz, 1H), 4.21 (qd,  $J = 12.7, 3.9$  Hz, 2H), 2.42 (s, 1H) ppm;

$^{13}\text{C}$  NMR (101 MHz,  $\text{CDCl}_3$ )  $\delta$ : 138.4, 133.2, 130.3, 128.9, 128.2, 124.1, 64.4, 59.6, 58.6 ppm;

IR (KBr) $\nu_{\text{max}}$ : 3551.7, 3414.1, 1637.5, 1617.6, 1091.8, 737.6, 621.0  $\text{cm}^{-1}$ .

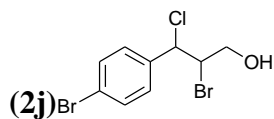

White waxy solid, m.p.= 69-70 °C; **method A**, yield: 70% ; cr: 10:1; 75% *ee*; **method B**, yield: 75% ; cr: 11:1; 72% *ee*; [HPLC condition: Chiralcel IA-H column, *n*-hexane/*i*-PrOH = 95:5, flow rate = 1.0 mL/min,  $t_R = 15.06$  min,  $t_R = 20.17$  min];  $[\alpha]_D^{20} = -6.26$  ( $c = 5.4$ ,  $\text{CHCl}_3$ );

$^1\text{H}$  NMR (400 MHz,  $\text{CDCl}_3$ )  $\delta$ : 7.47-7.39 (m, 2H), 7.17 (d,  $J = 8.5$  Hz, 2H), 5.07 (d,  $J = 10.0$  Hz, 1H), 4.37 (ddd,  $J = 10.0, 4.4, 3.1$  Hz, 1H), 4.03 (dd,  $J = 16.0, 4.0$  Hz, 1H), 3.88 (dd,  $J = 12.0, 4.0$  Hz, 1H), 2.57 (s, 1H) ppm;

$^{13}\text{C}$  NMR (101 MHz,  $\text{CDCl}_3$ )  $\delta$ : 138.0, 131.8, 129.5, 123.0, 64.4, 60.6, 59.1 ppm;

IR (KBr) $\nu_{\text{max}}$ : 3414.3, 2927.6, 1618.1, 1590.6, 1489.2, 1409.7, 1158.6, 1073.5, 1009.7, 958.8, 826.4, 732.5, 676.8, 611.5  $\text{cm}^{-1}$ .

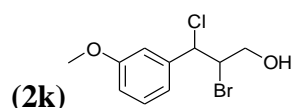

yield: 22%; White waxy solid, m.p.= 53-54  $^{\circ}\text{C}$ ; cr: 12:1; 81% *ee* [HPLC condition: Chiralcel OJ-H column, *n*-hexane/*i*-PrOH = 85:15, flow rate = 1.0 mL/min,  $t_{\text{R}} = 24.05$  min,  $t_{\text{R}} = 29.39$  min];  $[\alpha]_{\text{D}}^{20} = -7.26$  ( $c = 2.4$ ,  $\text{CHCl}_3$ );

$^1\text{H}$  NMR (400 MHz,  $\text{CDCl}_3$ )  $\delta$ : 7.30 (t,  $J = 7.9$  Hz, 1H), 7.01-6.87 (m, 3H), 5.14 (d,  $J = 10.0$  Hz, 1H), 4.51 (ddd,  $J = 10.0, 4.7, 3.0$  Hz, 1H), 4.24 (dd,  $J = 12.0, 4.0$  Hz, 1H), 4.13 (dd,  $J = 12.0, 4.0$  Hz, 1H), 3.83 (s, 3H), 2.14 (s, 1H) ppm;

$^{13}\text{C}$  NMR (101 MHz,  $\text{CDCl}_3$ )  $\delta$ : 159.8, 140.5, 129.8, 120.2, 114.5, 113.8, 64.7, 61.5, 59.7, 55.5 ppm;

IR (KBr) $\nu_{\text{max}}$ : 3414.7, 3001.7, 2925.0, 2868.7, 1600.1, 1494.3, 1465.1, 1436.4, 1353.4, 1324.1, 1264.4, 1168.2, 1084.6, 1036.8, 995.7, 975.2, 855.8, 788.8, 751.0, 719.9, 691.0, 662.1, 629.5  $\text{cm}^{-1}$ .

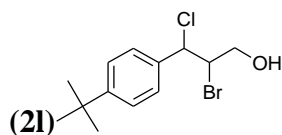

White waxy solid, m.p.= 57-58  $^{\circ}\text{C}$ ; **method A**, yield: 69%; cr: 32:1; 86% *ee*; **method B**, yield: 74%; cr: 50:1; 90% *ee*, [HPLC condition: Chiralcel OJ-H column, *n*-hexane/*i*-PrOH = 98:2, flow rate = 0.7 mL/min,  $t_{\text{R}} = 17.50$  min,  $t_{\text{R}} = 20.02$  min];  $[\alpha]_{\text{D}}^{20} = -9.26$  ( $c = 4.3$ ,  $\text{CHCl}_3$ );

$^1\text{H}$  NMR (400 MHz,  $\text{CDCl}_3$ )  $\delta$ : 7.33-7.27 (m, 2H), 7.25-7.20 (m, 2H), 5.10 (d,  $J = 9.8$  Hz, 1H), 4.45 (ddd,  $J = 9.8, 4.8, 3.1$  Hz, 1H), 4.24 (dd,  $J = 12.0, 4.0$  Hz, 1H), 4.13 (dd,  $J = 12.0, 4.0$  Hz, 1H), 2.32 (s, 1H), 1.23 (s, 9H) ppm;

$^{13}\text{C}$  NMR (101 MHz,  $\text{CDCl}_3$ )  $\delta$ : 152.1, 135.9, 127.4, 125.6, 64.7, 61.7, 59.8, 34.7, 31.4 ppm;

IR (KBr) $\nu_{\text{max}}$ : 409.1, 3087.4, 2930.8, 2876.9, 1924.5, 1820.5, 1616.6, 1493.5, 1463.2, 1373.5, 1159.4, 1064.6, 791.9, 720.4, 698.2, 606.3  $\text{cm}^{-1}$ .

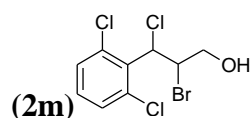

yield: 60 % ; White waxy solid , m.p.= 45-46  $^{\circ}\text{C}$ ; cr: 3.2:1; 80% *ee* [HPLC condition: Chiralcel OD-H column, *n*-hexane/*i*-PrOH = 98:2, flow rate = 1.0 mL/min,  $t_{\text{R}} = 23.41$  min,  $t_{\text{R}} = 32.02$  min];  $[\alpha]_{\text{D}}^{20} = -8.33$  ( $c = 2.1$ ,  $\text{CHCl}_3$ );

$^1\text{H}$  NMR (400 MHz,  $\text{CDCl}_3$ )  $\delta$ : 7.35 (ddd,  $J = 10.0, 5.4, 2.1$  Hz, 2H), 7.20 (td,  $J = 8.1, 5.1$  Hz, 1H), 6.25 (d,  $J = 11.6$  Hz, 1H), 6.17 (d,  $J = 11.3$  Hz, 1H), 5.49 (ddd,  $J = 11.6, 3.7, 2.4$  Hz, 1H), 5.37 (ddd,  $J = 11.3, 3.8, 2.4$  Hz, 1H), 4.27 (dd,  $J = 12.0, 4.0$  Hz, 1H), 4.18 (dd,  $J = 16.0, 4.0$  Hz, 1H), 2.19 (s, 1H) ppm ;

$^{13}\text{C}$  NMR (101 MHz,  $\text{CDCl}_3$ )  $\delta$ : 130.6, 130.3, 128.7, 64.3, 55.8, 55.2 ppm;

IR (KBr) $\nu_{\text{max}}$ : 3412.7, 2926.8, 2874.4, 1617.6, 1580.1, 1562.0, 1437.2, 1347.8, 1210.5, 1186.2, 1149.8, 1092.2, 1071.8, 958.2, 907.4, 845.7, 781.2, 754.3, 713.5, 678.3, 615.5  $\text{cm}^{-1}$ .

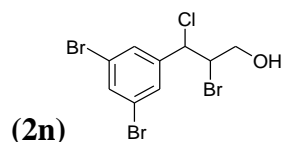

yield: 74 % ; White waxy solid , m.p. = 101-102  $^{\circ}\text{C}$ ; cr: 6.3:1; **method A**, 82% *ee*; **method B**, 14% *ee*, [HPLC condition: Chiralcel OD-H column, *n*-hexane/*i*-PrOH = 98:2, flow rate = 1.0 mL/min,  $t_{\text{R}} = 24.37$  min,  $t_{\text{R}} = 26.89$  min];  $[\alpha]_{\text{D}}^{20} = -7.33$  ( $c = 4.2$ ,  $\text{CHCl}_3$ );

$^1\text{H}$  NMR (400 MHz,  $\text{CDCl}_3$ )  $\delta$ : 7.65 (s, 1H), 7.48 (d,  $J = 1.6$  Hz, 2H), 5.08 (d,  $J = 10.1$  Hz, 1H), 4.48-4.36 (m, 1H), 4.24 (dd,  $J = 12.0, 4.0$  Hz, 1H), 4.08 (dd,  $J = 12.0, 4.0$  Hz, 1H), 2.23 (s, 1H) ppm;

$^{13}\text{C}$  NMR (101 MHz,  $\text{CDCl}_3$ )  $\delta$ : 142.8, 134.8, 129.9, 123.1, 64.4, 59.6, 58.6 ppm;

IR (KBr) $\nu_{\text{max}}$ : 3414.2, 2925.4, 2854.2, 1730.1, 1638.0, 1617.7, 1585.3, 1560.7, 1430.8, 1351.0, 1197.6, 1157.4, 1099.2, 1065.7, 972.2, 919.5, 874.9, 855.9, 746.7, 687.1, 605.3  $\text{cm}^{-1}$ .

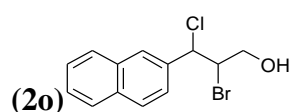

White waxy solid, m.p.= 88-89  $^{\circ}\text{C}$  ; **method A** yield: 74%; cr: 11:1; 76% *ee*; **method B**, yield: 76%; cr: 10:1; 78% *ee*; [HPLC condition: Chiralcel AD-H column, *n*-hexane/*i*-PrOH = 98:2, flow rate = 0.8 mL/min,  $t_{\text{R}} = 53.8$  min,  $t_{\text{R}} = 61.1$  min];  $[\alpha]_{\text{D}}^{20} = -18.33$  ( $c = 4.2$ ,  $\text{CHCl}_3$ );

$^1\text{H}$  NMR (400 MHz,  $\text{CDCl}_3$ )  $\delta$ : 7.94-7.86 (m, 4H), 7.60-7.52 (m, 3H), 5.43 (d,  $J = 10.1$  Hz, 1H), 4.69 (ddd,  $J = 10.1, 4.6, 3.0$  Hz, 1H), 4.35 (dd,  $J = 12.0, 4.0$  Hz, 1H), 4.25 (dd,  $J = 12.0, 4.0$  Hz, 1H), 2.43 (s, 1H) ppm ;

$^{13}\text{C}$  NMR (101 MHz,  $\text{CDCl}_3$ )  $\delta$ : 136.2, 133.5, 132.9, 128.9, 128.3, 127.8, 126.8, 124.5, 64.7, 62.0, 59.5 ppm ;

IR (KBr) $\nu_{\text{max}}$ : 3415.6, 2931.1, 2879.1, 1616.2, 1593.1, 1489.8, 1451.4, 1376.9, 1261.7, 1144.4, 1064.0, 973.5, 947.0, 867.8, 786.7, 691.0, 658.5, 620.4  $\text{cm}^{-1}$ .

## References

- [1] a) Gao, G.; Gu, F. L.; Jiang, J. X.; Jiang, K.; Sheng, C. Q.; Lai, G. Q.; Xu, L. W. *Chem. Eur. J.* **2011**, *17*, 2698-2703; b) Zheng, L. S.; Jiang, K. Z.; Deng, Y.; Bai, X. F.; Gao, G.; Gu, F. L.; Xu, L. W. *Eur. J. Org. Chem.* **2013**, 748-755;
- [2] Huang, W. S.; Xu, Z.; Yang, K. F.; Chen, L.; Zheng, Z. J.; Xu, L. W. *RSC Adv.* **2015**, *5*, 46455-46463;
- [3] Wang, C. Y.; Dong, C.; Zheng, Z. J.; Xu, Z.; Yang, K. F.; Xu, L. W. *RSC Adv.* **2015**, *5*, 55819-55824.
- [4] a) Miura, T.; Okazaki, K.; Ogawa, K.; Otomo, E.; Umetsu, S.; Takahashi, M.; Kawashima, Y.; Jyo, Y.; Koyata, N.; Murakami, Y.; Imai, N. *Synthesis*, **2008**, *17*, 2695-2700; b) Zheng, H.; Lejkowski, M.; Hall, D. G. *Chem. Sci.* **2011**, *2*, 1305-1310.
- [5] Hu, D. X.; Seidl, F. J.; Bucher, C.; Burns, N. Z. *J. Am. Chem. Soc.* **2015**, *137*, 3795-3798.

**Table S1. Frontier orbital energy (in eV) calculated at B3LYP/6-31G(d,p) level of theory**

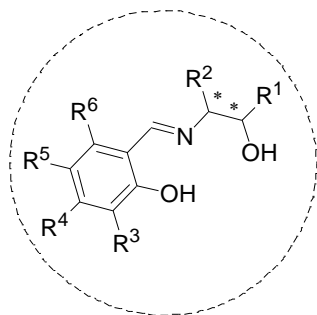

**L20:**  $R^1 = R^4 = R^6 = H, R^2 = Ph, R^3 = R^5 = t\text{-Bu}$

**L21:**  $R^1 = R^2 = Ph, R^4 = R^6 = H, R^3 = \text{Si}(i\text{-Pr})_3, R^5 = \text{Me}$

**L22:**  $R^1 = R^2 = Ph, R^4 = R^6 = H, R^3 = \text{TBS}, R^5 = \text{Me}$

**L23:**  $R^1 = R^2 = Ph, R^4 = R^6 = R^5 = H, R^3 = \text{CH}_2\text{TMS}$

**L24:**  $R^1 = R^2 = Ph, R^3 = R^4 = R^6 = H, R^5 = F$

**L25:**  $R^1 = R^2 = Ph, R^4 = R^6 = R^5 = H, R^3 = \text{Me}$

**L26:**  $R^1 = R^2 = Ph, R^4 = R^6 = H, R^5 = F, R^3 = \text{Me}$

**L27:**  $R^1 = R^2 = Ph, R^4 = R^6 = H, R^5 = F, R^3 = \text{Br}$

**L28:**  $R^1 = R^2 = Ph, R^3 = R^4 = R^5 = R^6 = H$

**L29:**  $R^1 = R^2 = Ph, R^3 = R^4 = R^6 = H, R^5 = \text{Cl}$

**L30:**  $R^1 = R^2 = Ph, R^4 = R^6 = H, R^5 = \text{Br}, R^3 = t\text{-Bu}$

**L-B1:**  $R^1 = R^2 = Ph, R^4 = R^6 = H, R^5 = R^3 = t\text{-Bu}$

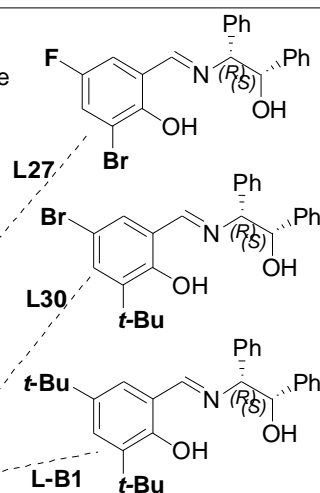

| Ligand      | LUMO   | HOMO   | $\Delta$ | $ee\%$ of product <b>2a</b> | $R^1$ | $R^3/R^5$                          |
|-------------|--------|--------|----------|-----------------------------|-------|------------------------------------|
| <b>L20</b>  | -1.030 | -5.807 | 4.777    | ND                          | H     | <i>t</i> -Bu/ <i>t</i> -Bu         |
| <b>L21</b>  | -0.939 | -5.725 | 4.786    | 18                          | Ph    | Si( <i>i</i> -Pr) <sub>3</sub> /Me |
| <b>L22</b>  | -0.947 | -5.731 | 4.784    | 66                          | Ph    | TBS/Me                             |
| <b>L23</b>  | -0.903 | -5.788 | 4.885    | 55                          | Ph    | CH <sub>2</sub> TMS/H              |
| <b>L24</b>  | -1.215 | -5.951 | 4.736    | 78                          | Ph    | H/F                                |
| <b>L25</b>  | -1.220 | -6.142 | 4.922    | 77                          | Ph    | Me/H                               |
| <b>L26</b>  | -1.147 | -5.877 | 4.73     | 77                          | Ph    | Me/F                               |
| <b>L27</b>  | -1.450 | -6.160 | 4.71     | 85                          | Ph    | Br/F                               |
| <b>L-B1</b> | -0.862 | -5.684 | 4.822    | 80                          | Ph    | <i>t</i> -Bu/ <i>t</i> -Bu         |
| <b>L28</b>  | -1.025 | -6.000 | 4.975    | 57                          | Ph    | H/H                                |
| <b>L29</b>  | -1.308 | -6.074 | 4.766    | 67                          | Ph    | H/Cl                               |

**Figure S1.** HOMO-LUMO structure of ligands **L20-L30**.

| L  | LUMO                                                                                          | HOMO                                                                                          | L  | LUMO                                                                                           | HOMO                                                                                            |
|----|-----------------------------------------------------------------------------------------------|-----------------------------------------------------------------------------------------------|----|------------------------------------------------------------------------------------------------|-------------------------------------------------------------------------------------------------|
| 20 | 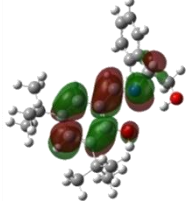<br>-1.030   | <br>-5.807   | 26 | <br>-1.147   | <br>-5.877   |
| 21 | <br>-0.939   | <br>-5.725   | 27 | <br>-1.450   | <br>-6.160   |
| 22 | <br>-0.947  | <br>-5.731  | B1 | <br>-0.862   | <br>-5.684   |
| 23 | <br>-0.903 | <br>-5.788 | 28 | <br>-1.025 | <br>-6.000 |
| 24 | <br>-1.215 | <br>-5.951 | 29 | <br>-1.308 | <br>-6.074 |
| 25 | <br>-1.220 | <br>-6.142 |    |                                                                                                |                                                                                                 |

**Figure S2. Nonlinear effects in Schiff base L-B1 -promoted bromochlorination of allylic alcohol 1a.**

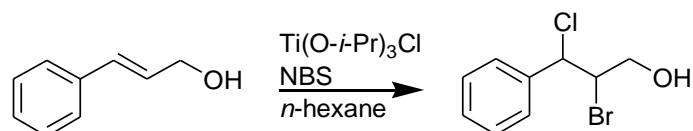

| Entry           | 1         | 2         | 3         | 4         | 5        |
|-----------------|-----------|-----------|-----------|-----------|----------|
| L(R.S): L (S.R) | 5 % : 5 % | 4 % : 6 % | 3 % : 7 % | 2 % : 8 % | 0 : 10 % |
| Ee of L/%       | 0         | 20        | 40        | 60        | 100      |
| Ee/%            | 0         | 35        | 55        | 70        | 86       |

**Reaction conditions:** 0.5 mmol ;*n*-hexane 5.0 mL ;Ti:0.55mmol ;L: 0.1 eq(0.05mmol) ;NBS:0.55 mmol; at -20°C.

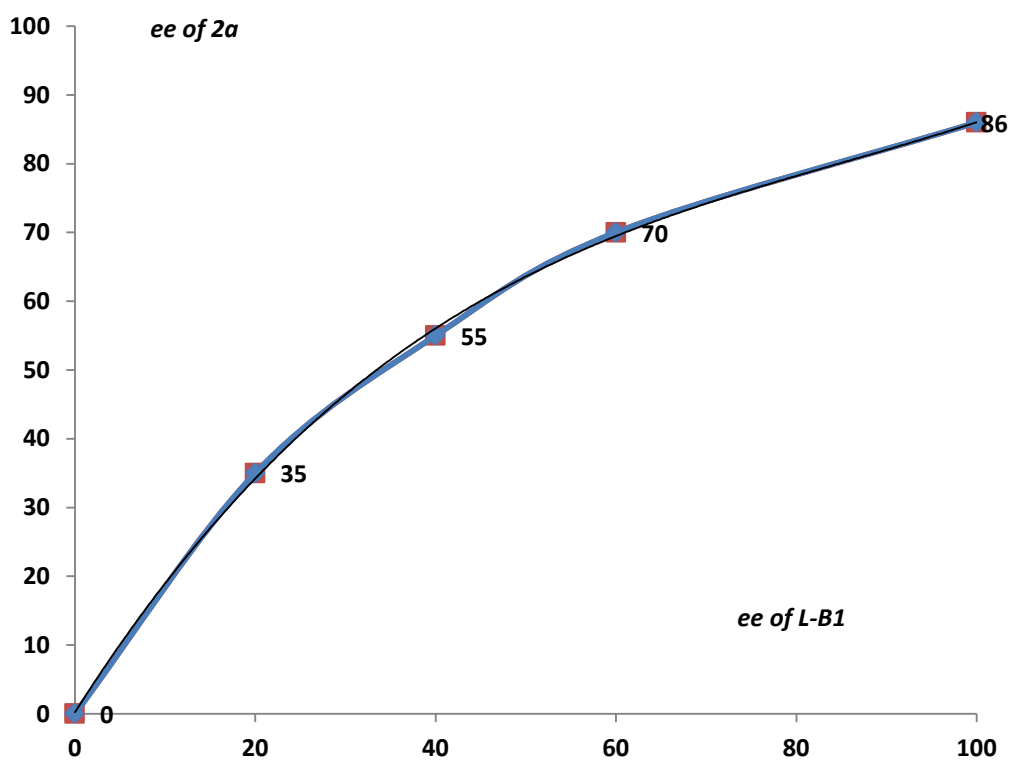



**Figure S3.  $^1\text{H}$  NMR and  $^{13}\text{C}$  NMR spectrum for the comparison of dibromide, dichloride, and bromochloride.**

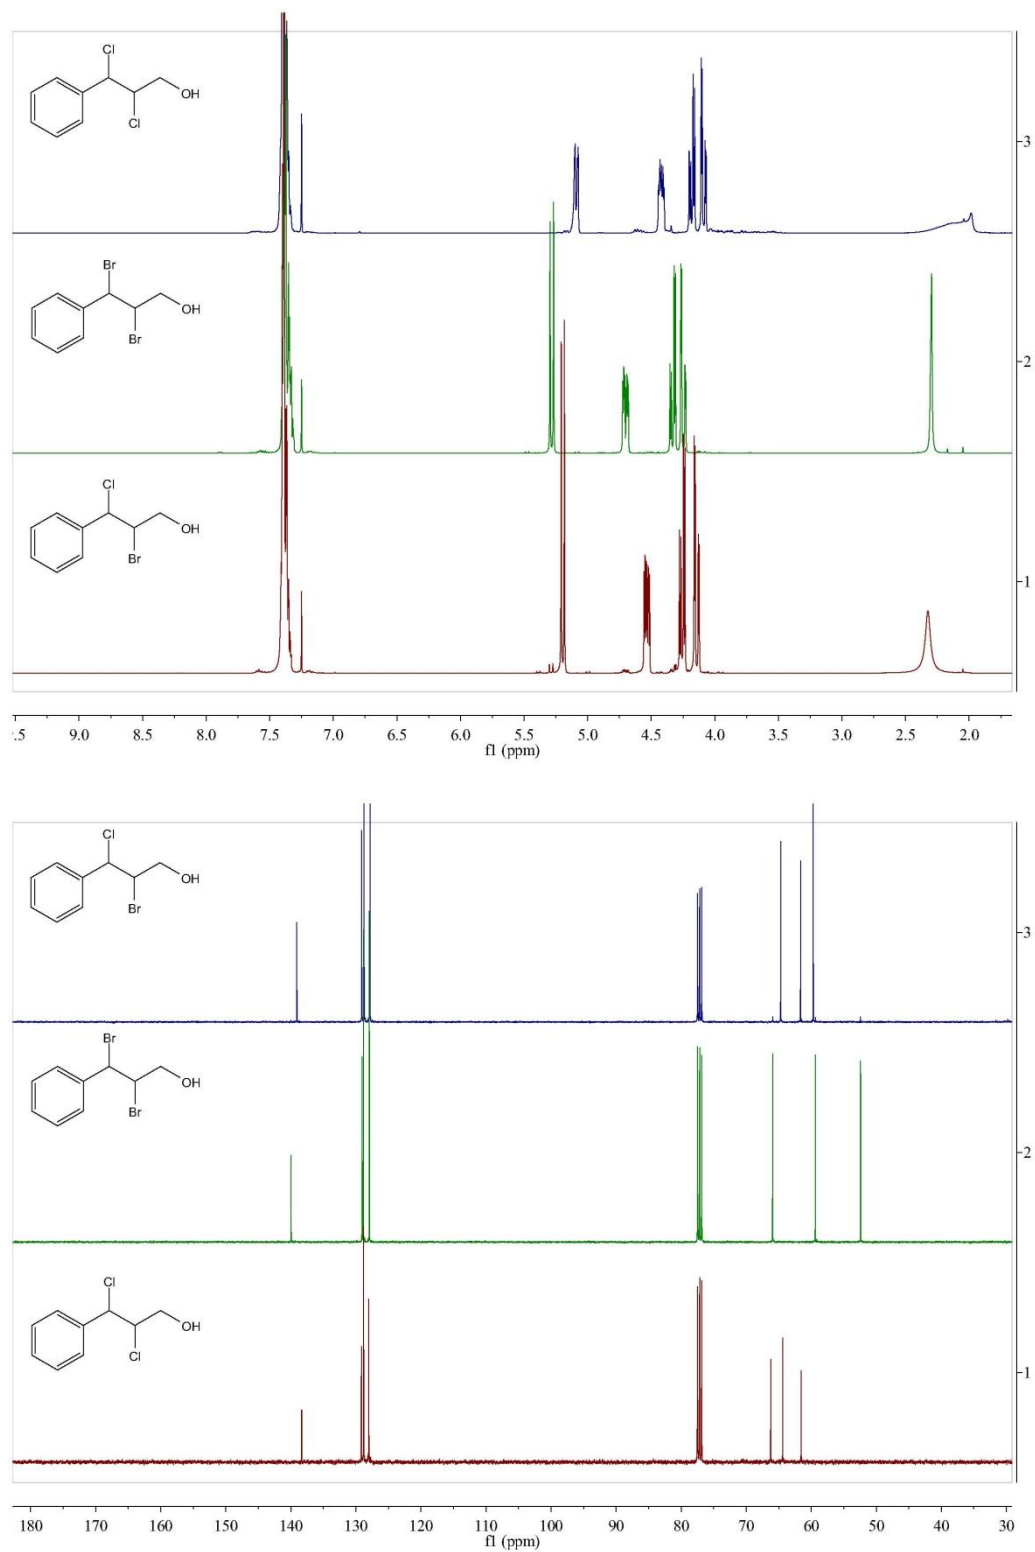

# NMR spectra for Ligand

## L-B1

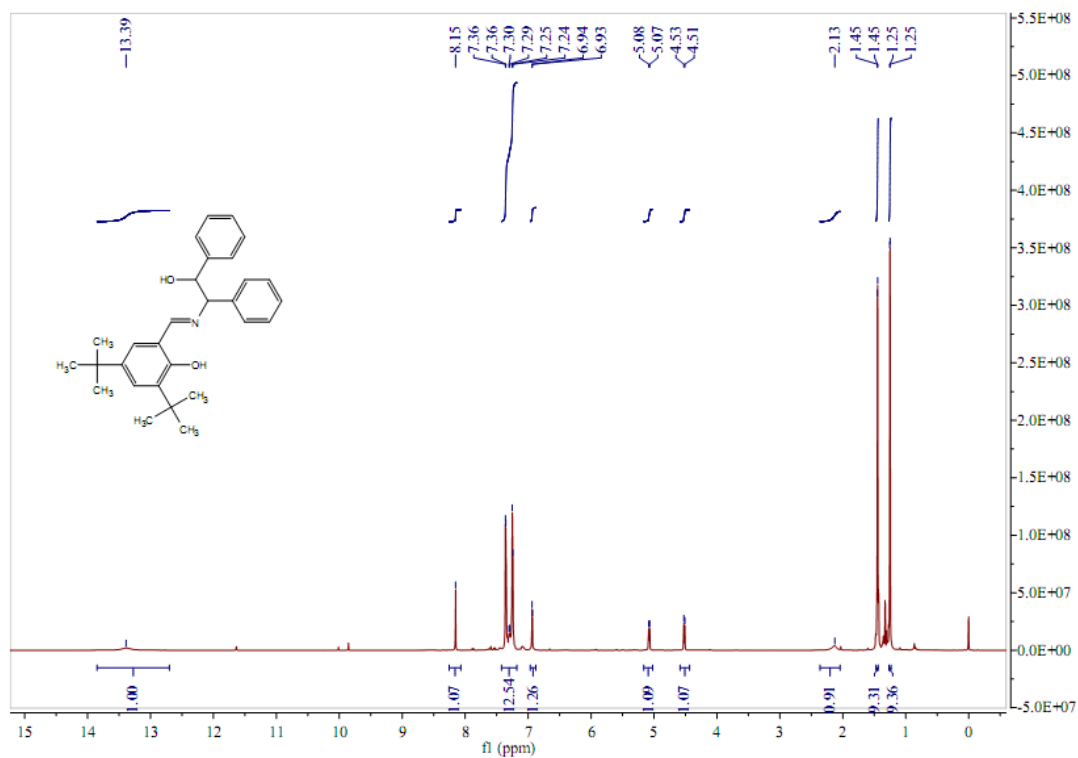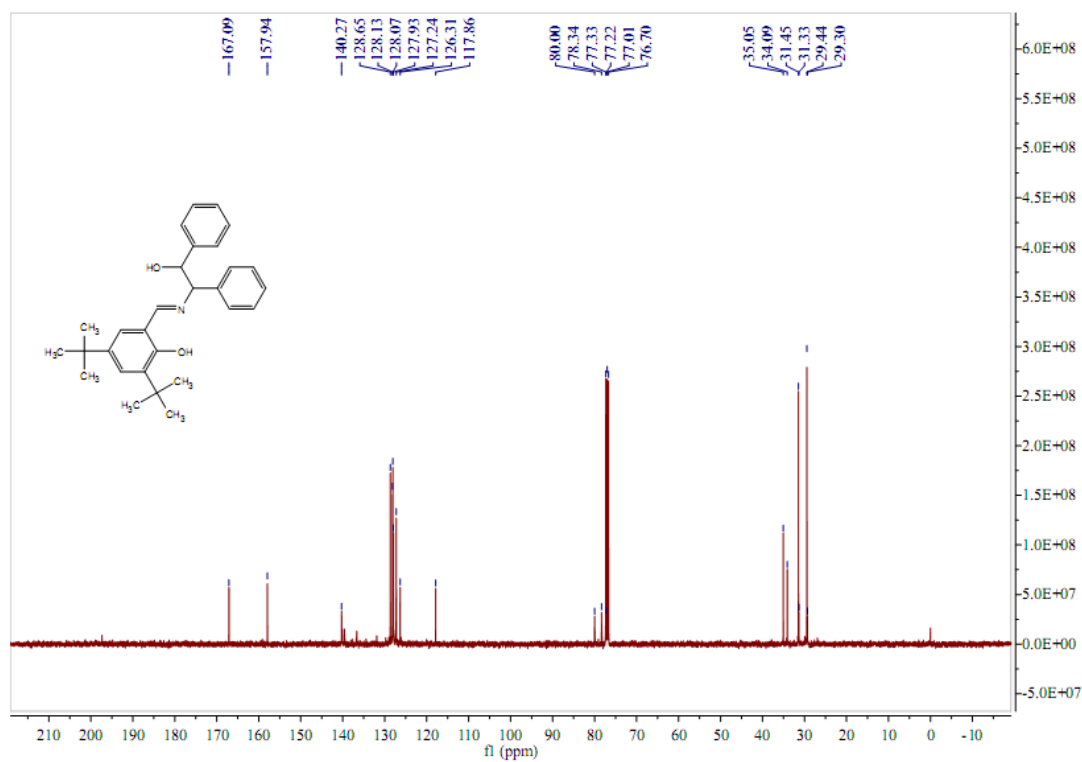

L7

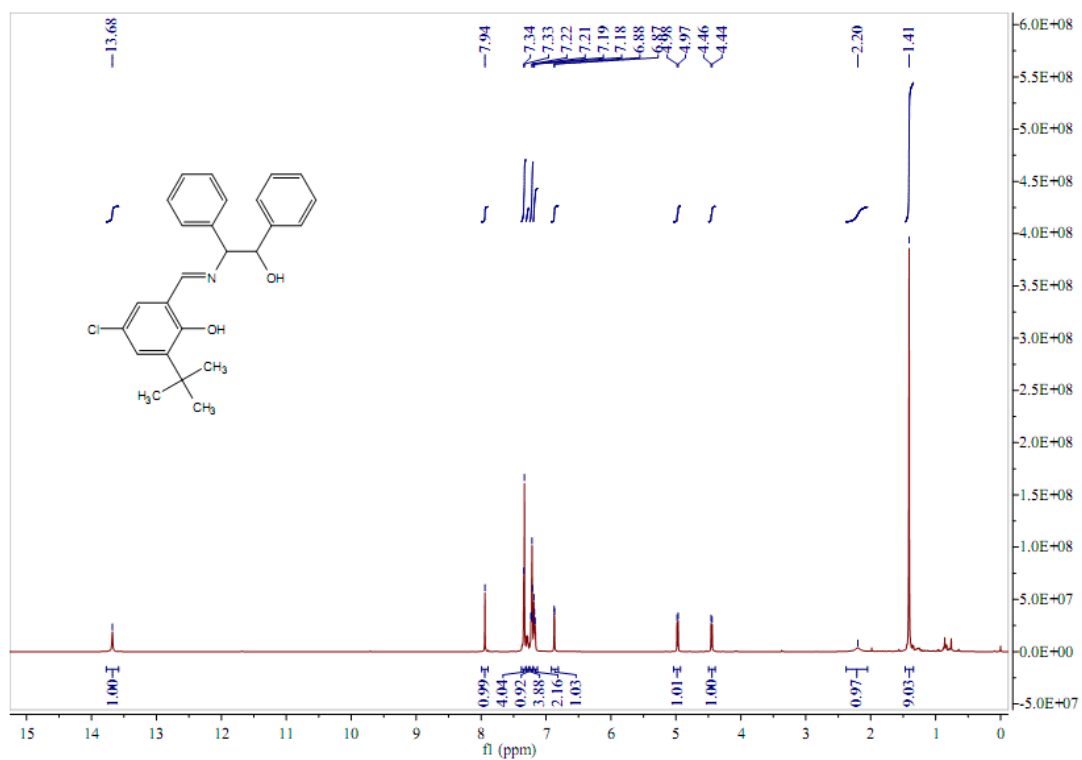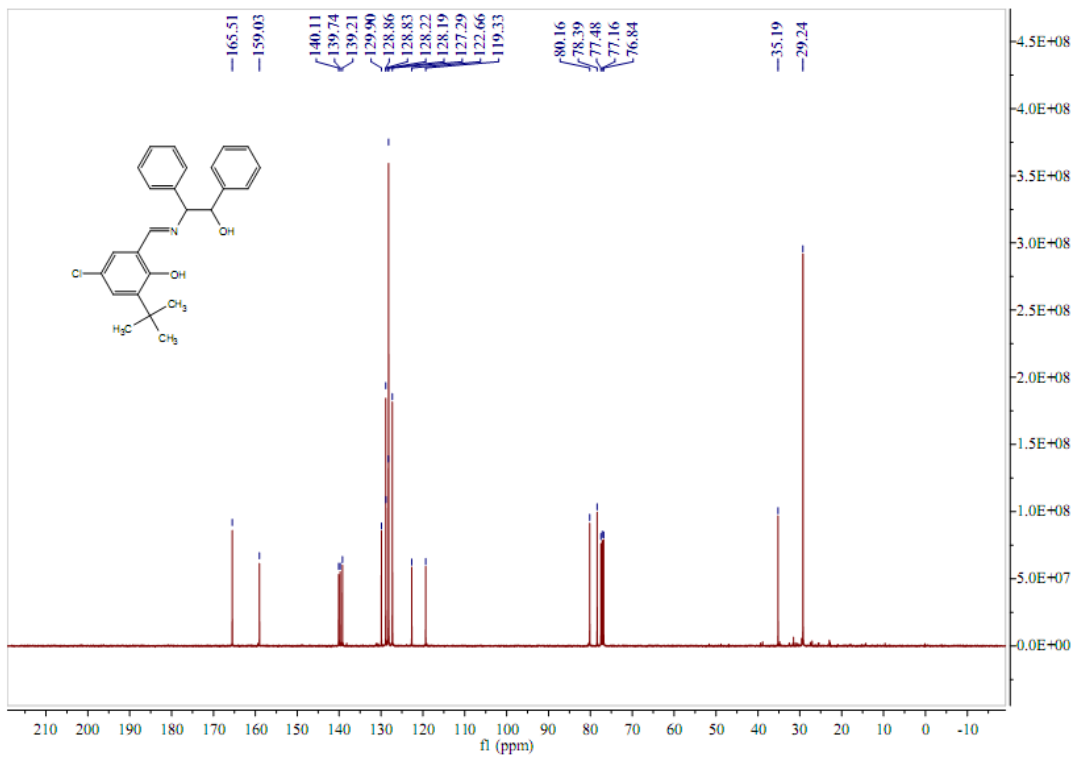

L13

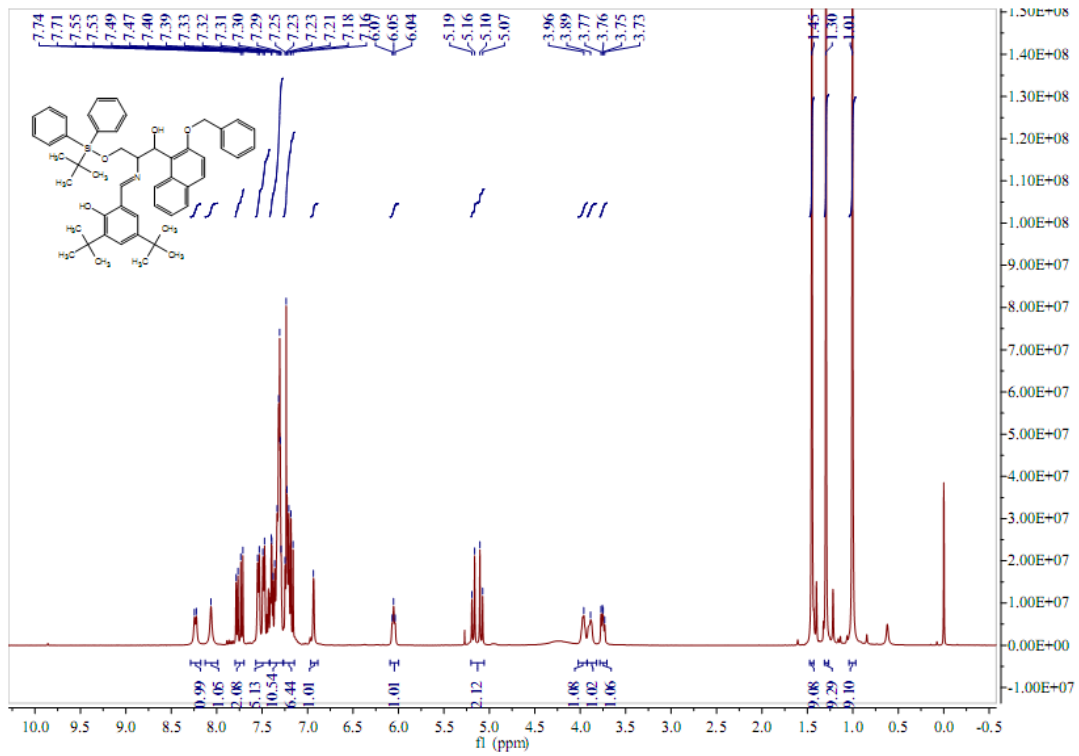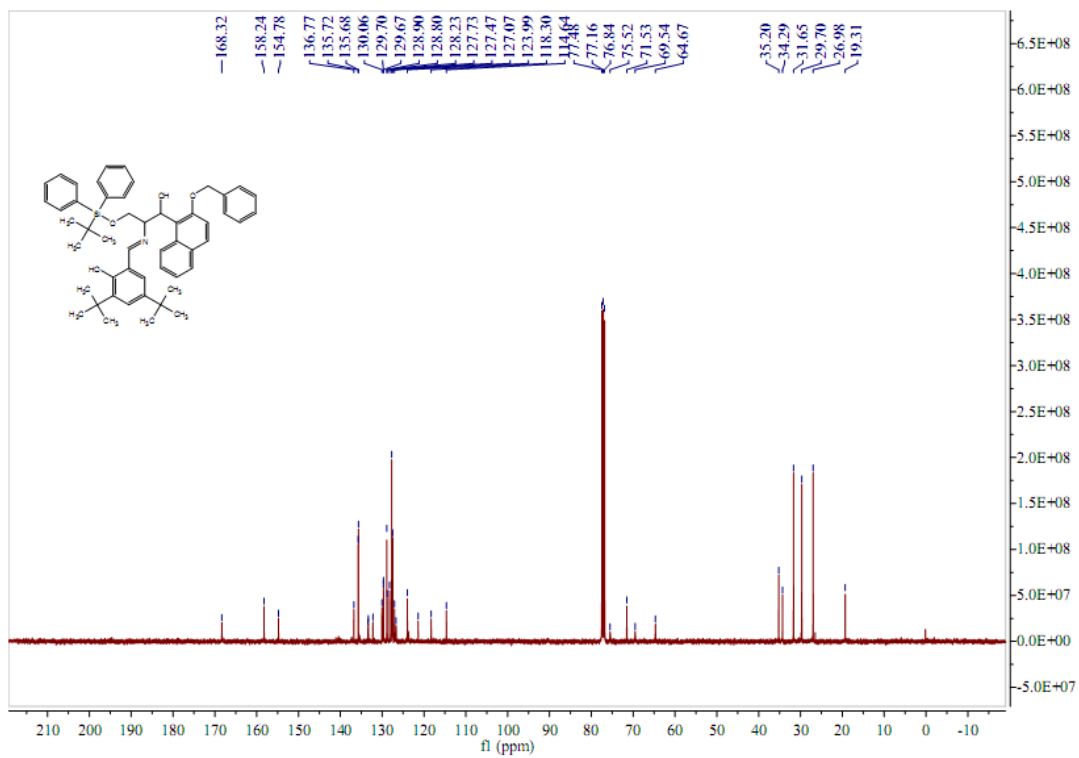

L14

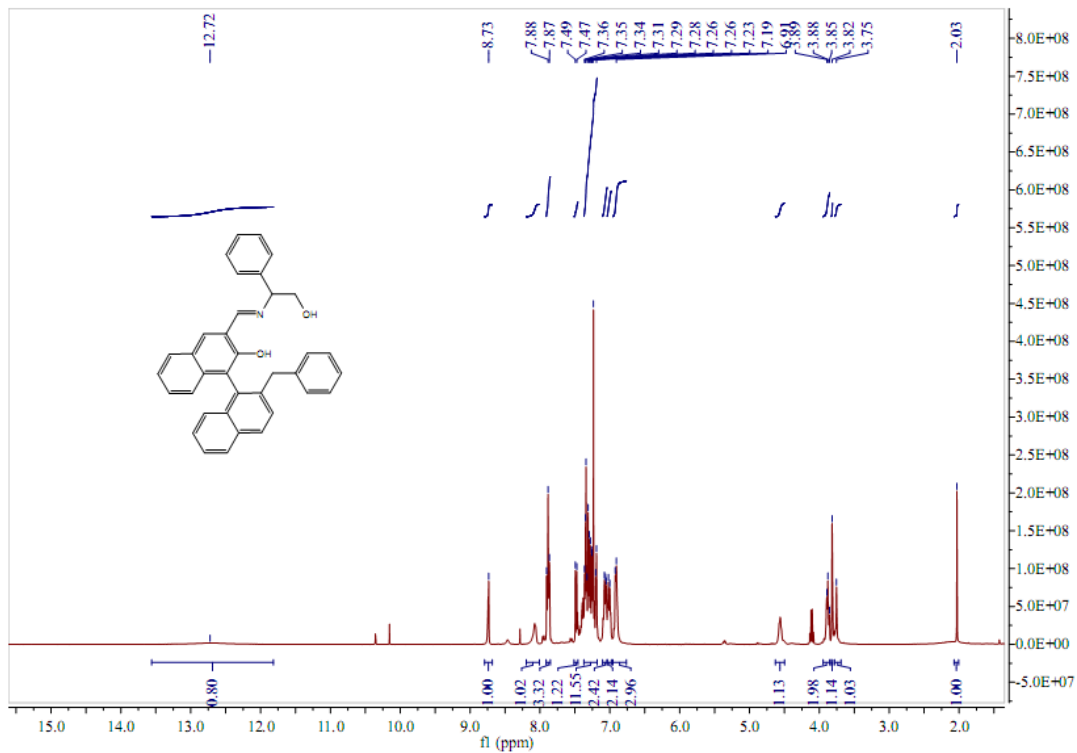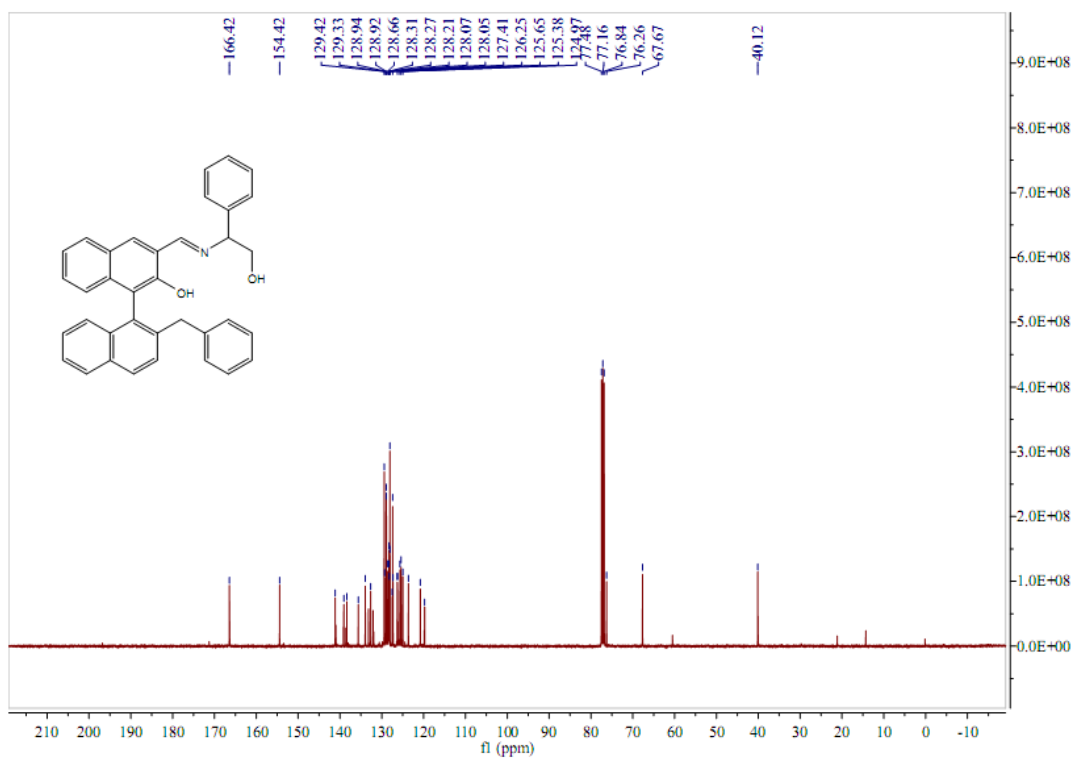

L15

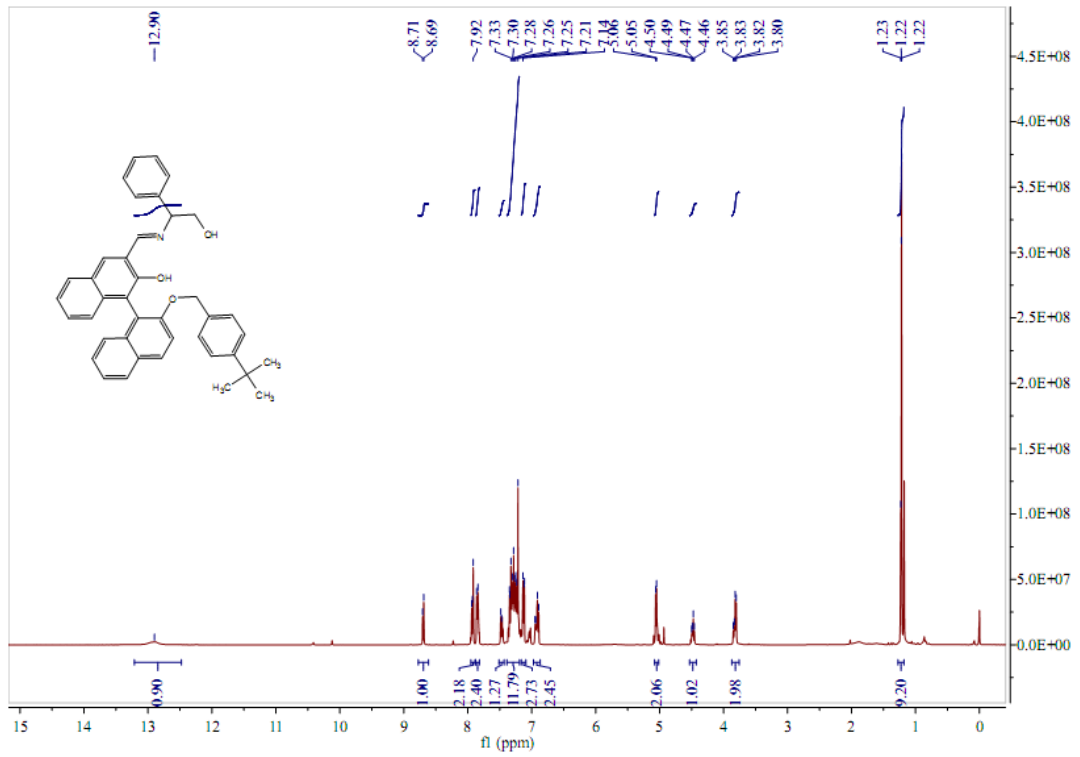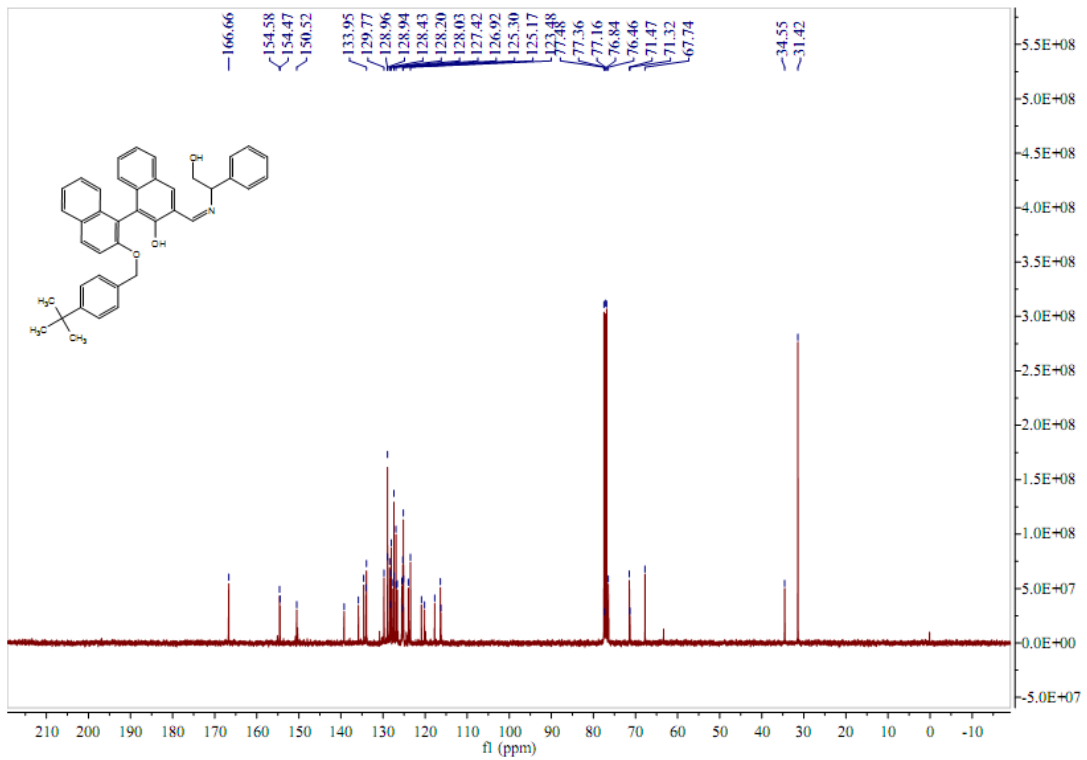

L16

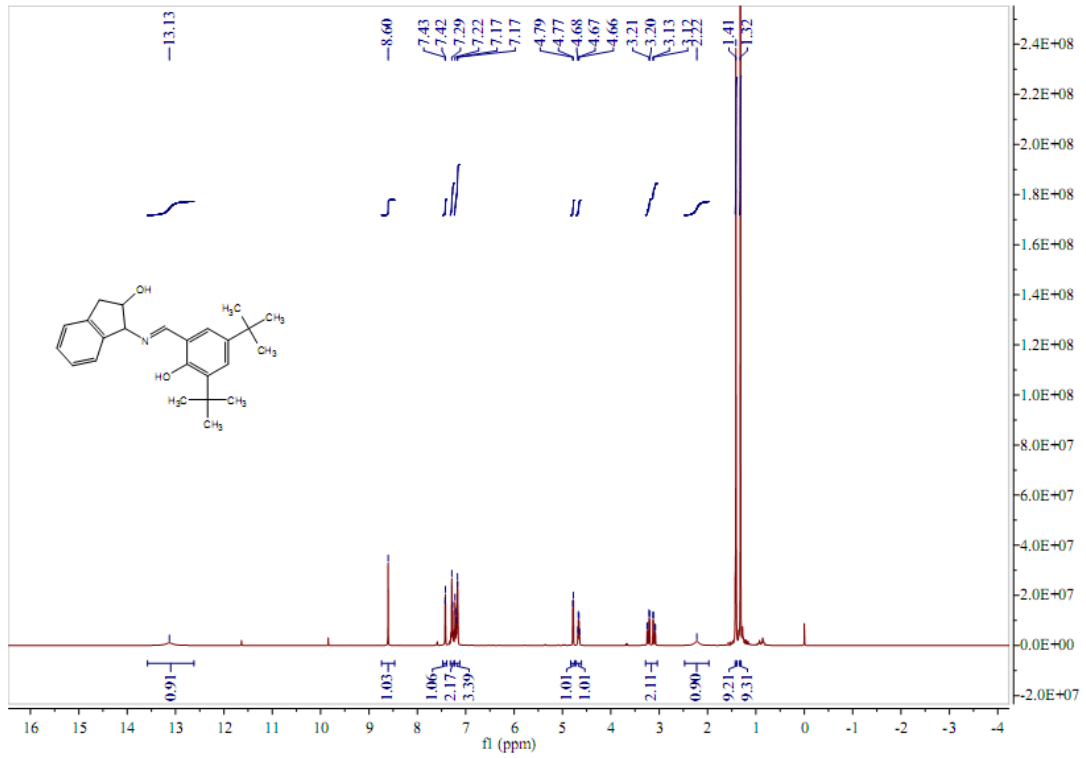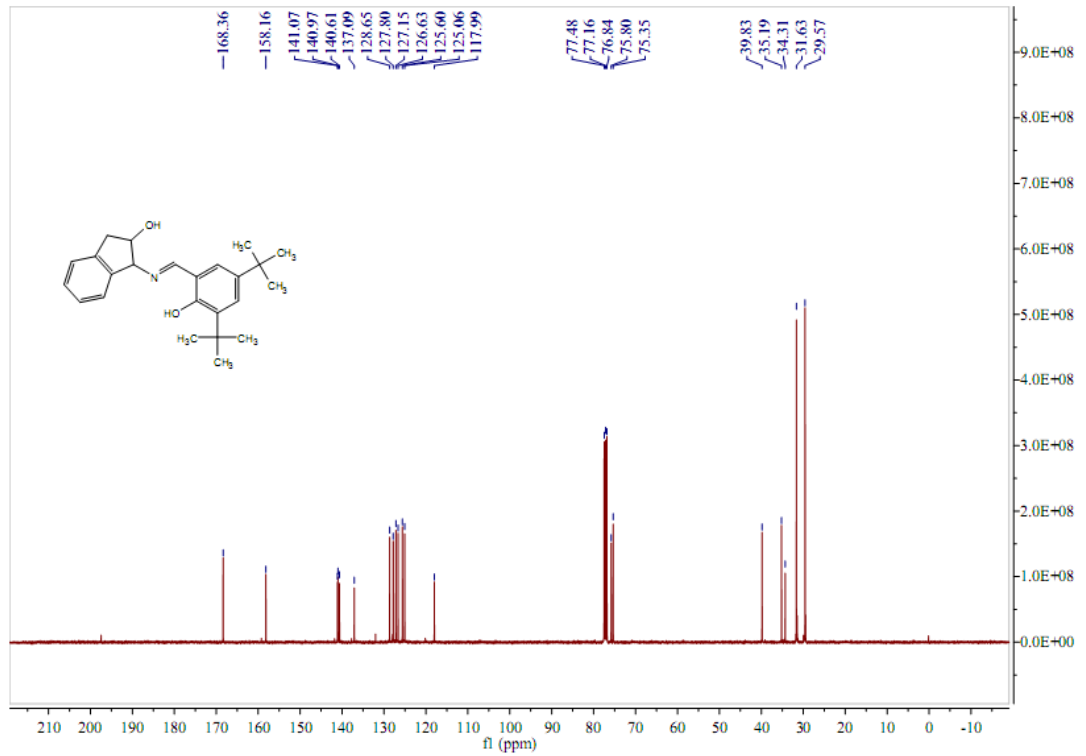

L17

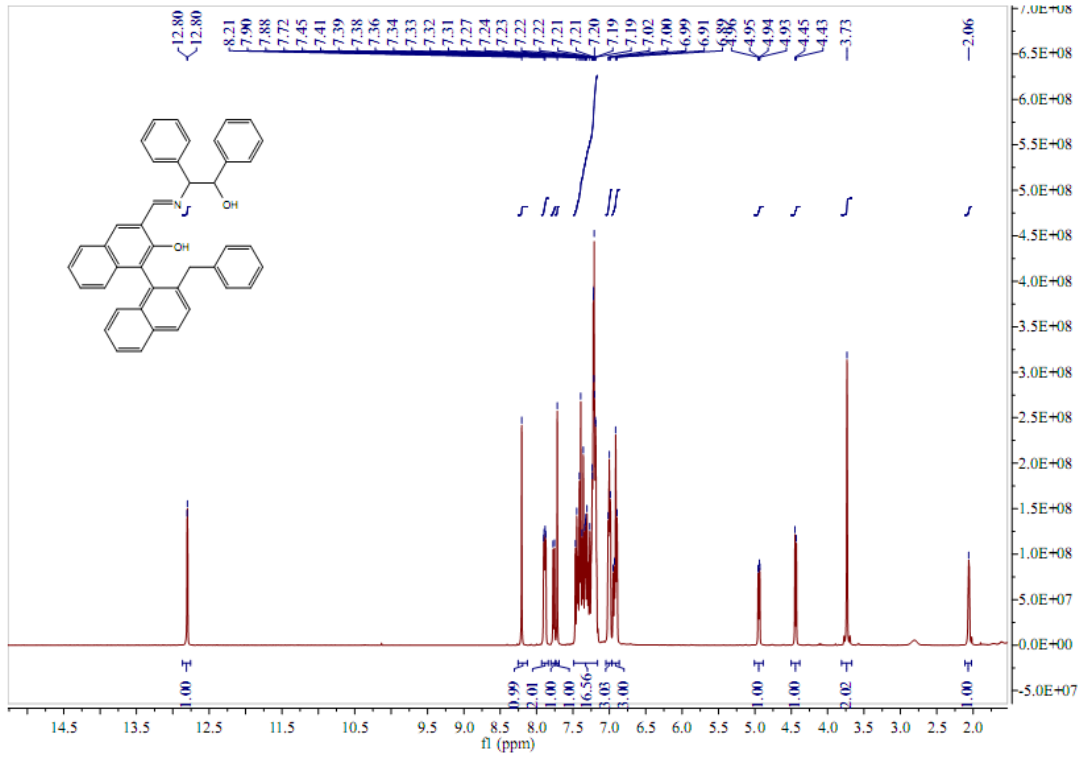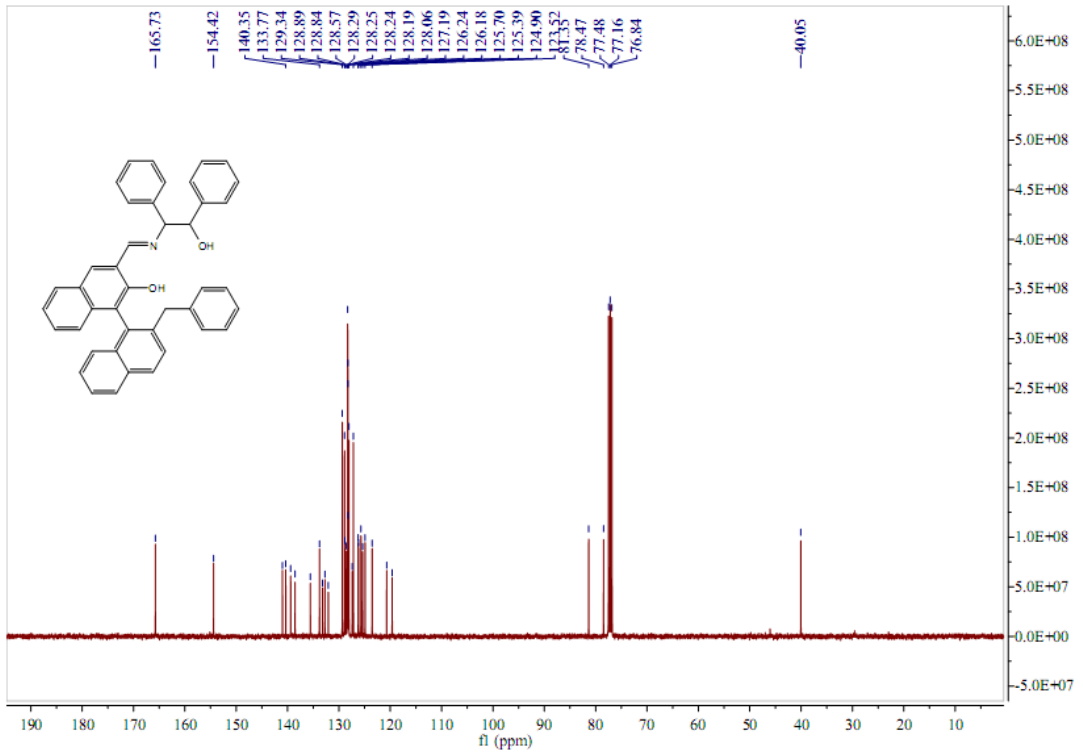



L18

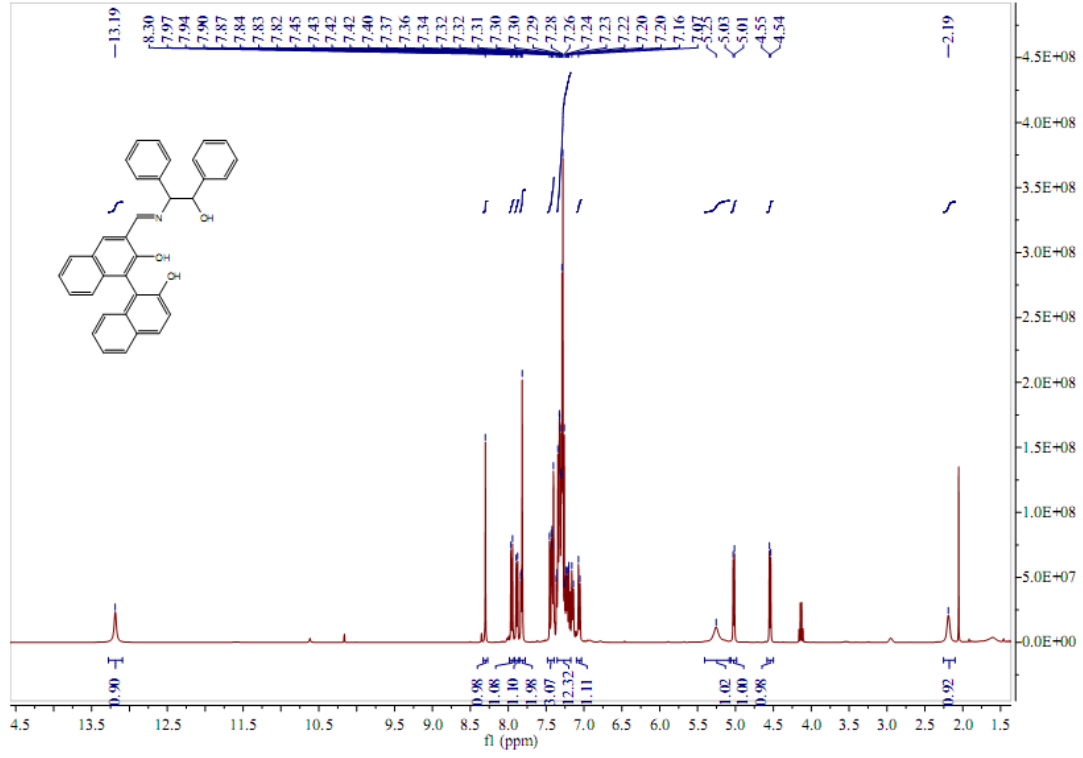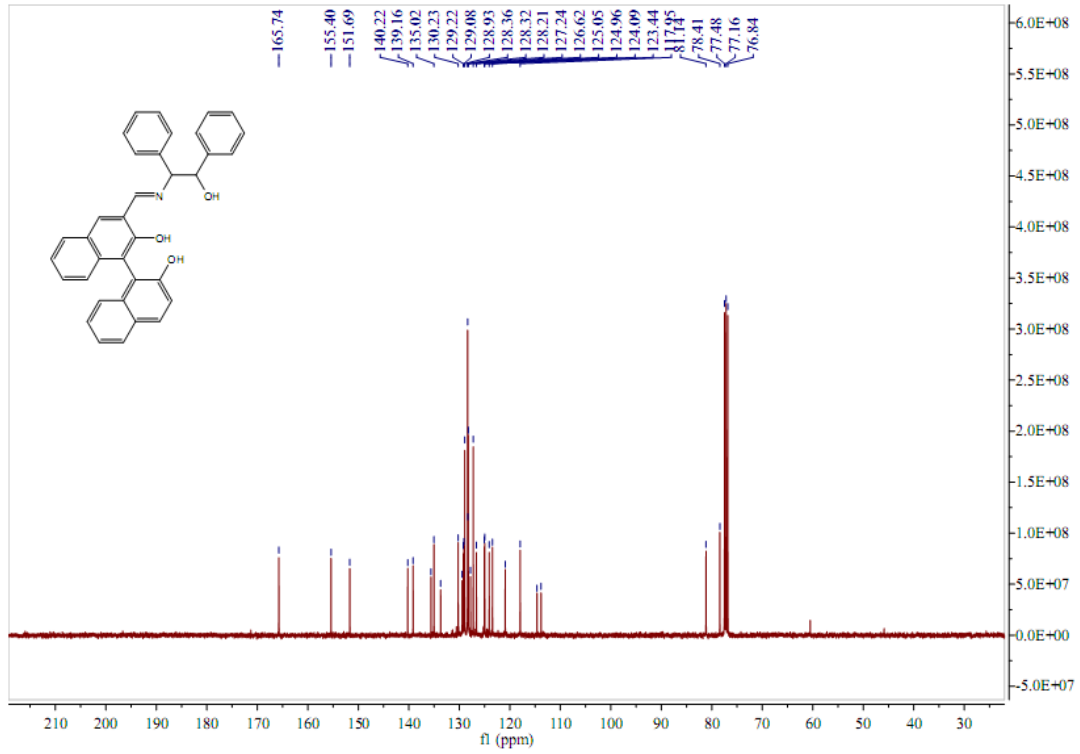

L19

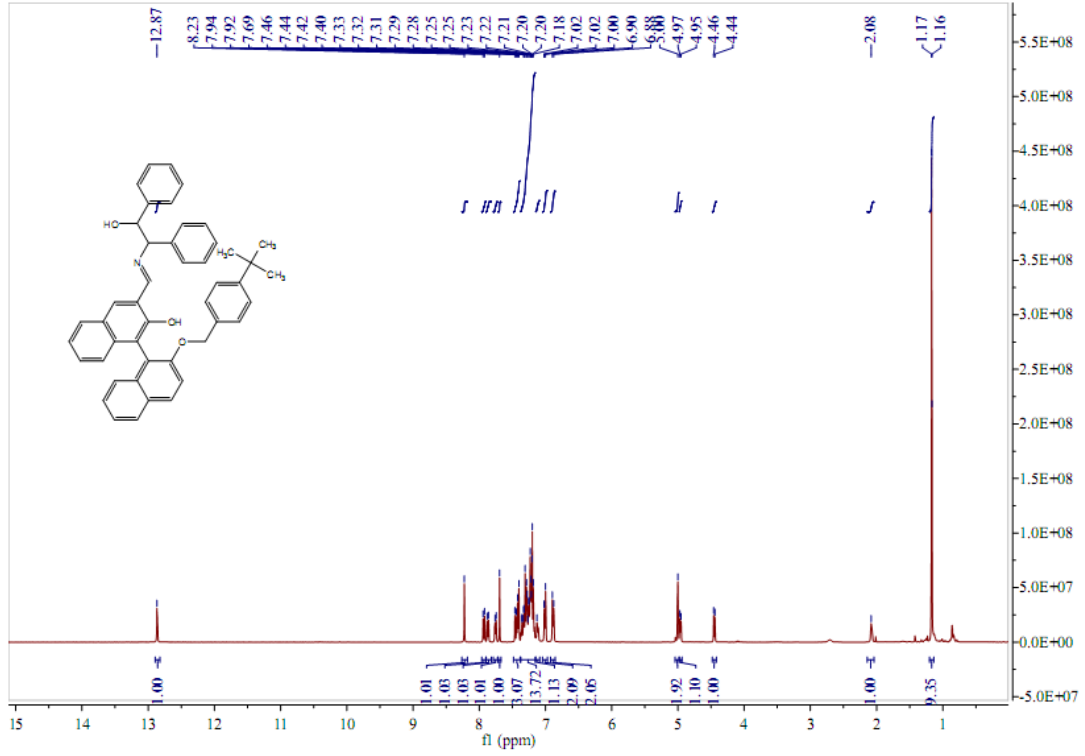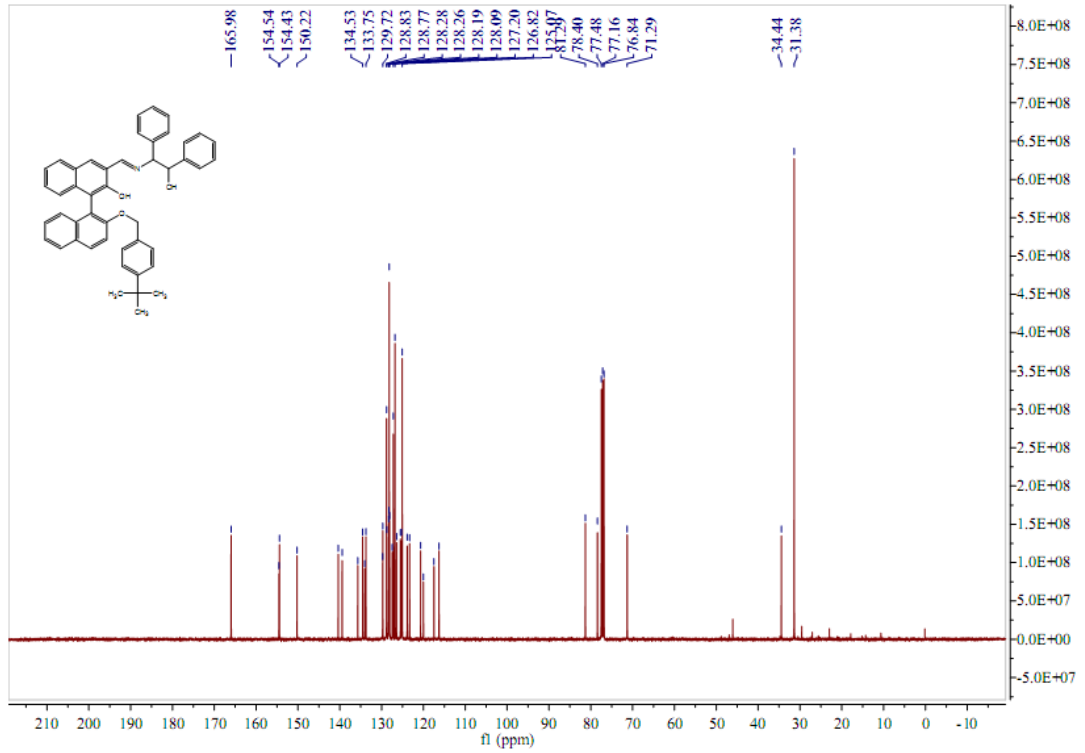

L20

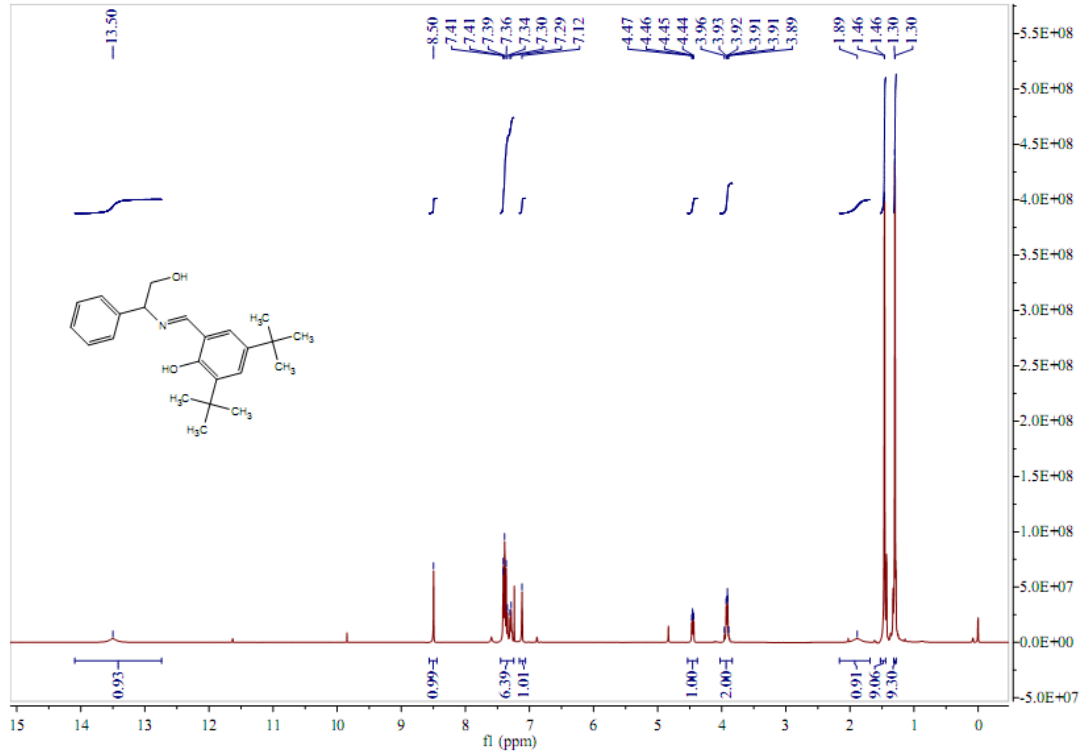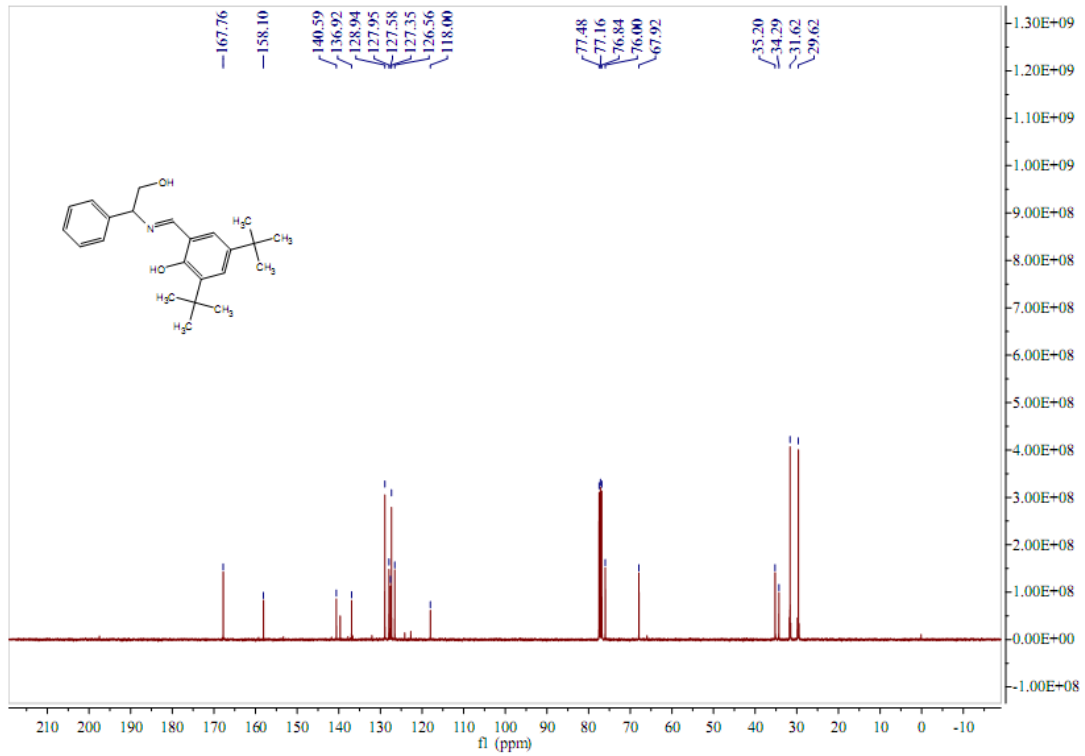

L21

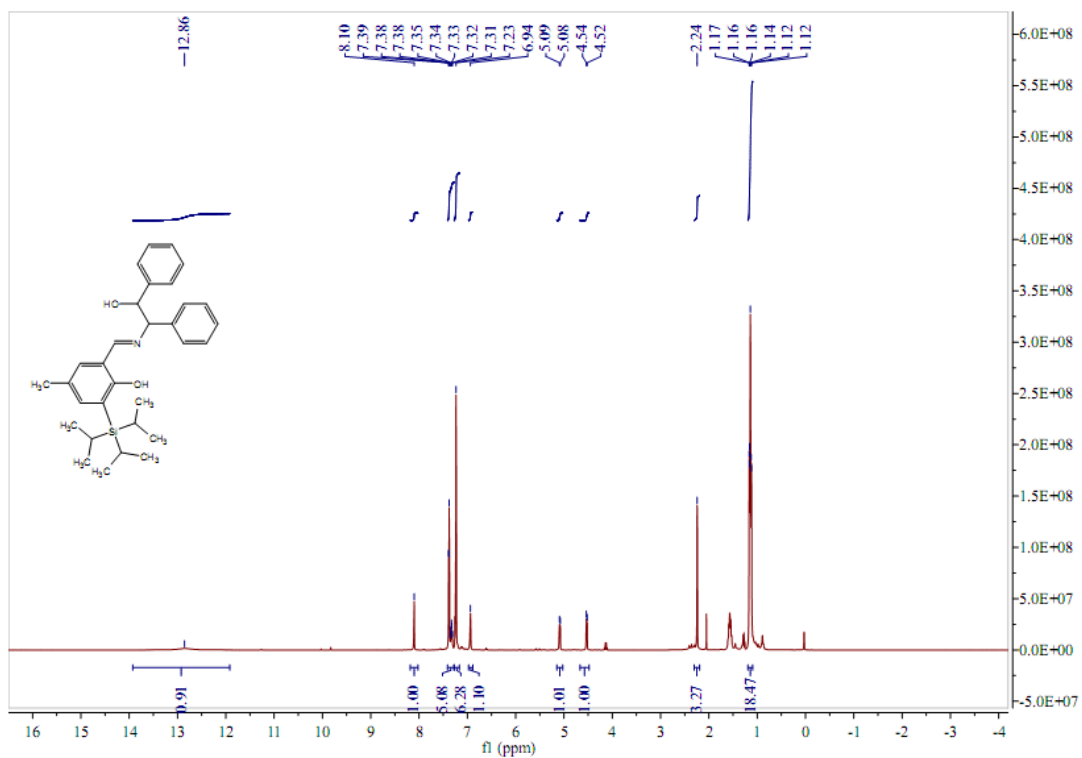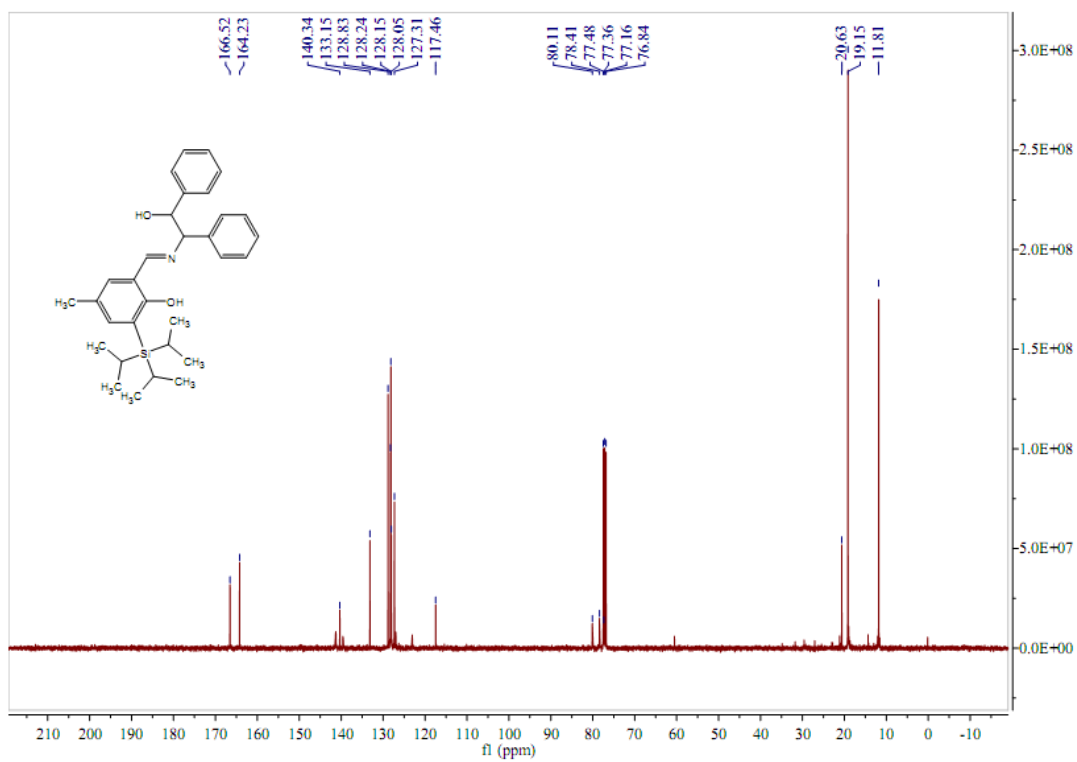

L22

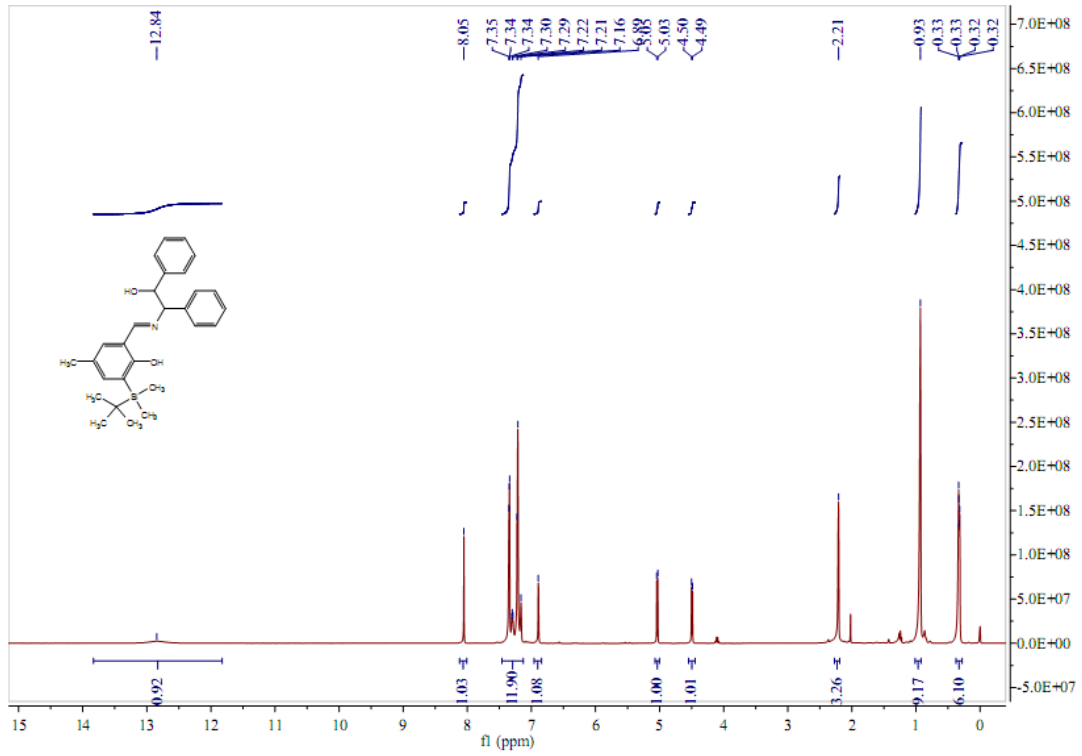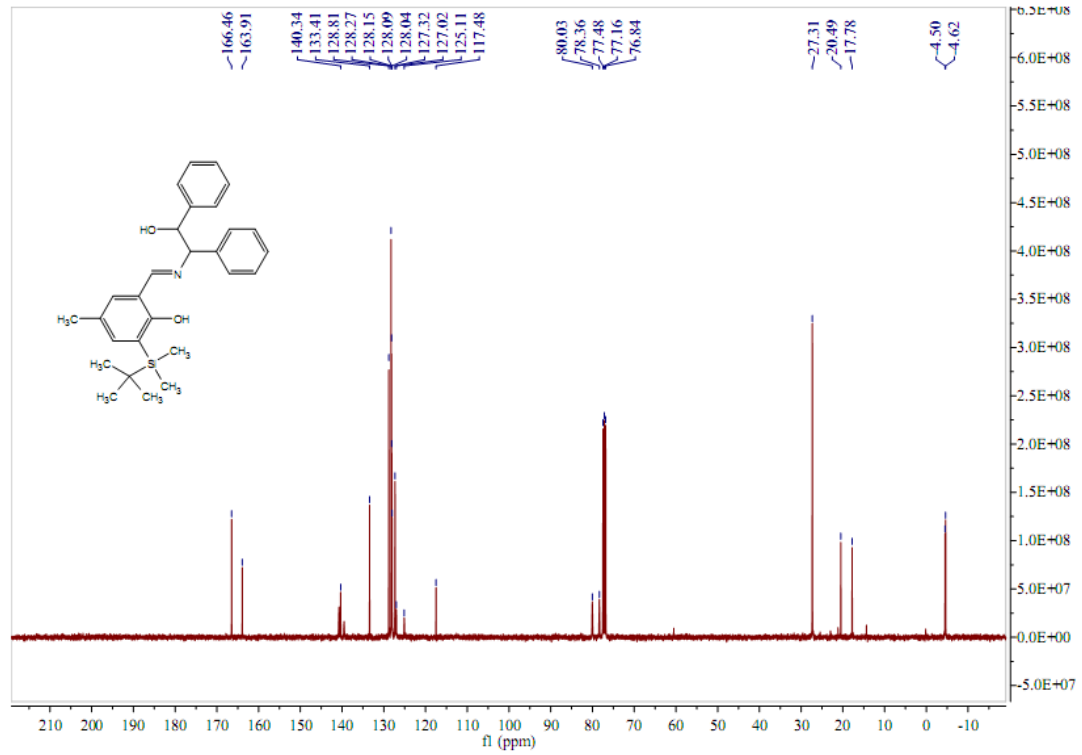

L23

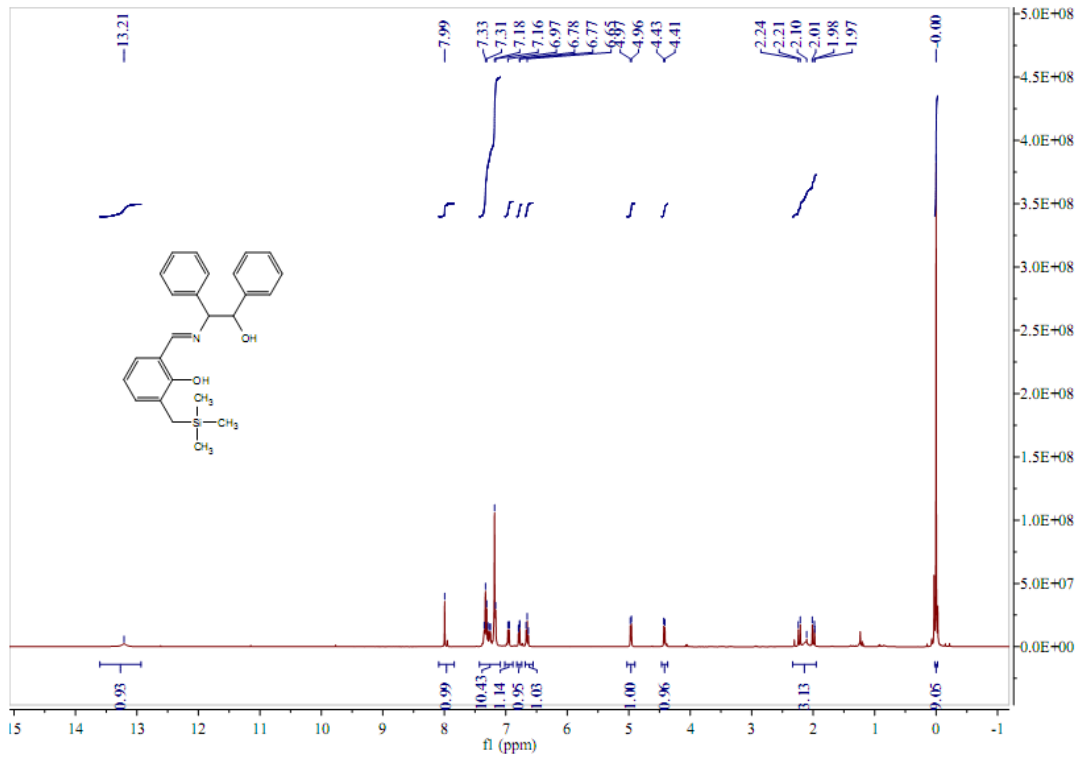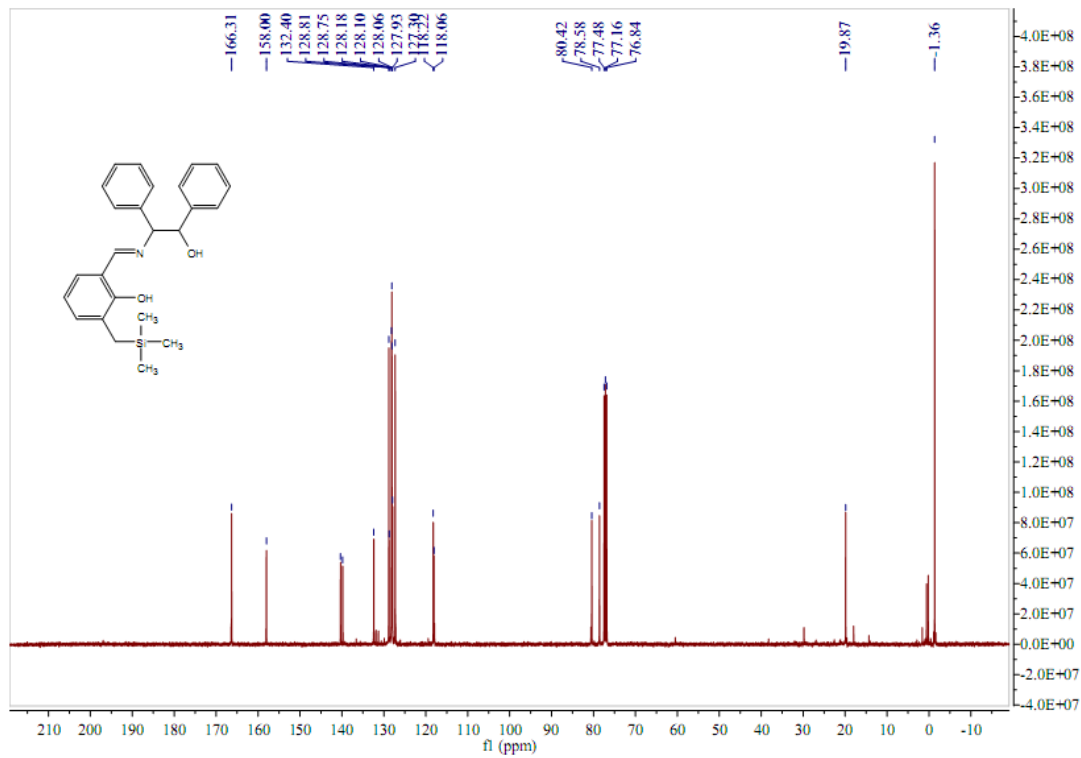

L24

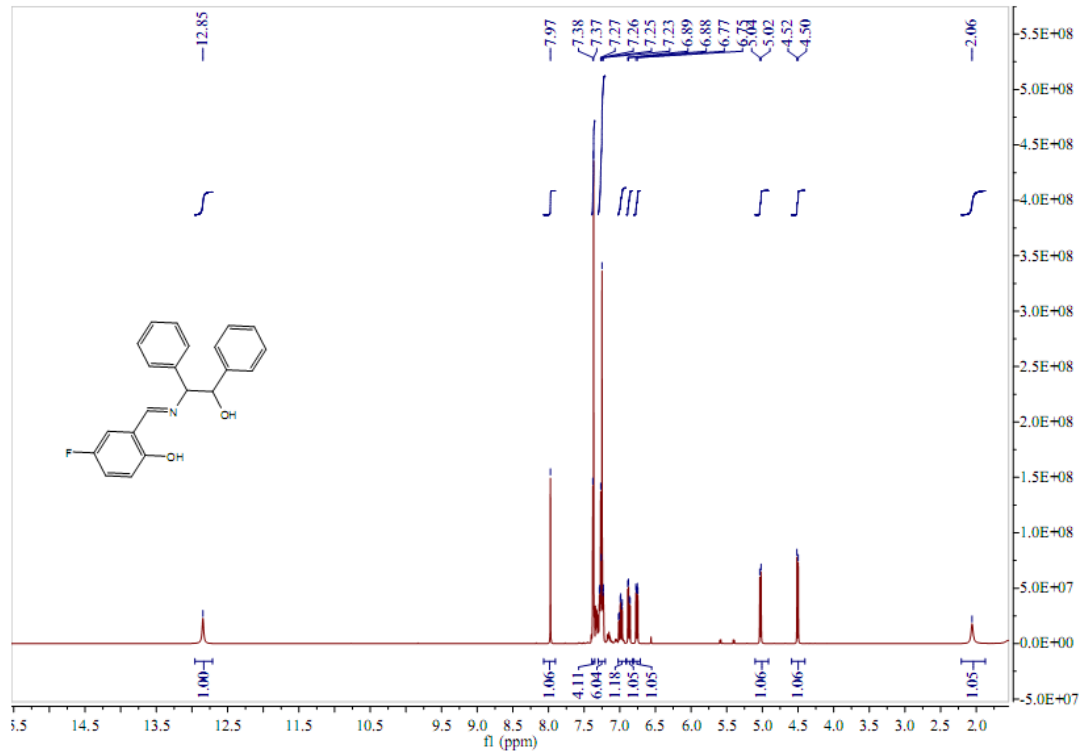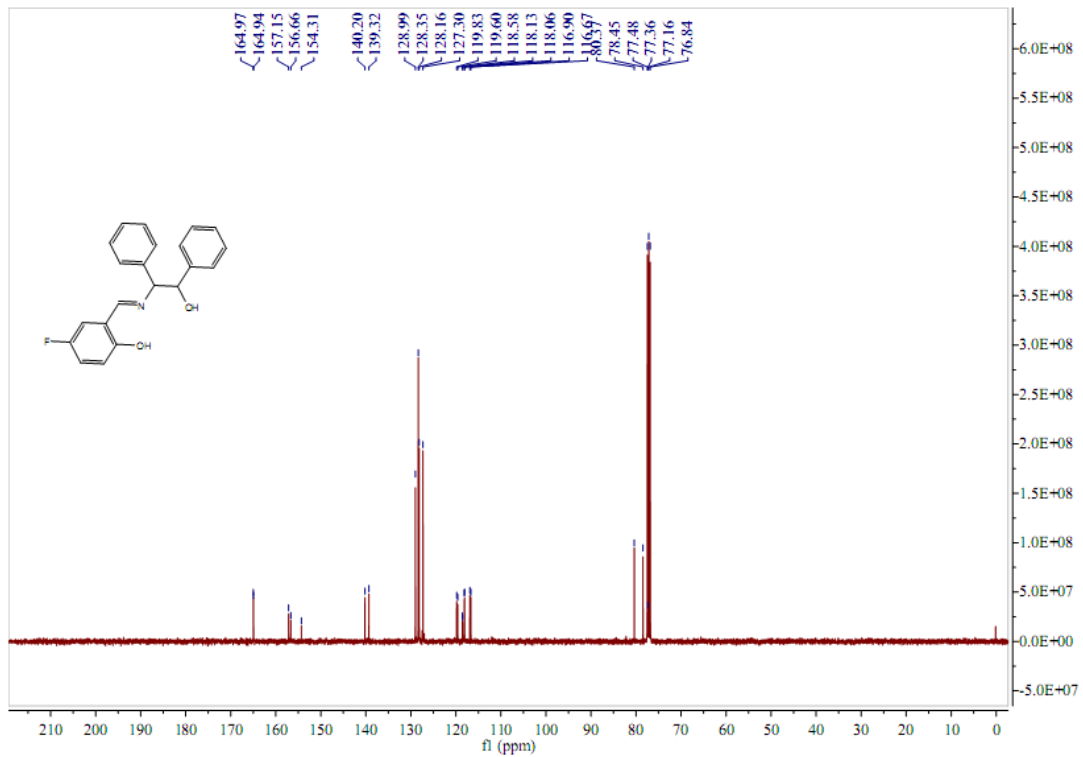

L25

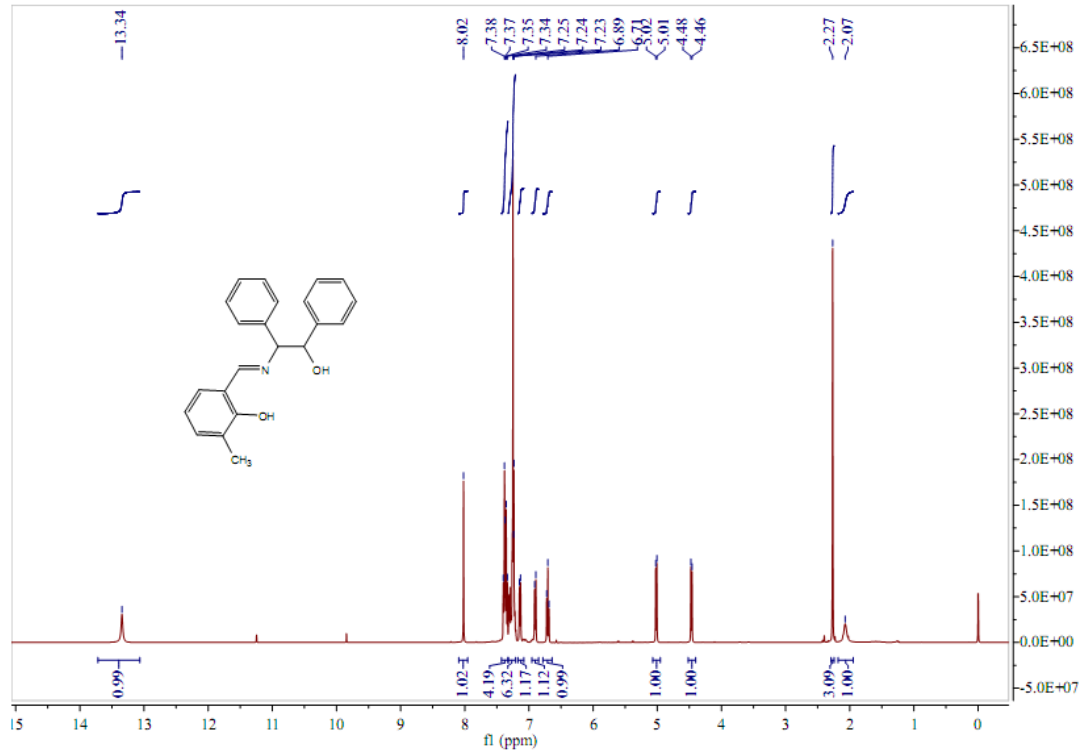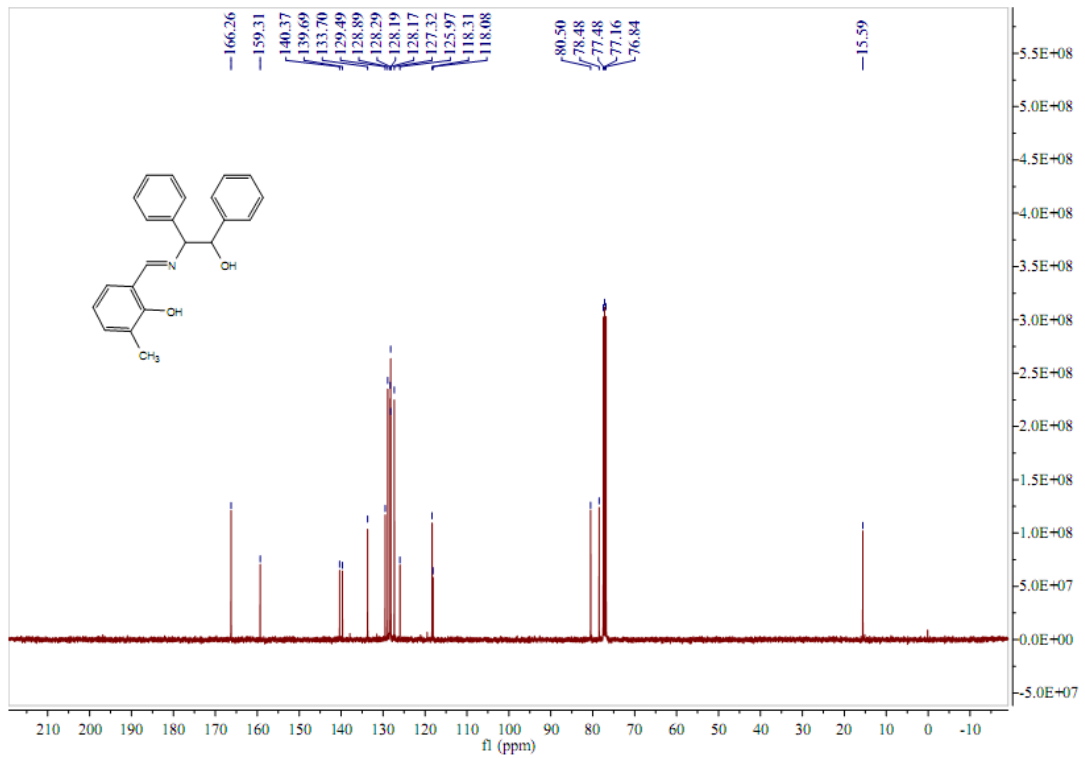



L26

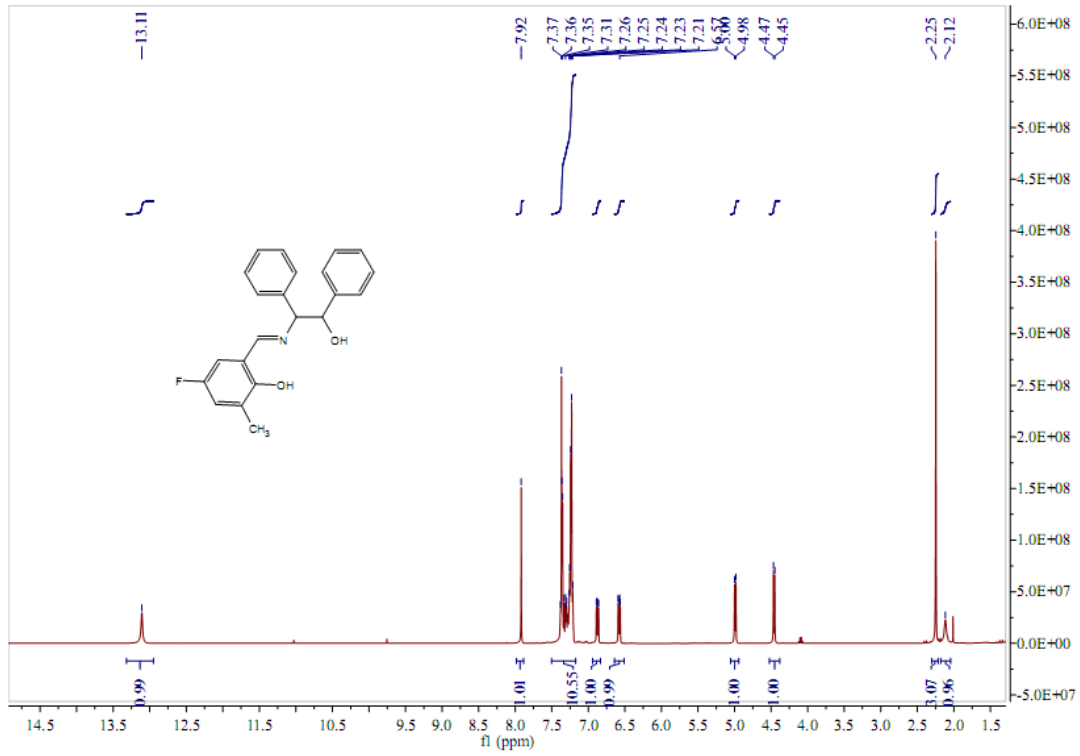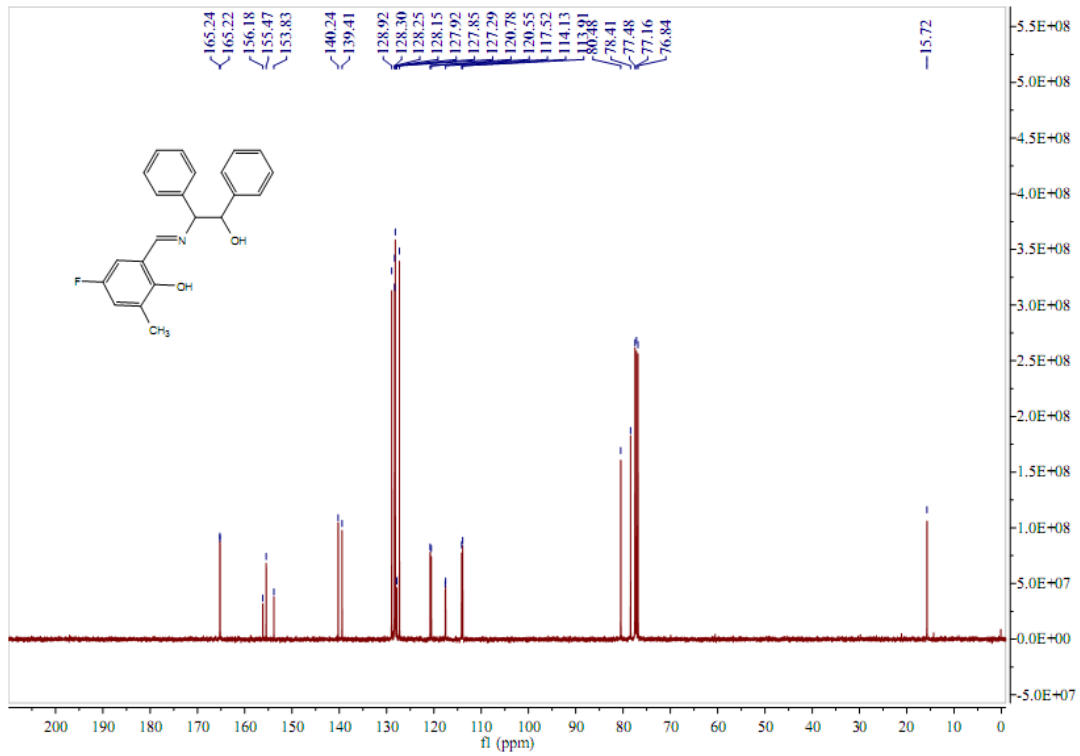

L27

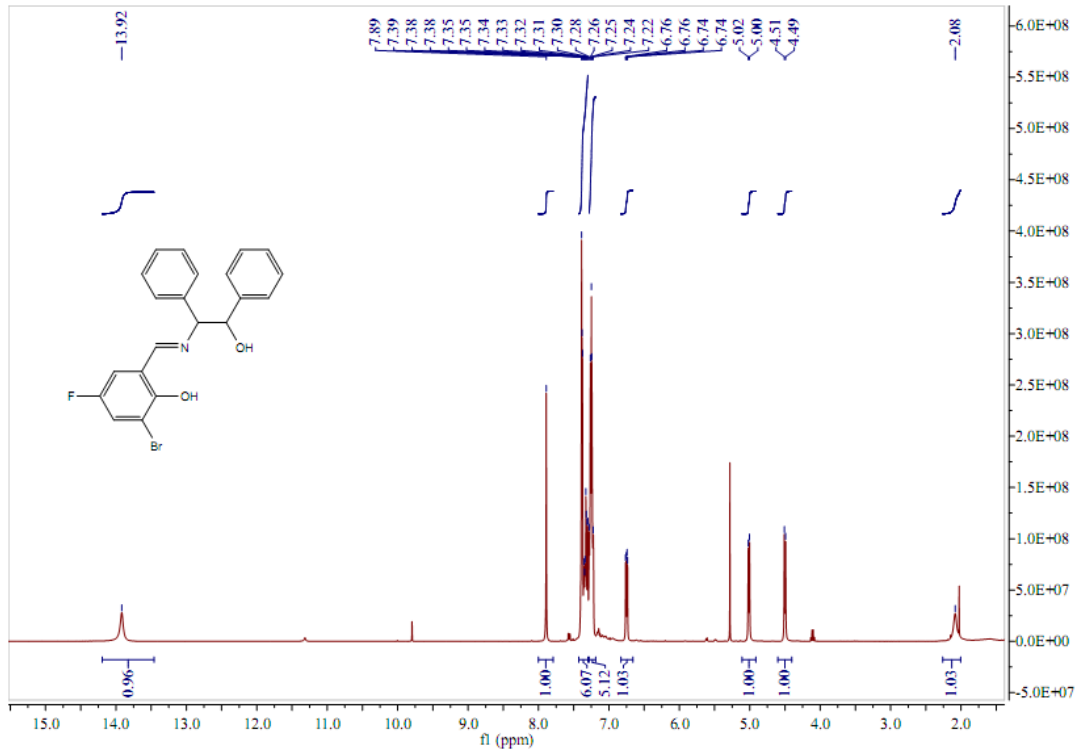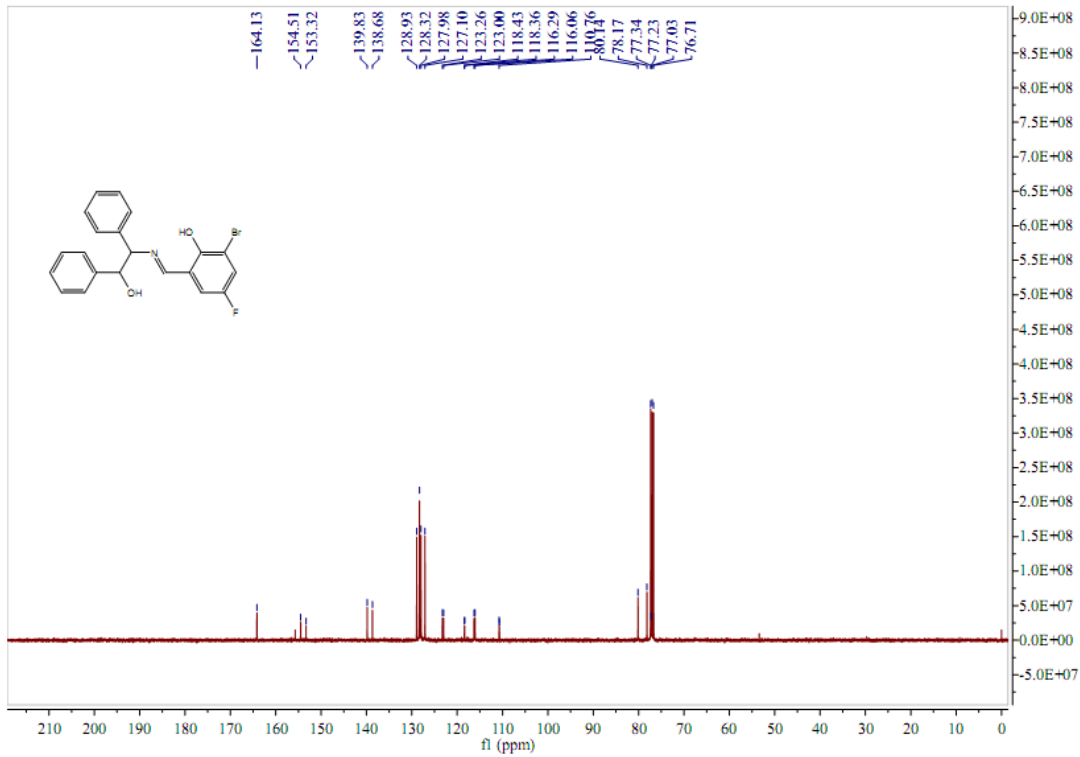

L28

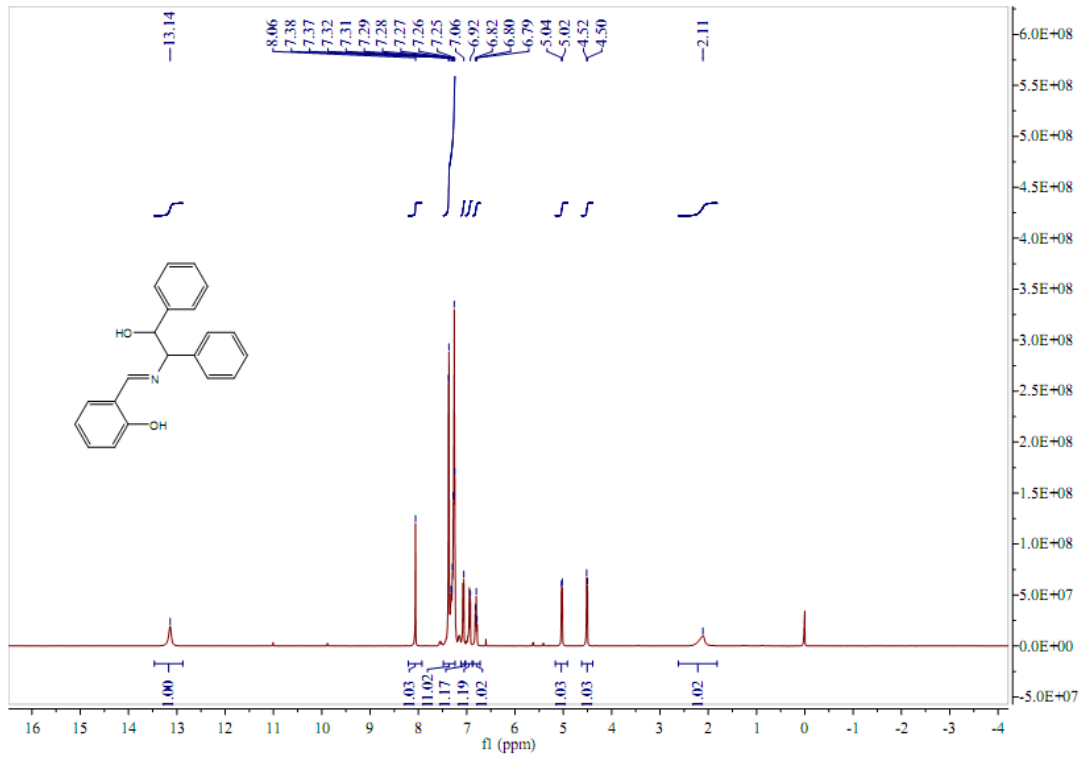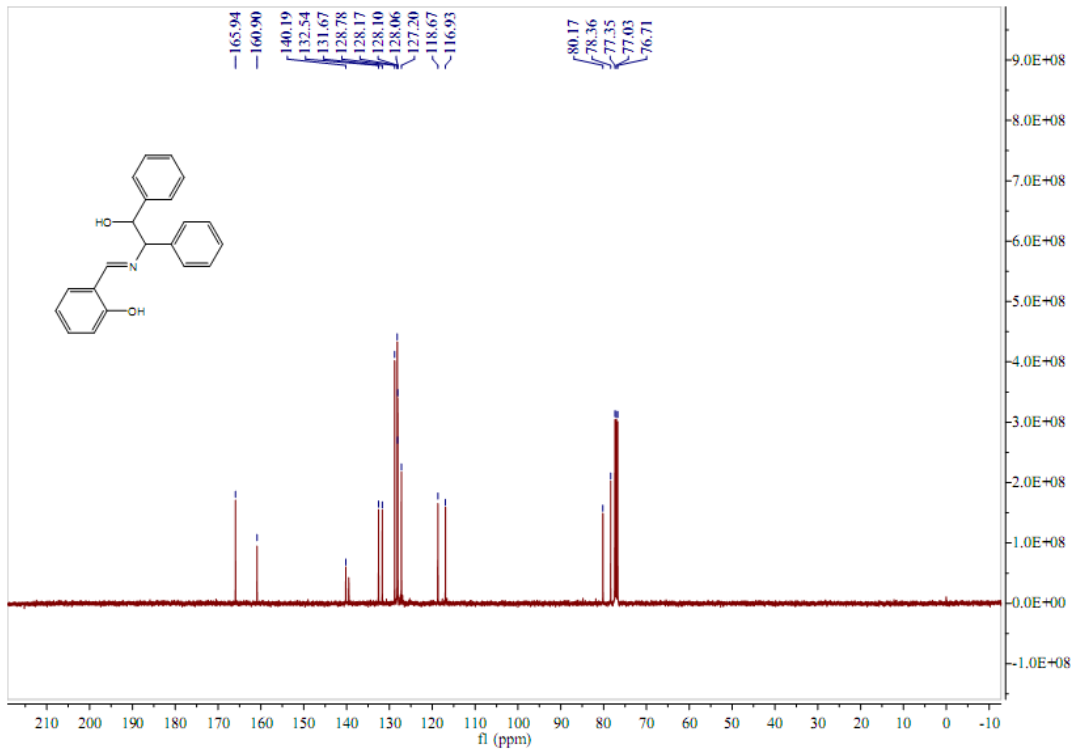

# L29

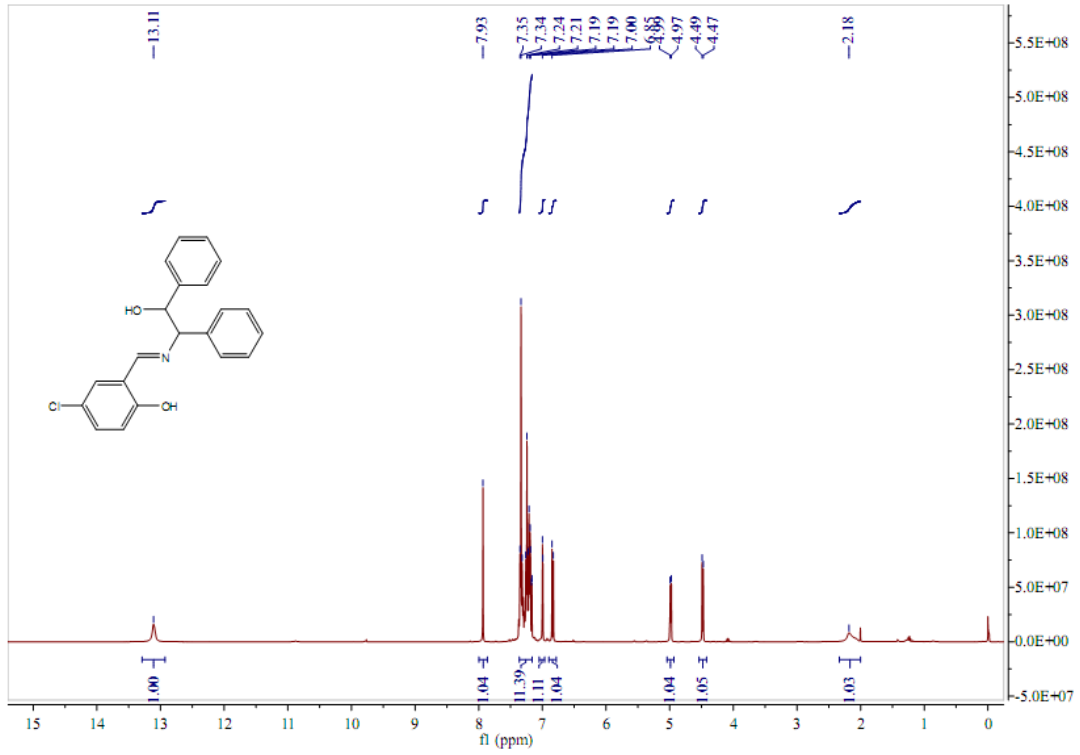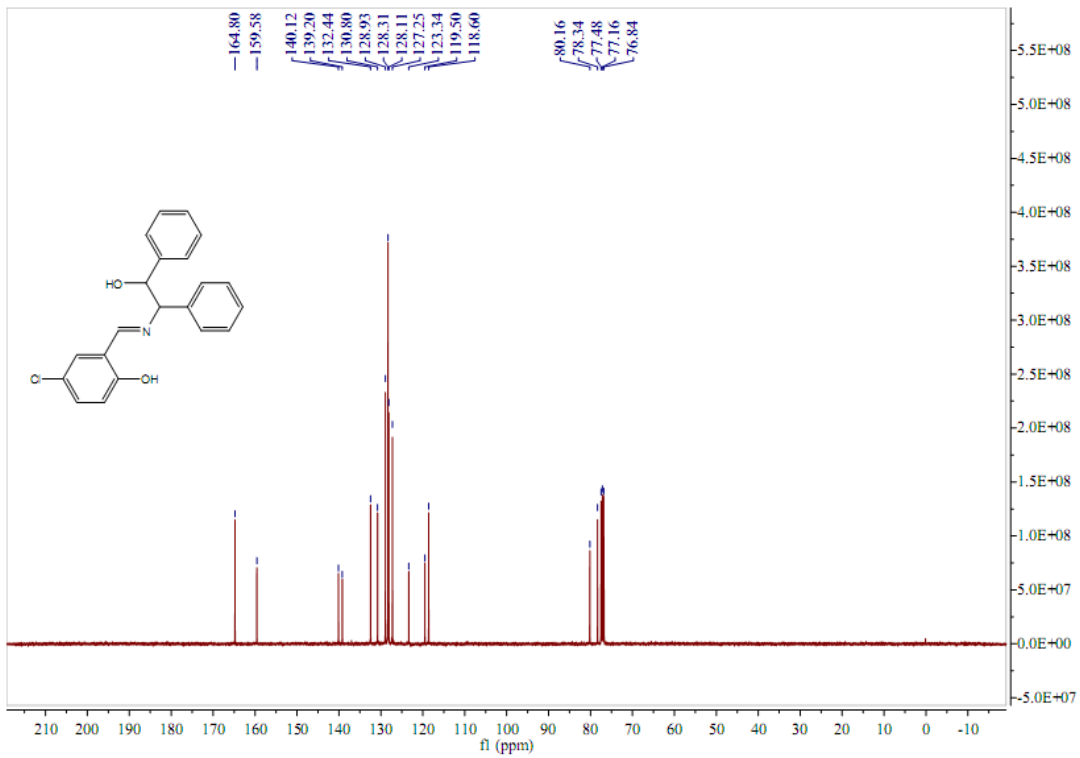

# L30

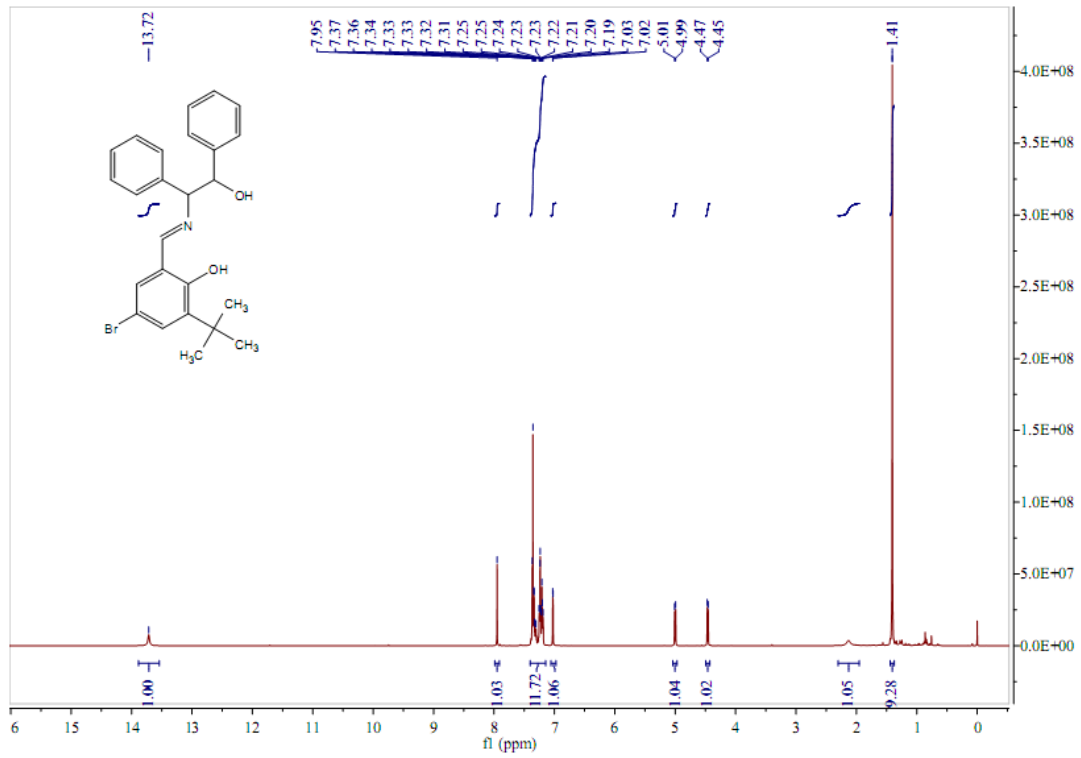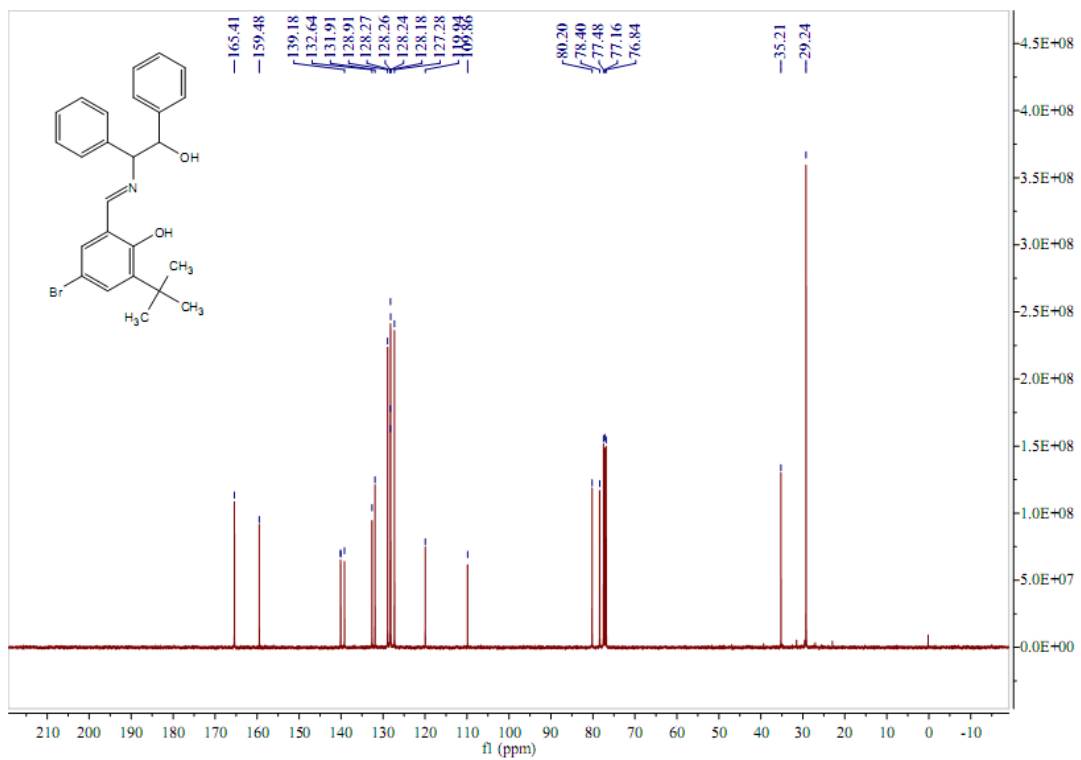

## NMR spectra for Di-halide Products.

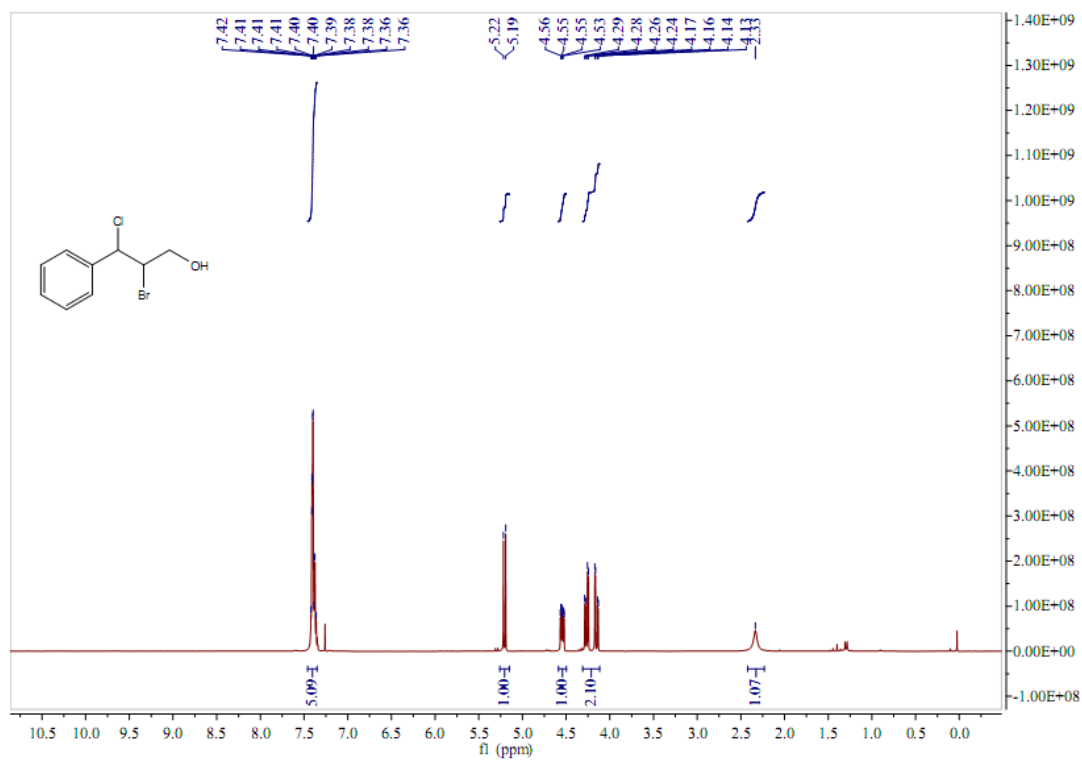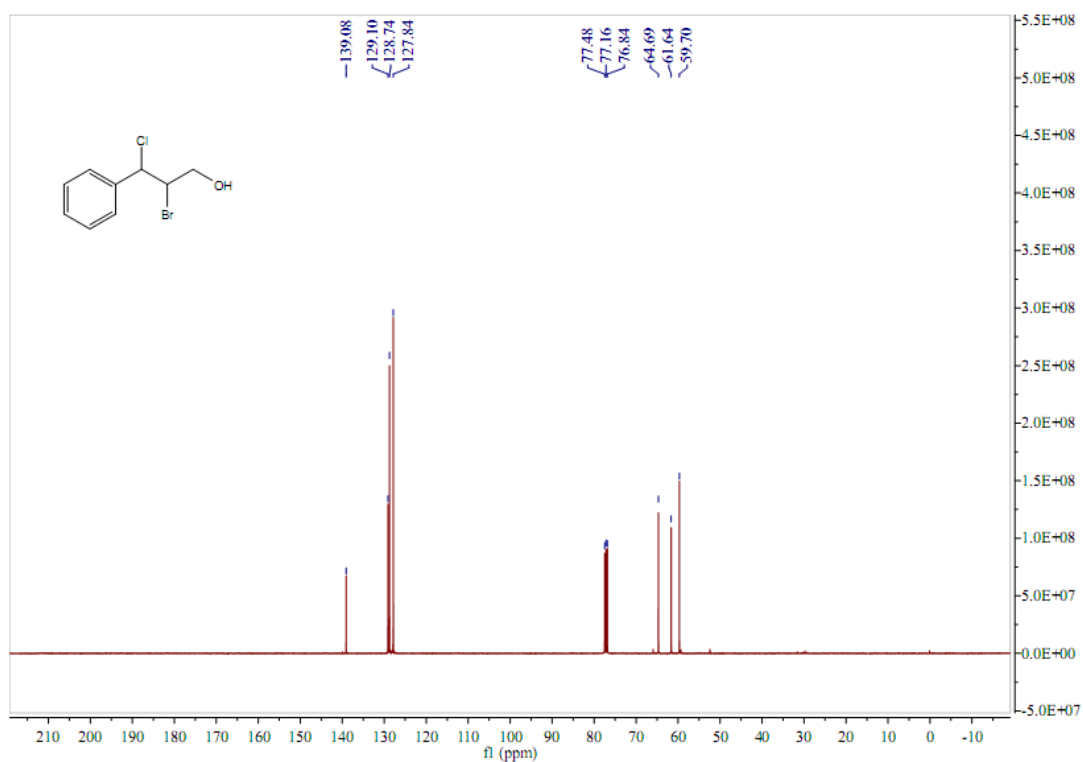

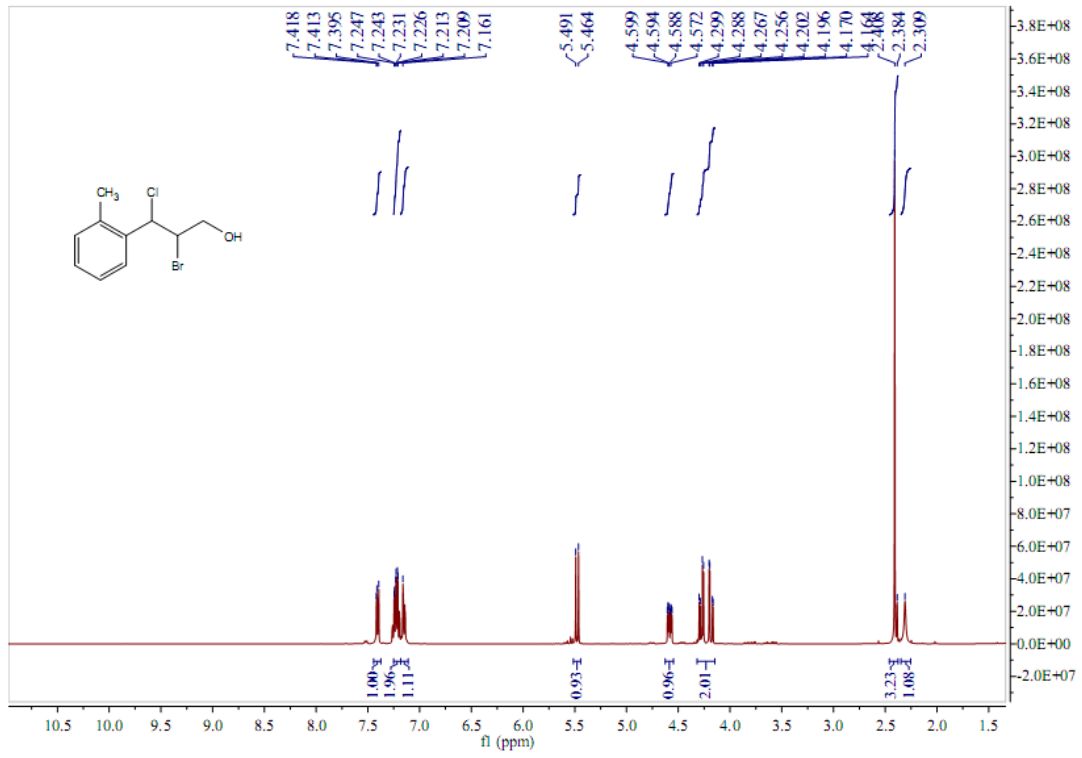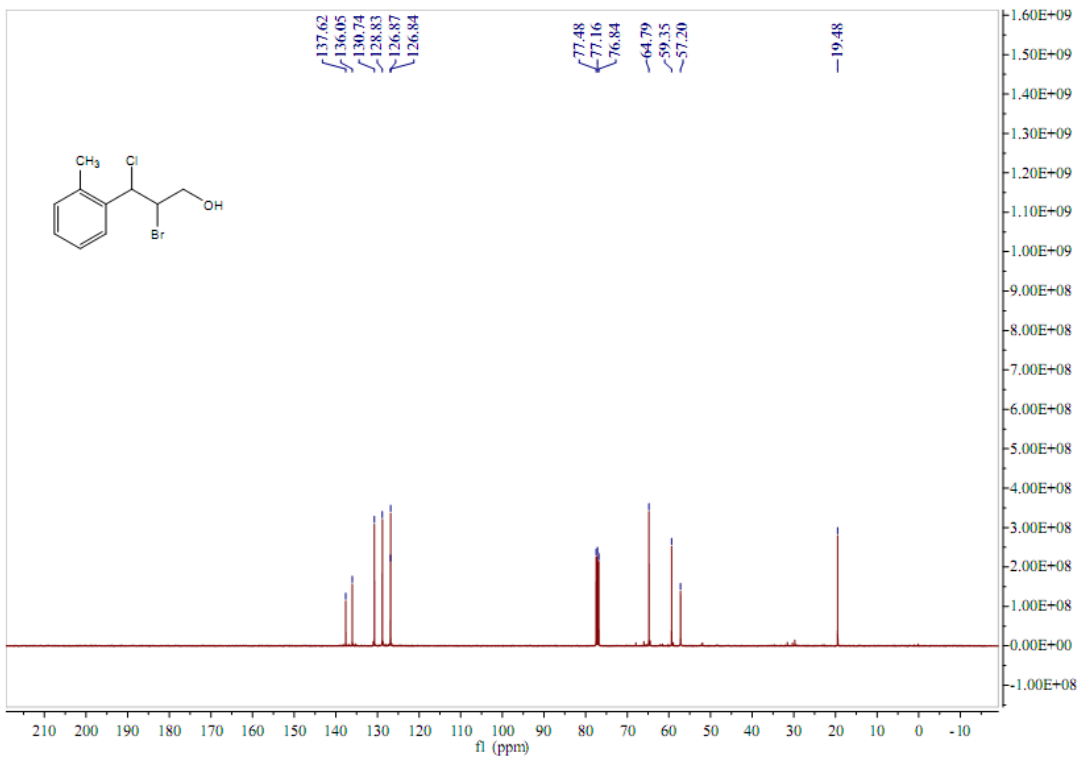

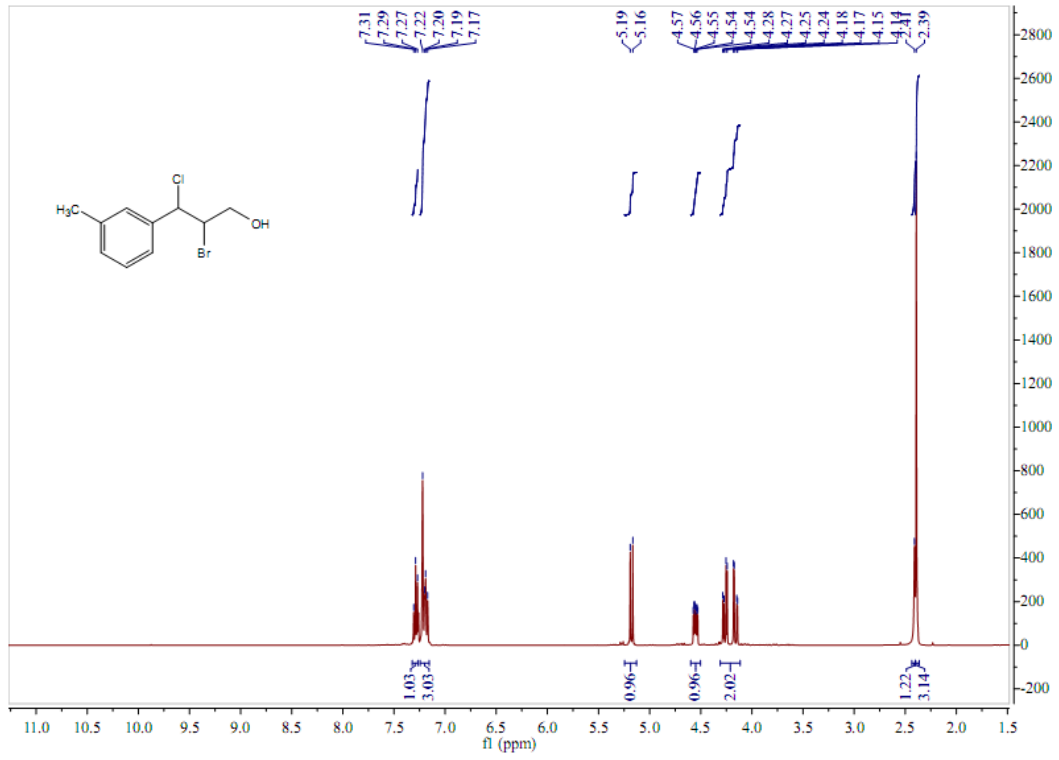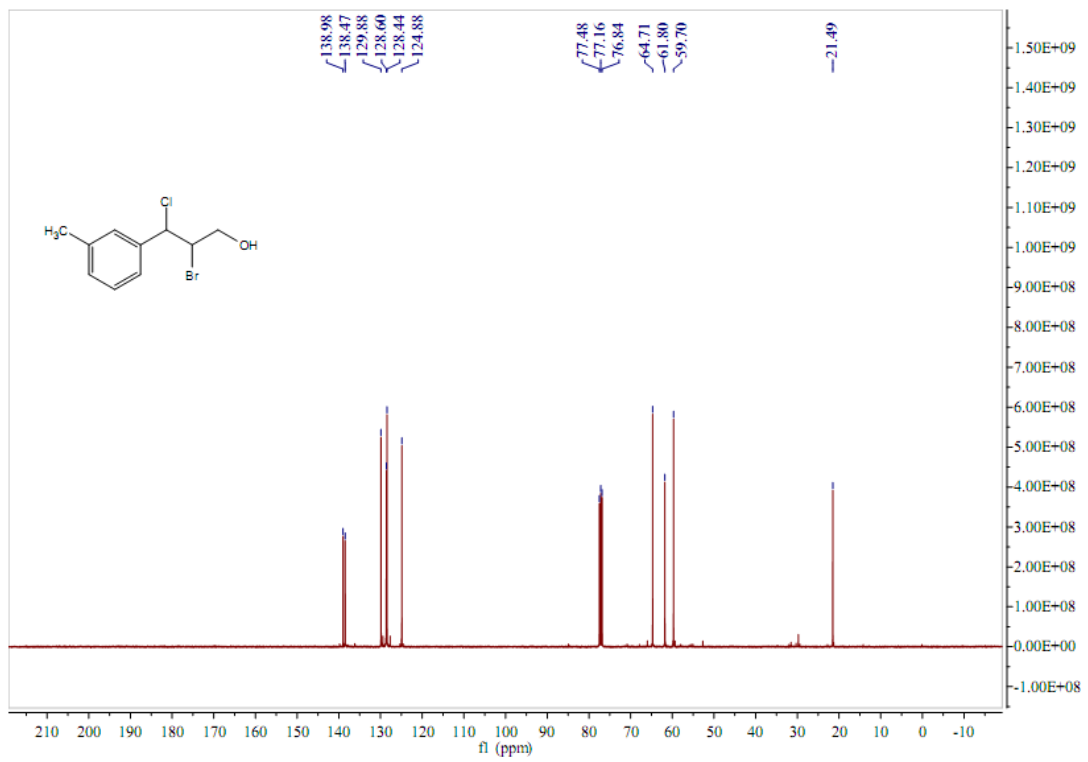



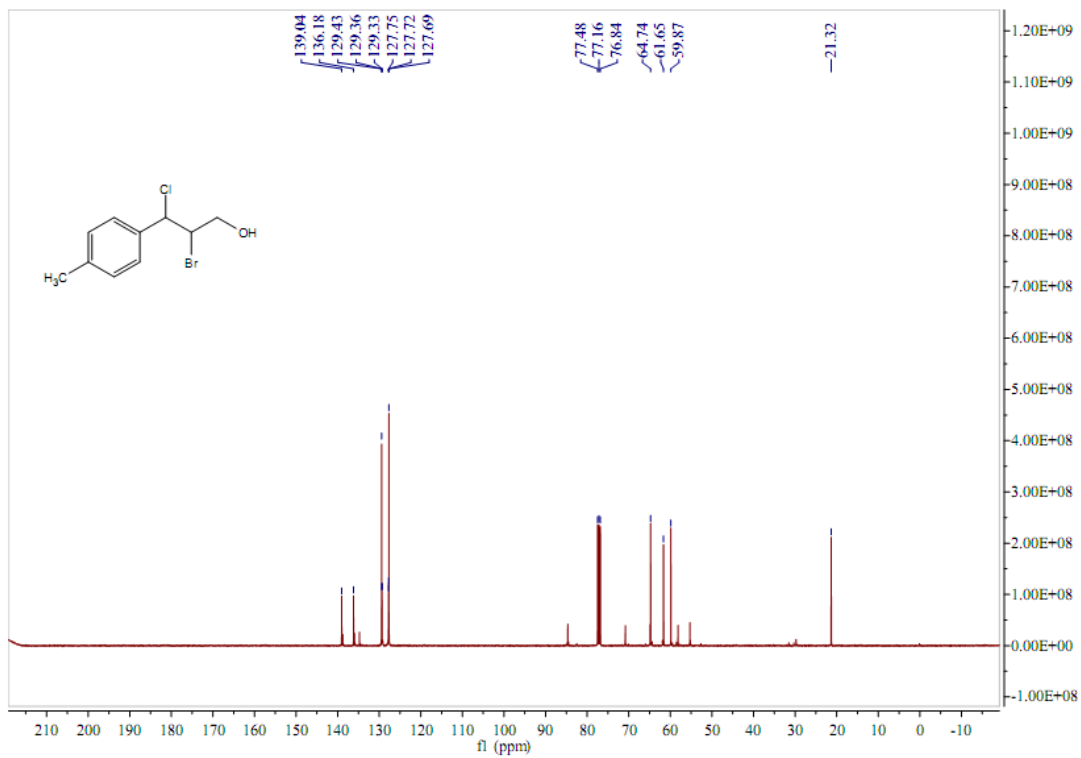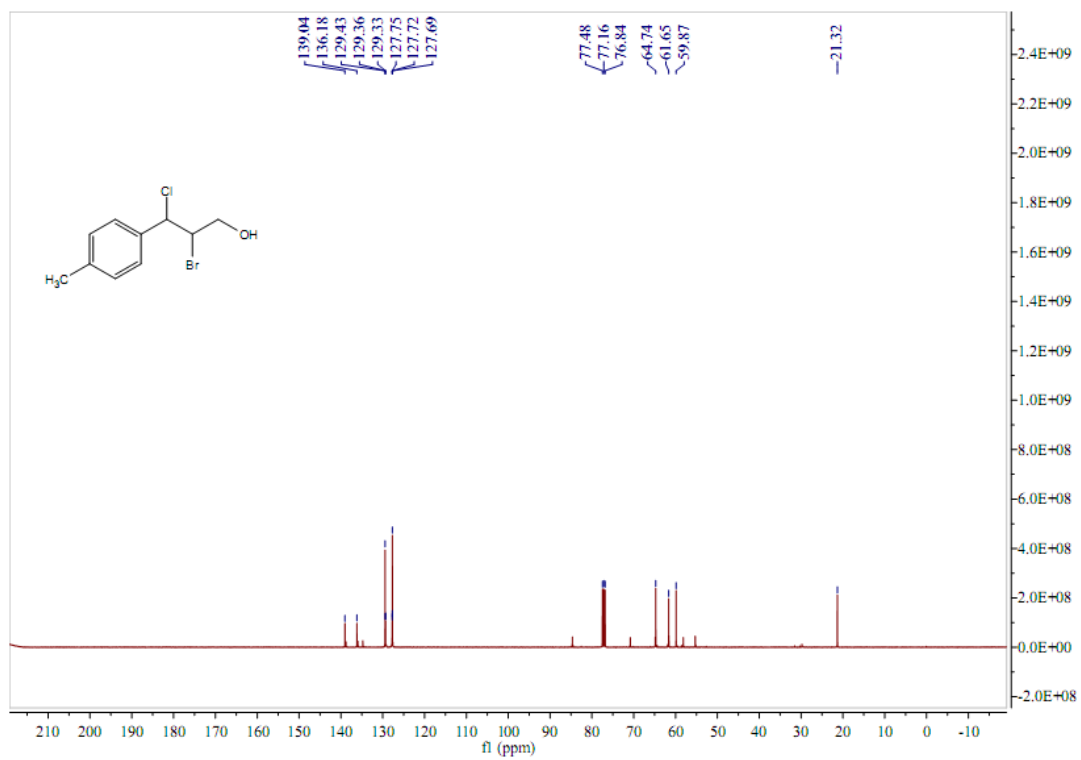

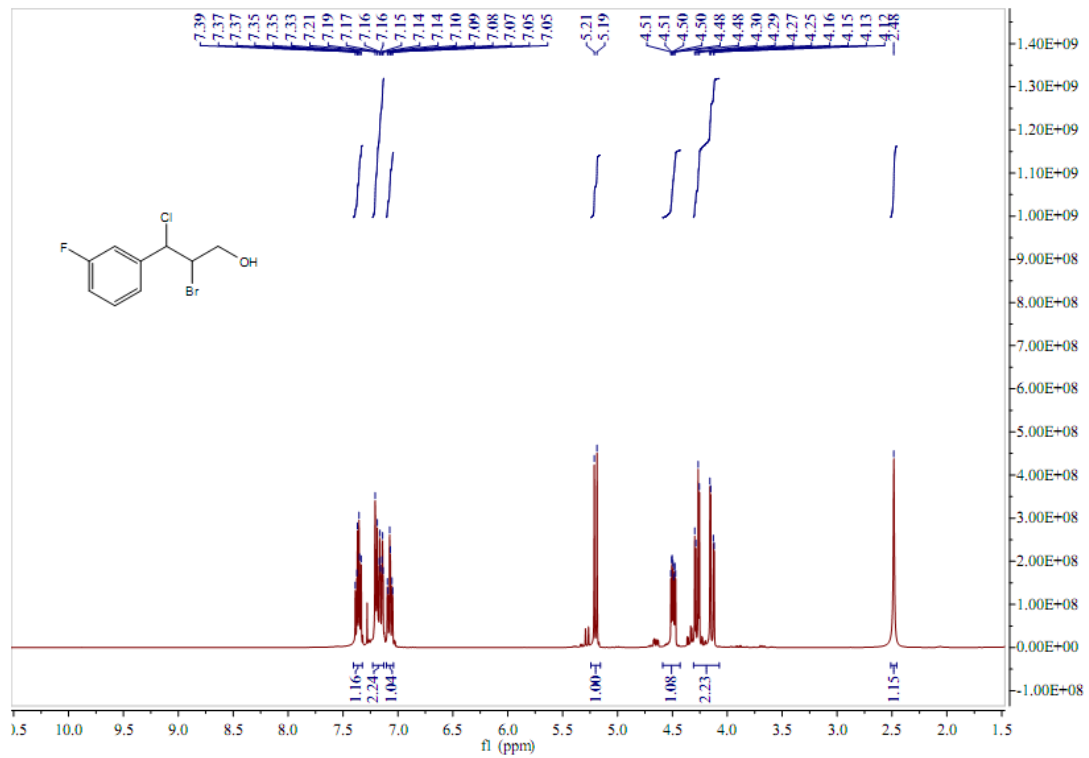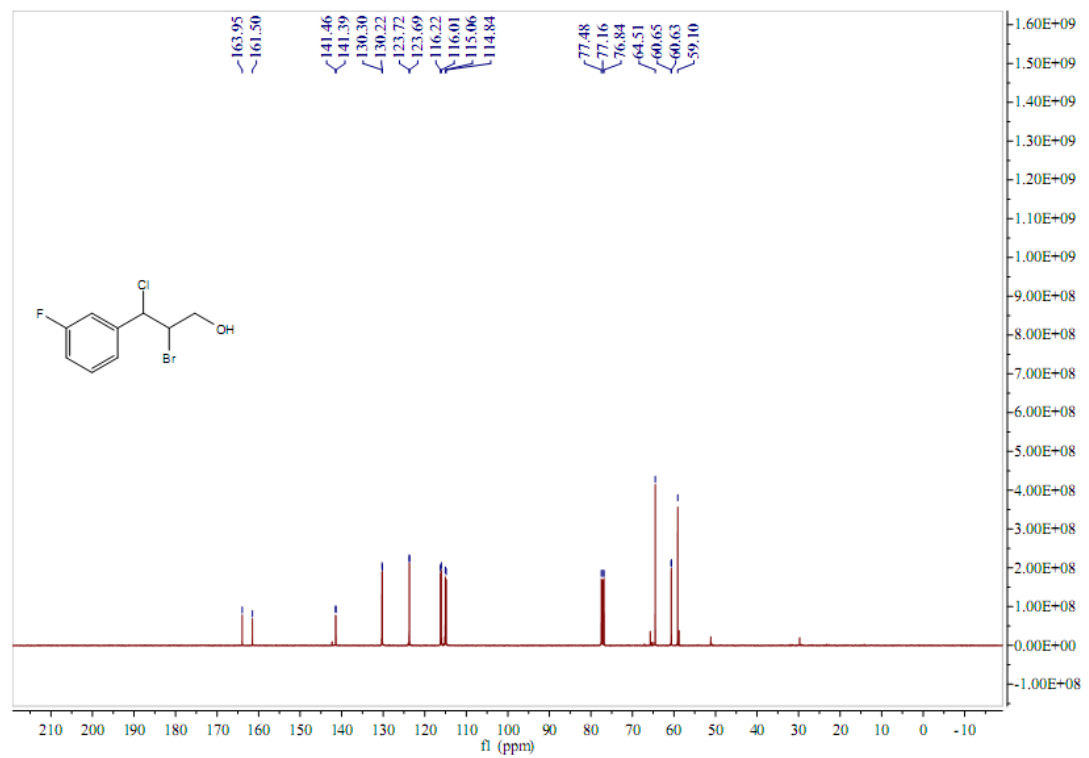

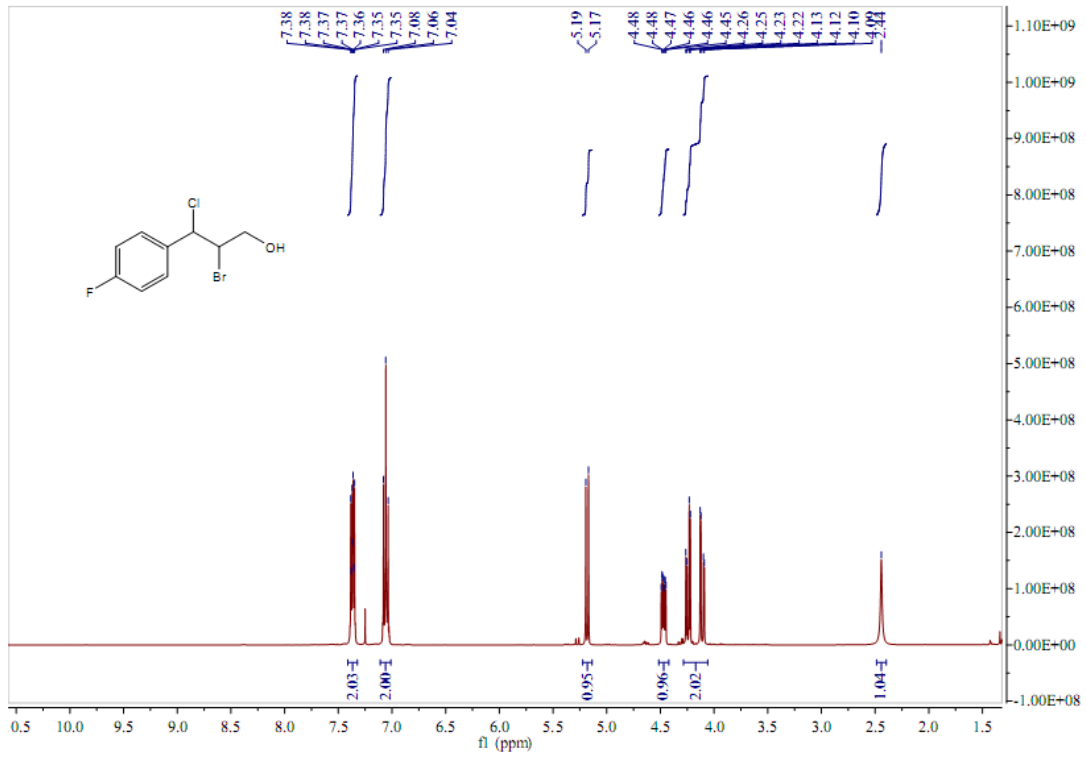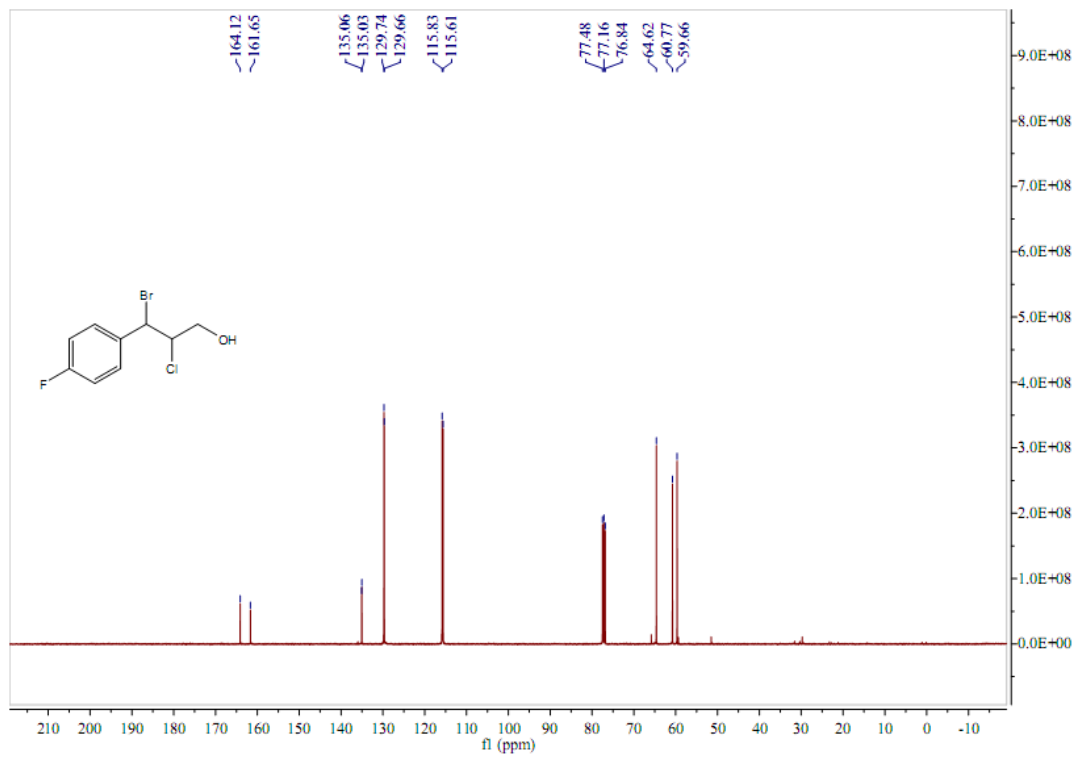

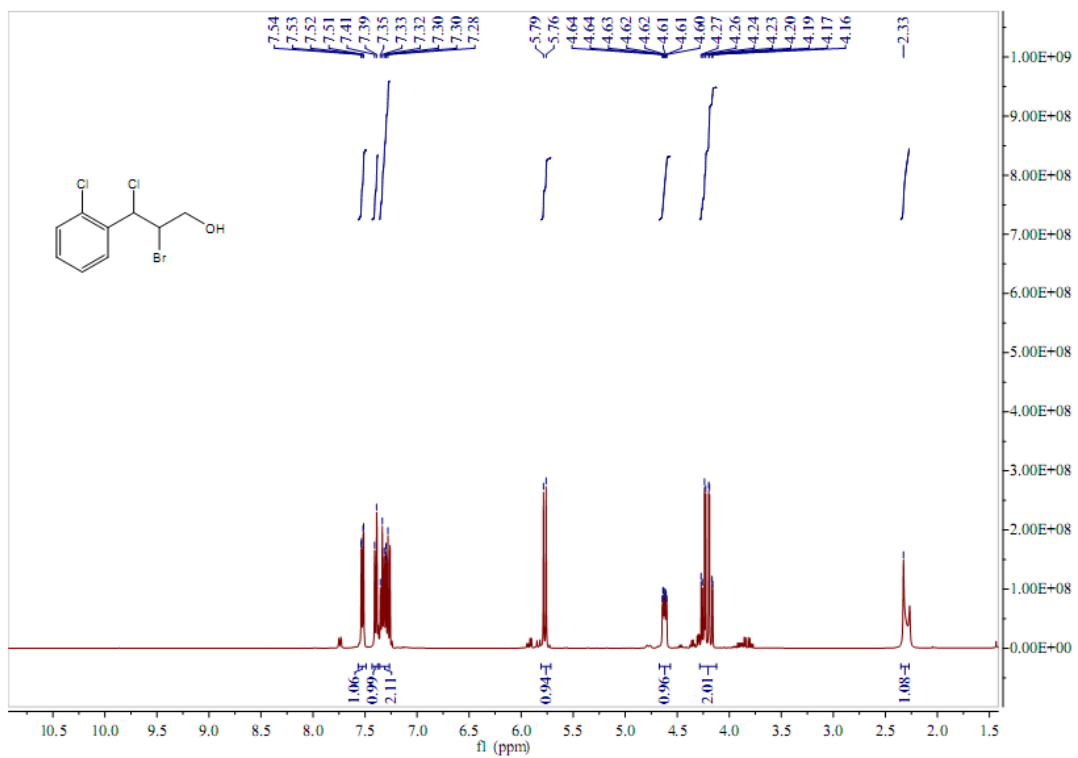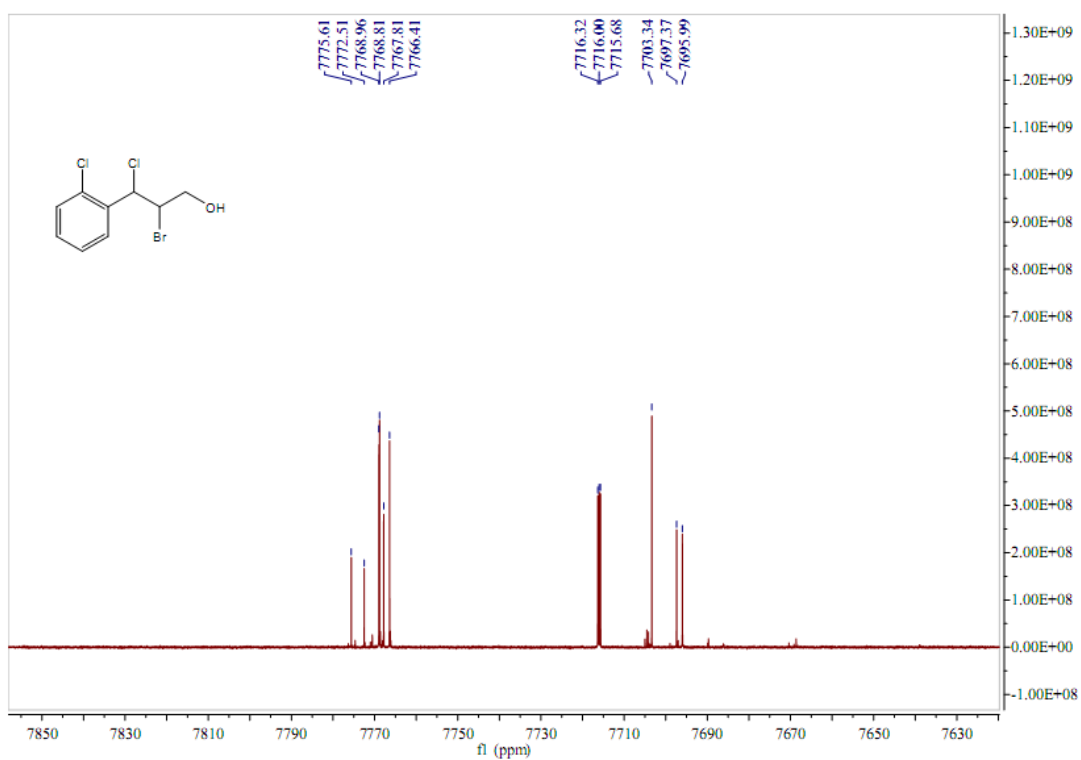

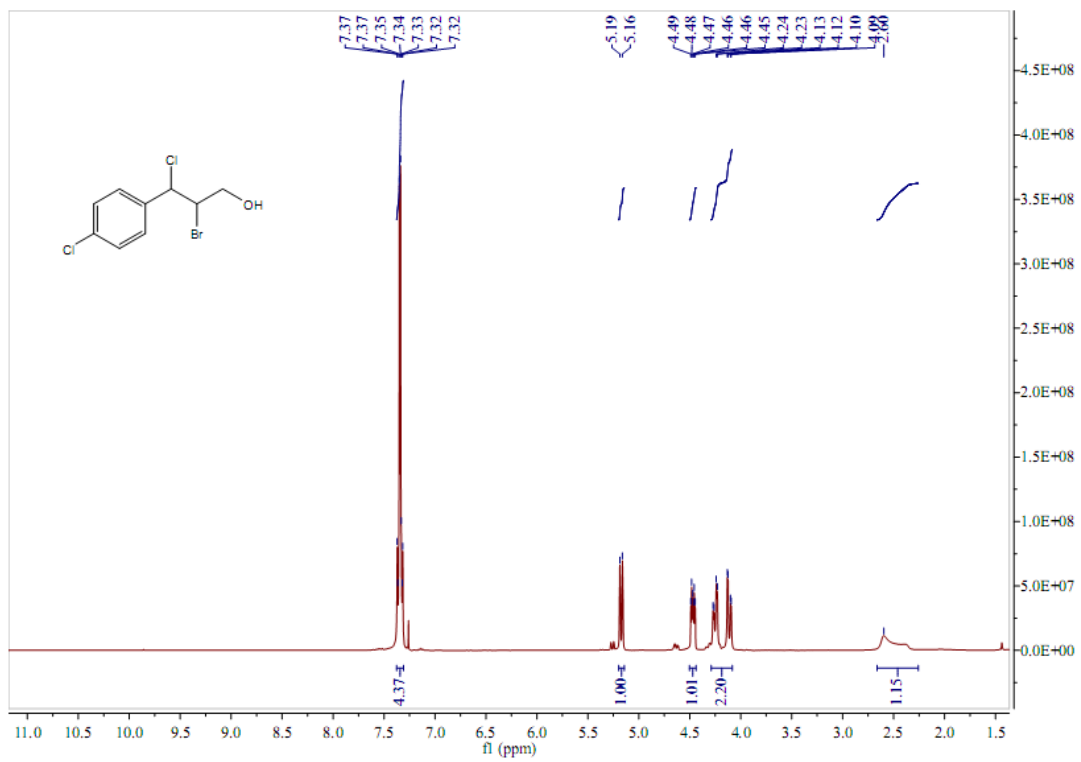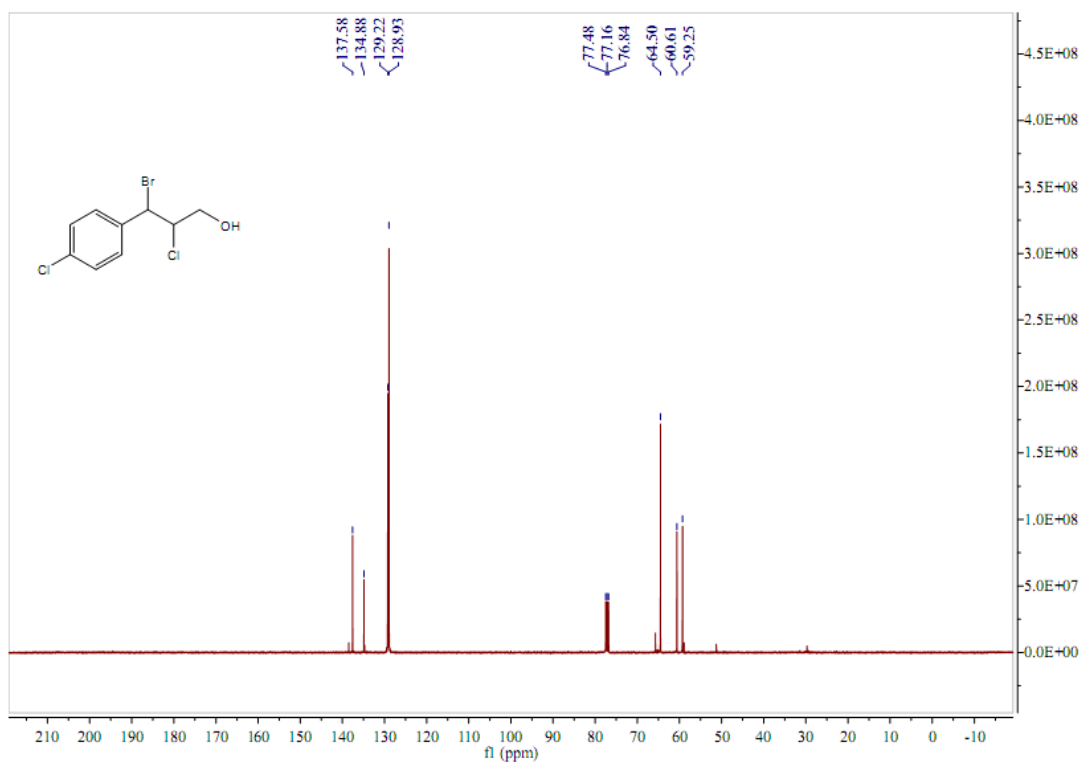

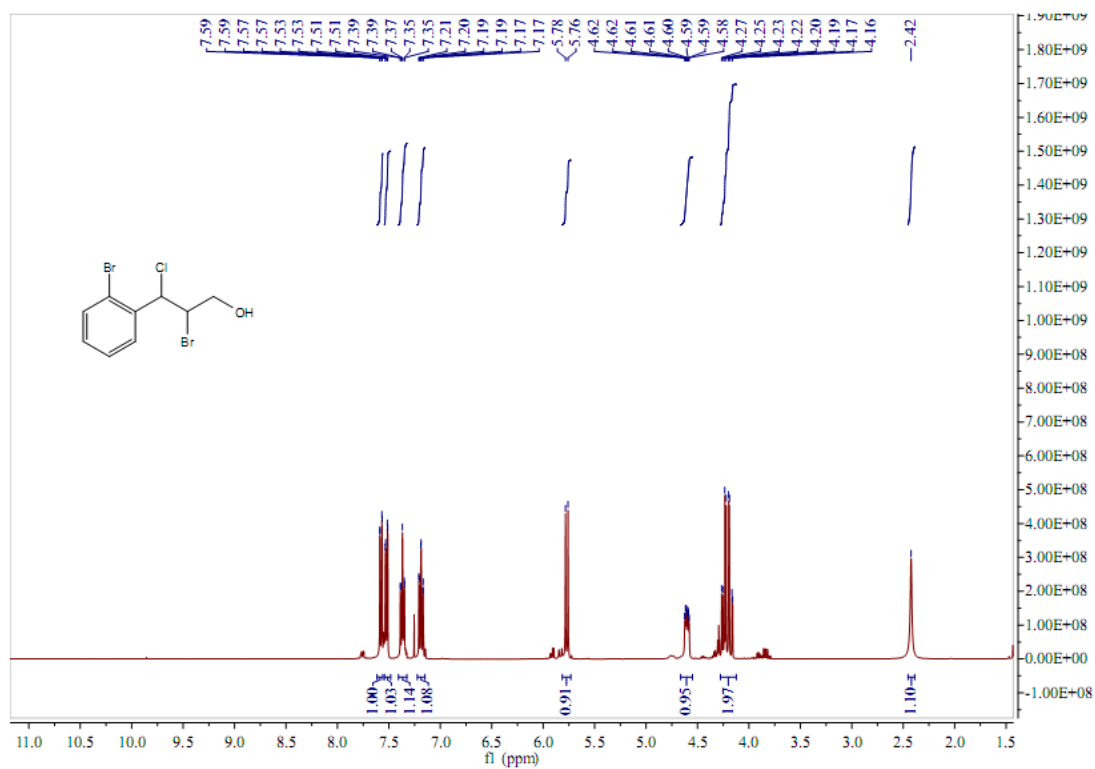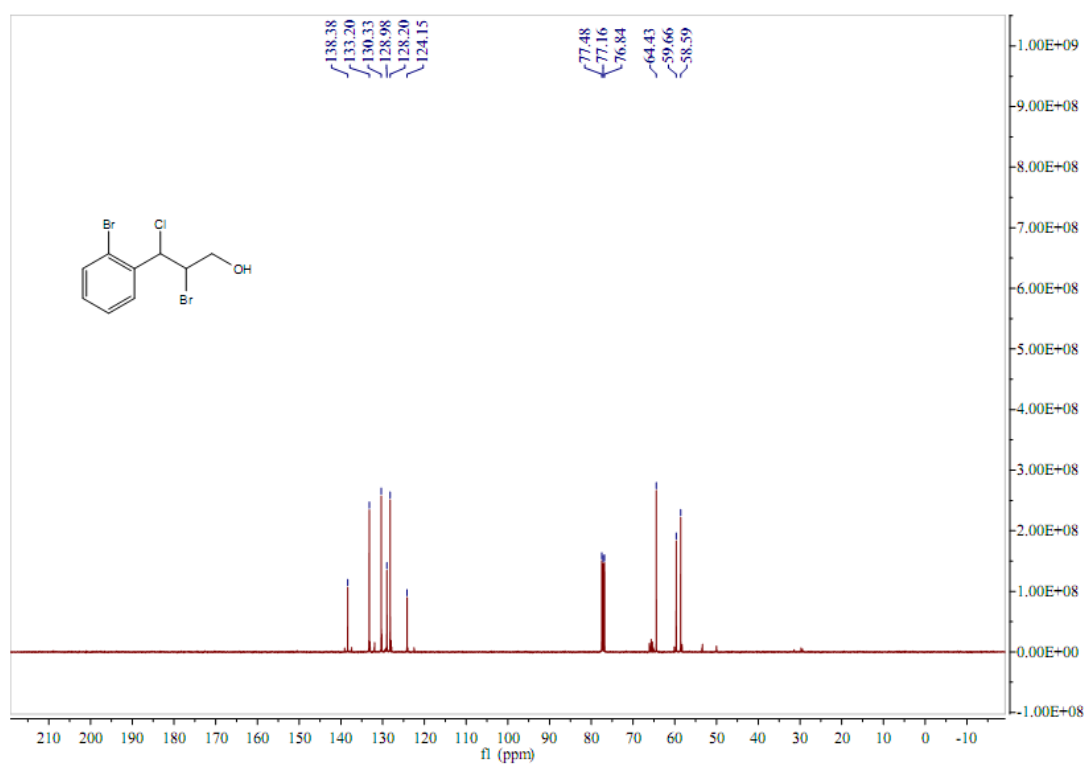

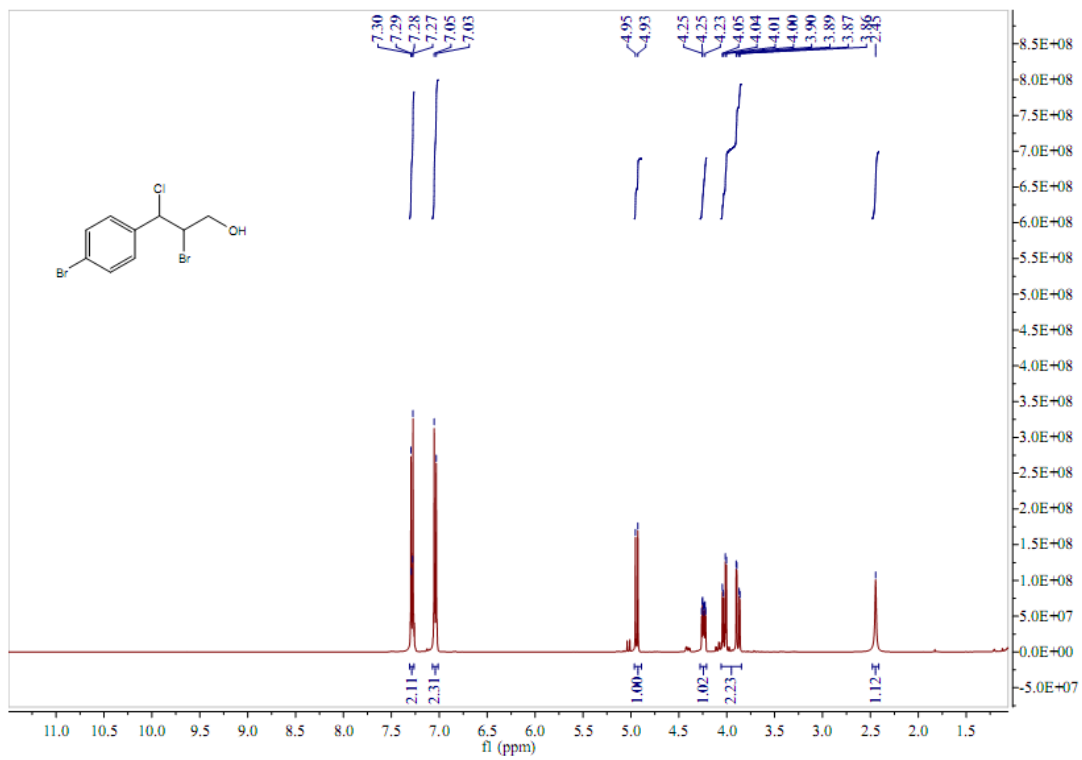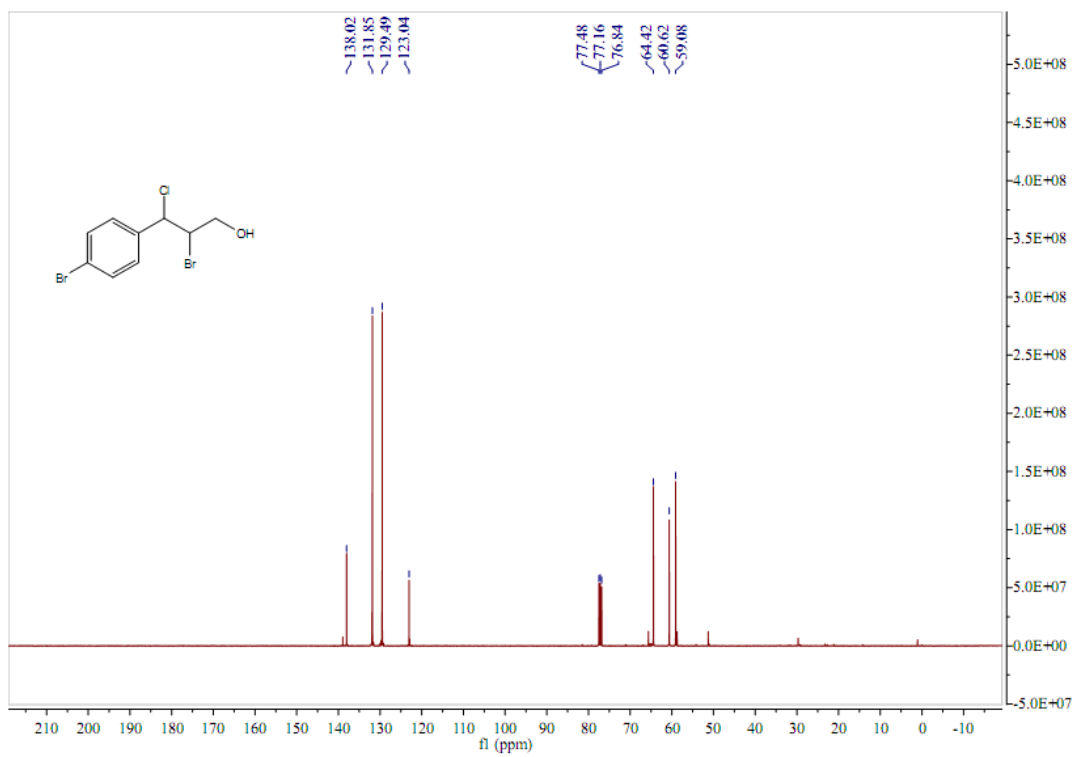

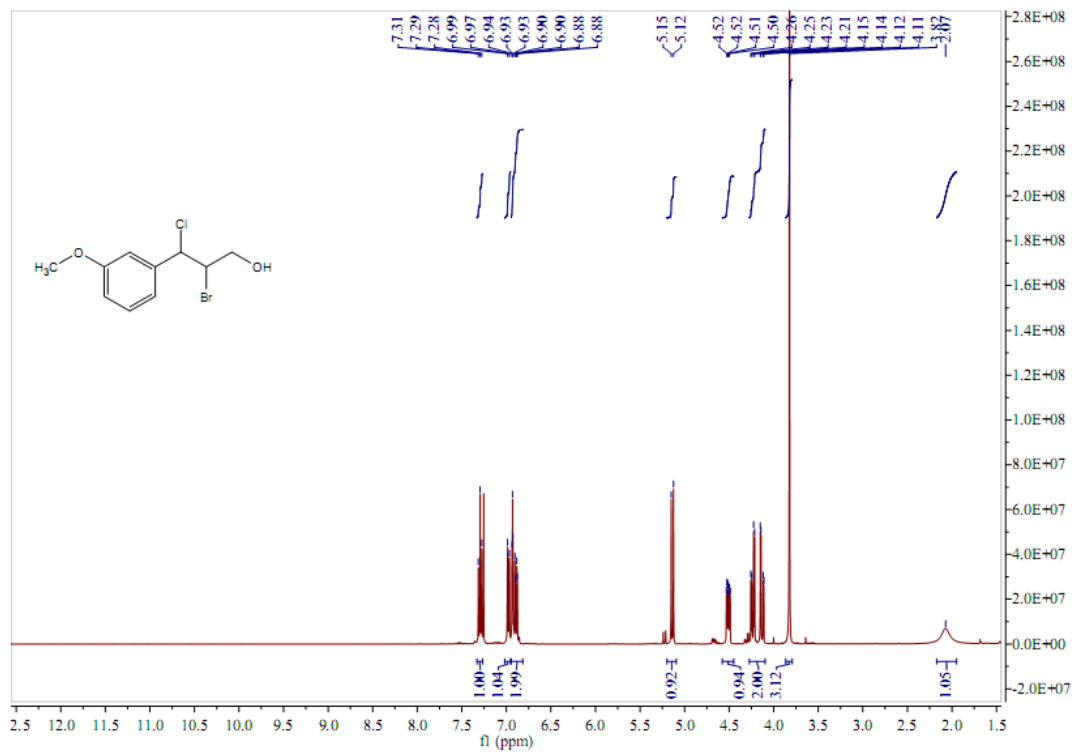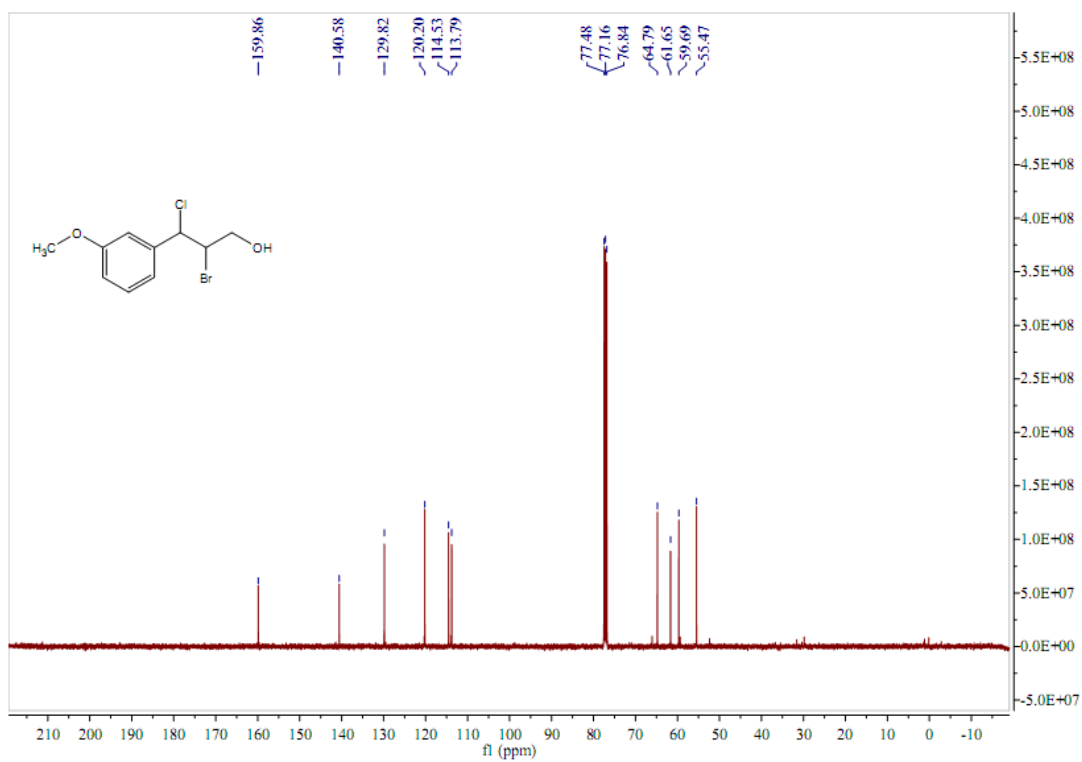



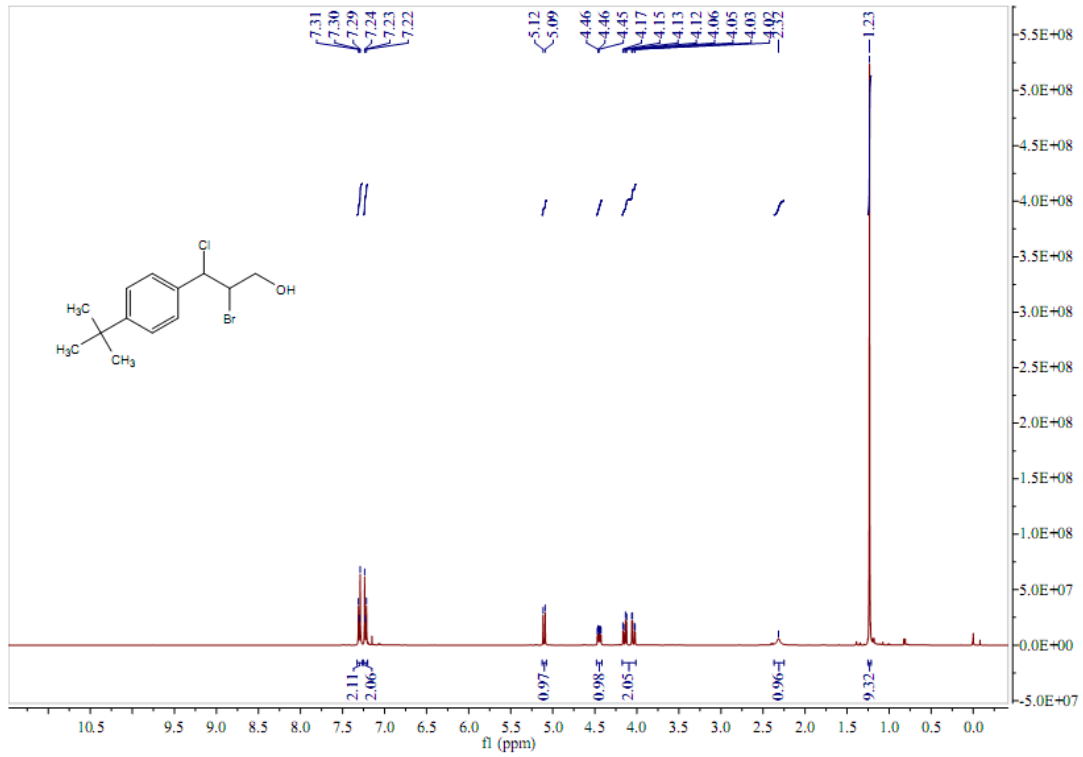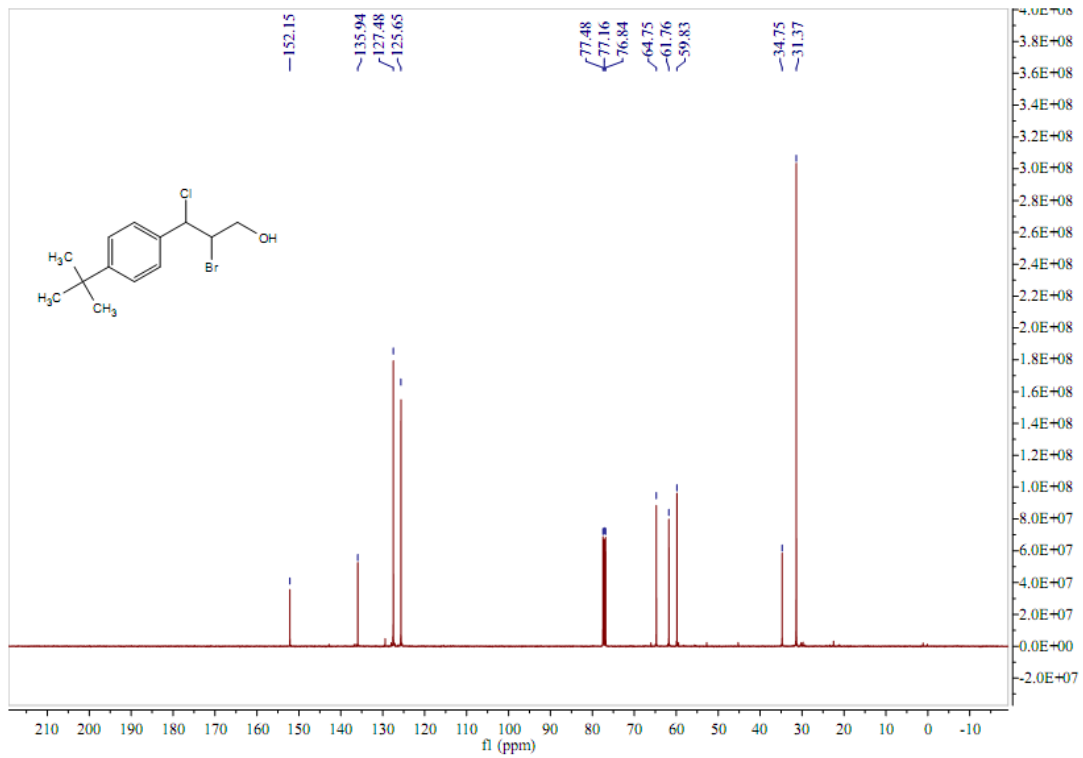

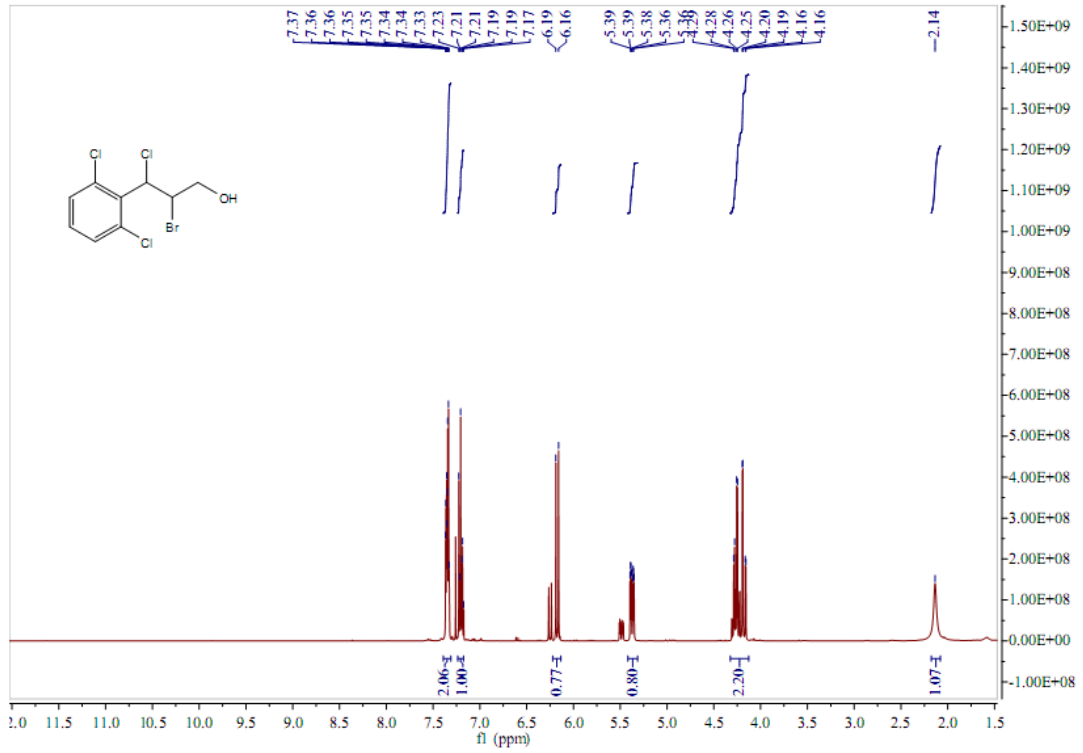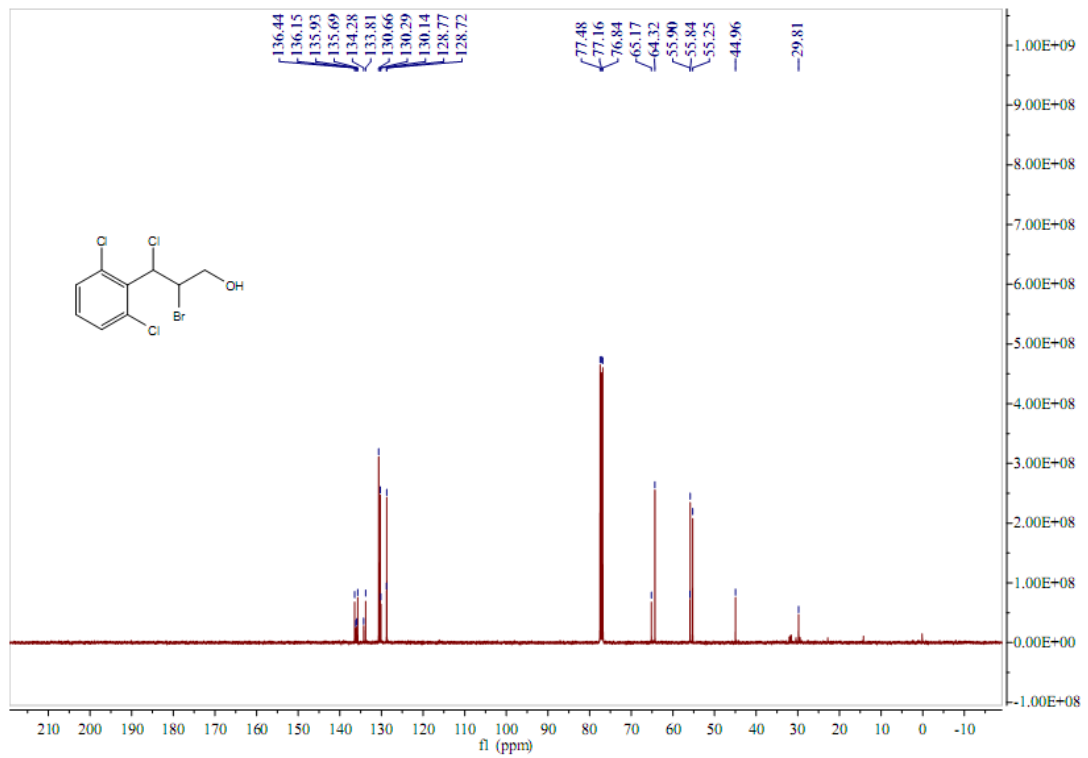

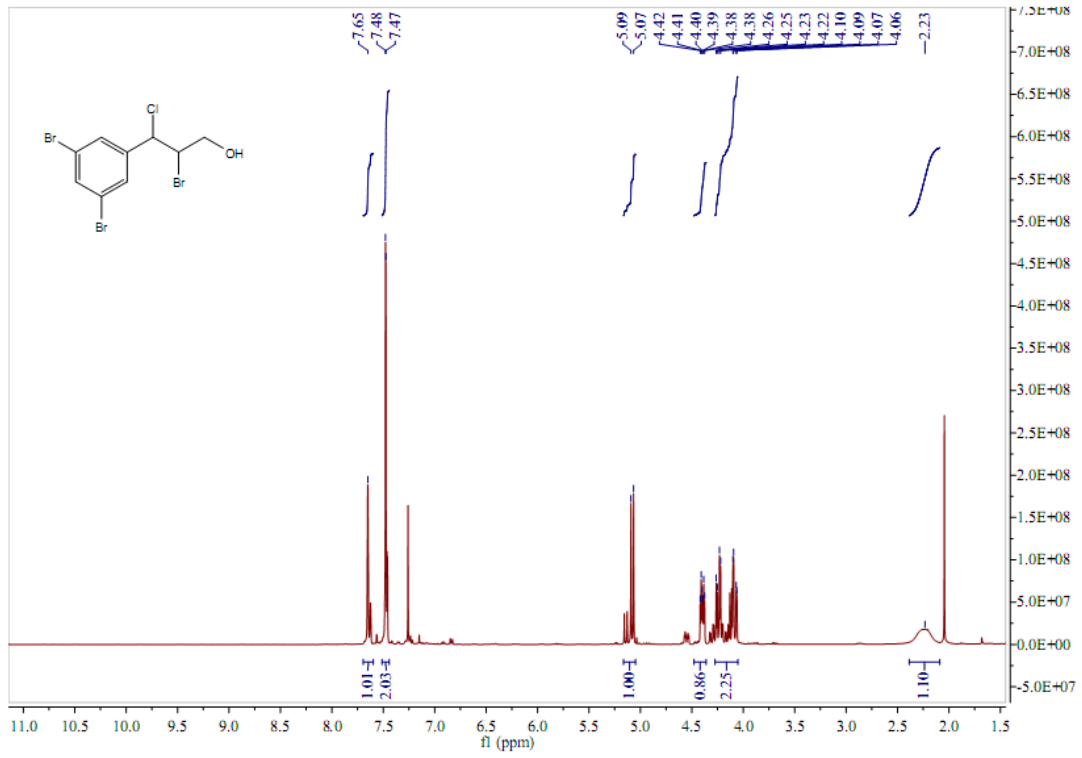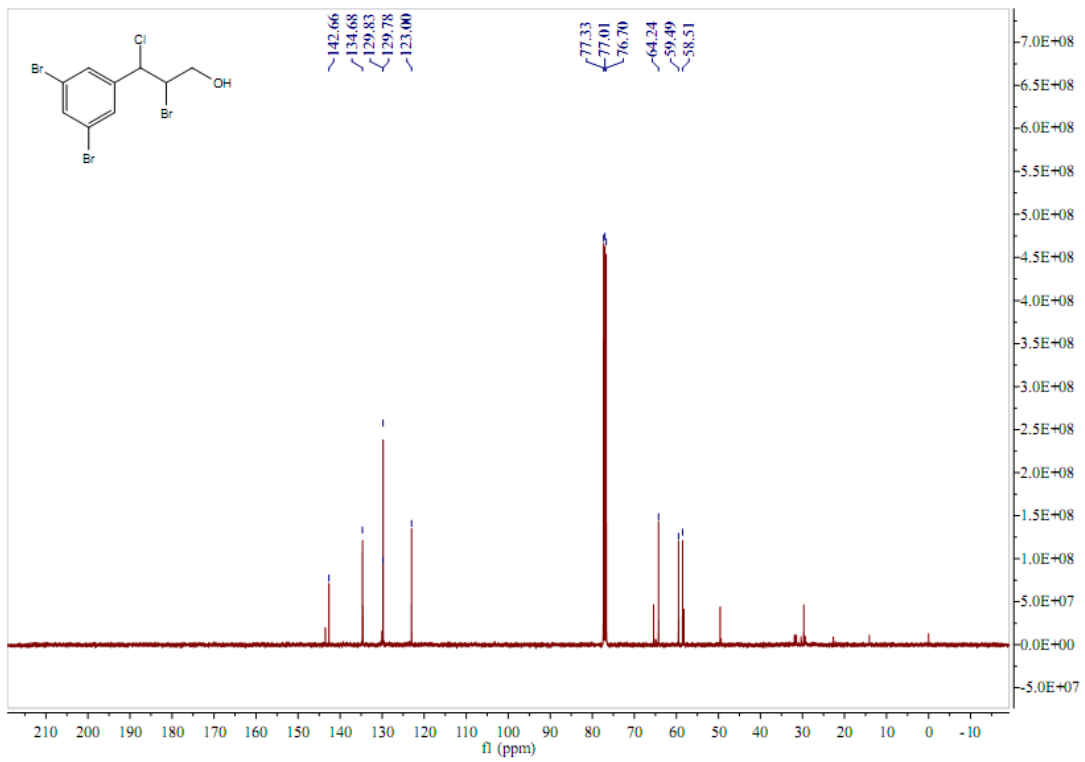

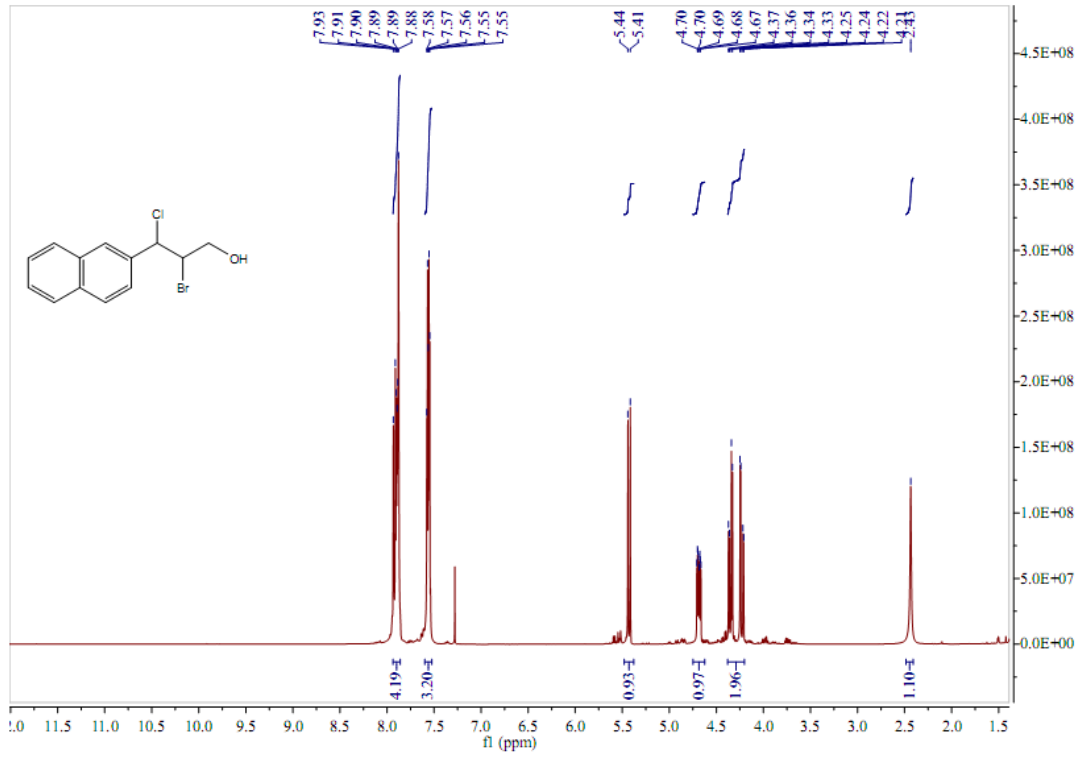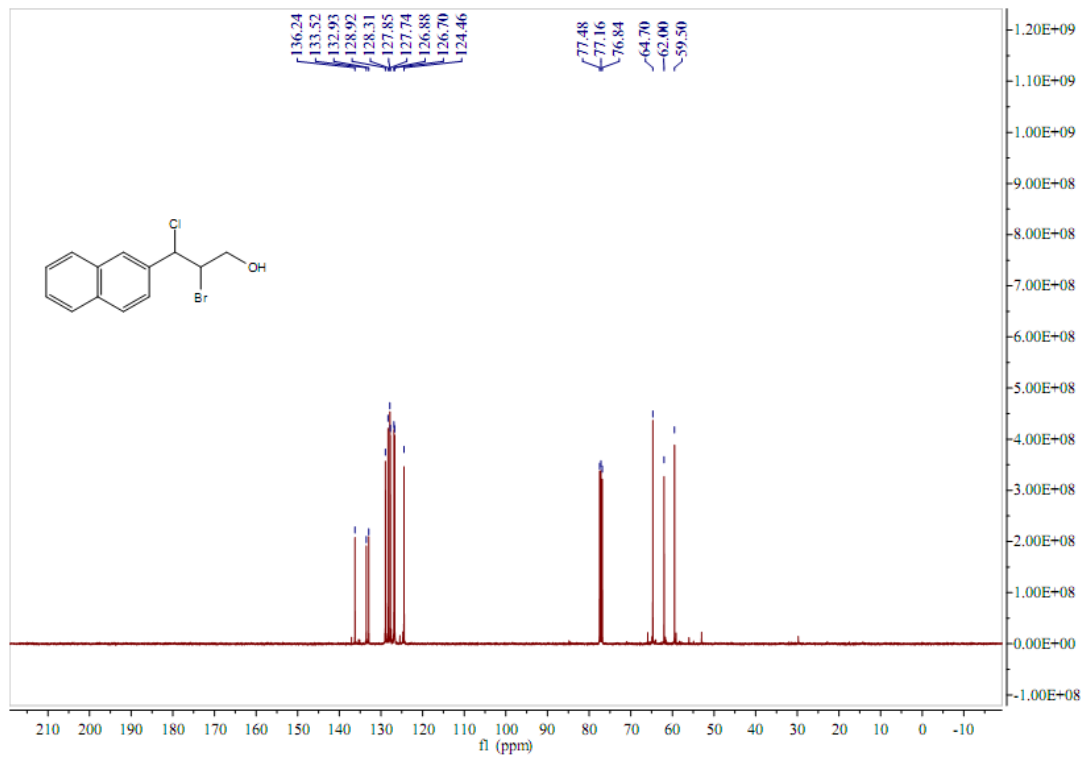

## HPLC spectra

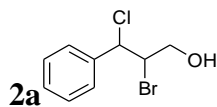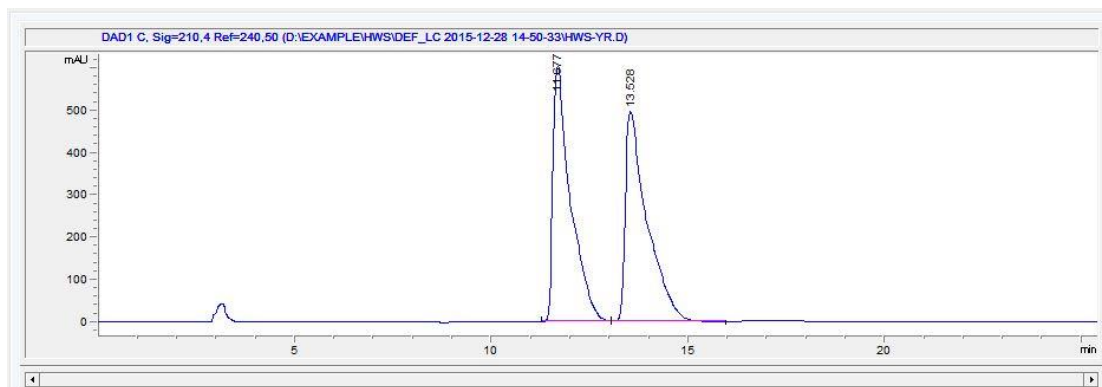

| # | 时间     | 峰面积     | 峰高    | 峰宽     | 对称因子  | 峰面积 %  |
|---|--------|---------|-------|--------|-------|--------|
| 1 | 11.677 | 18620.8 | 603.3 | 0.4361 | 0.323 | 49.507 |
| 2 | 13.528 | 18991.5 | 494.2 | 0.5423 | 0.284 | 50.493 |

| Ret Time | Area/mAU | Area/% |
|----------|----------|--------|
| 11.68    | 1322     | 49.601 |
| 13.82    | 1343.5   | 50.399 |

### method A

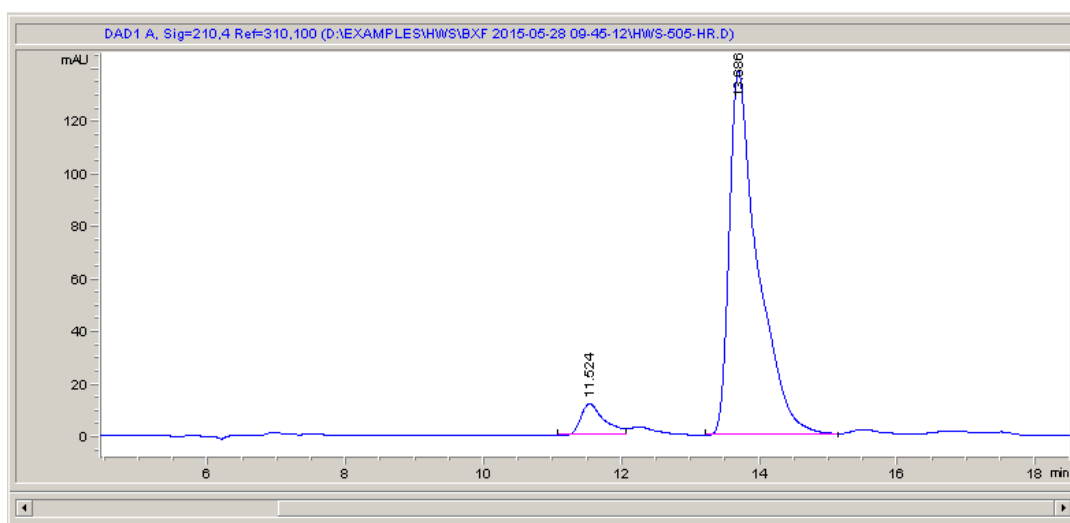

| Ret Time | Area/mAU | Area/% |
|----------|----------|--------|
| 11.52    | 286.5    | 6.704  |
| 13.68    | 3989.1   | 93.296 |

### method B

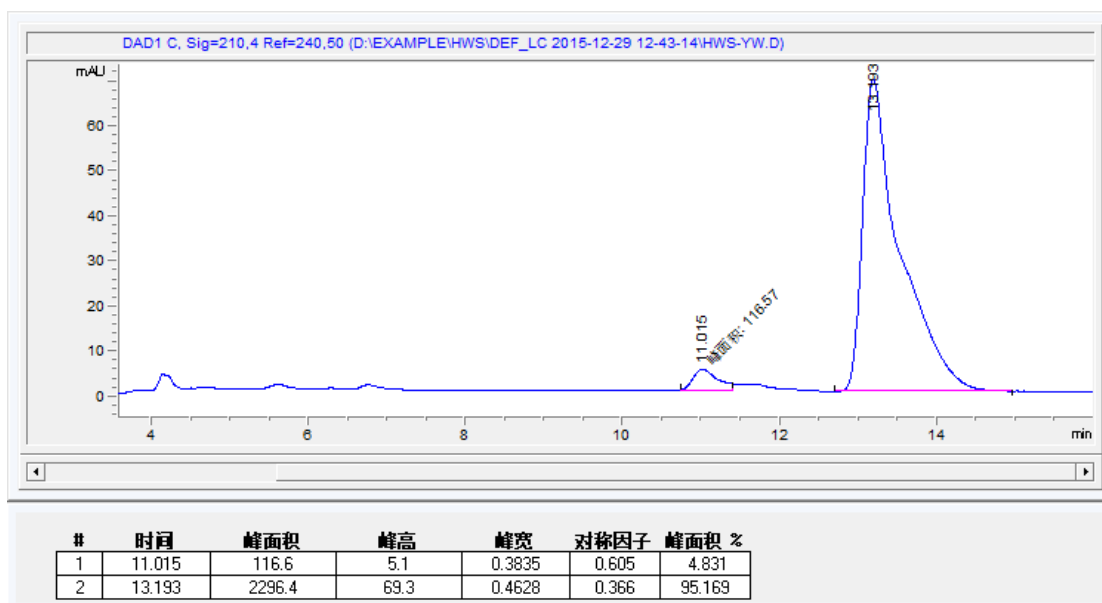

| Ret Time | Area/mAU | Area/% |
|----------|----------|--------|
| 11.01    | 116.6    | 4.831  |
| 13.19    | 2296.4   | 95.169 |

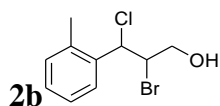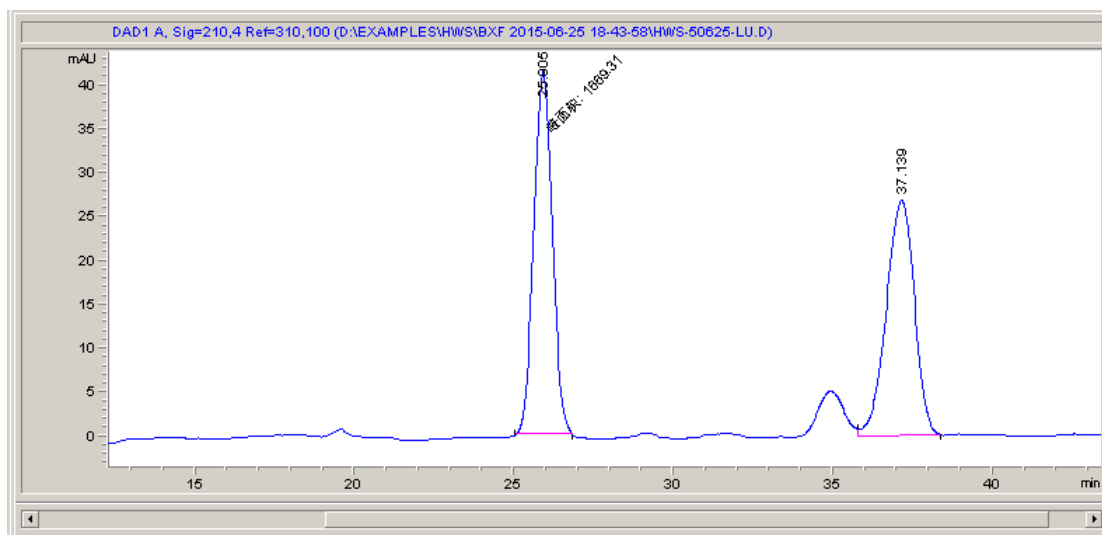

| Ret Time | Area/mAU | Area/% |
|----------|----------|--------|
| 25.91    | 1669     | 50.185 |
| 37.14    | 1657     | 49.815 |

method A

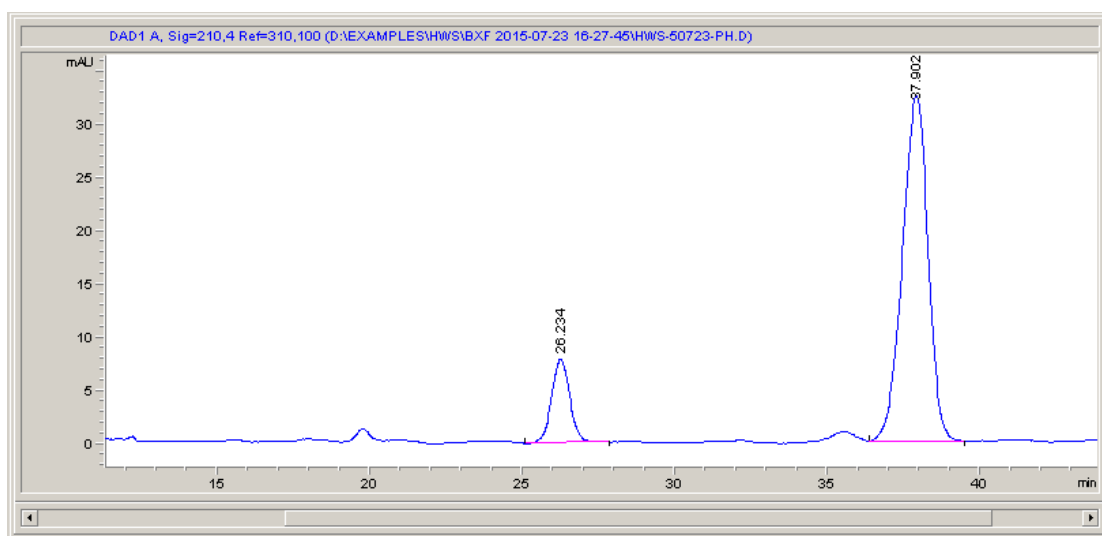

| Ret Time | Area/mAU | Area/% |
|----------|----------|--------|
| 26.23    | 355.5    | 15.047 |
| 37.90    | 1894.3   | 84.953 |

#### method B

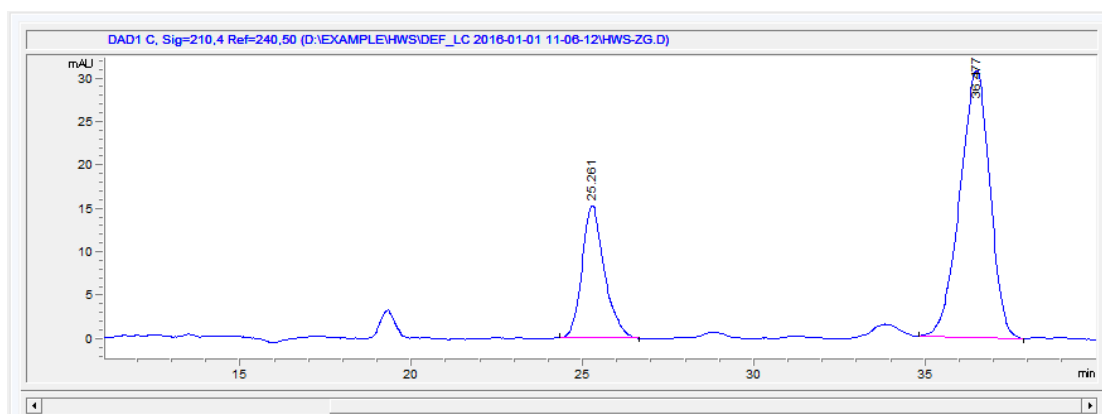

| # | 时间     | 峰面积    | 峰高   | 峰宽     | 对称因子  | 峰面积 %  |
|---|--------|--------|------|--------|-------|--------|
| 1 | 25.261 | 691.1  | 15.3 | 0.6198 | 0.793 | 26.921 |
| 2 | 36.477 | 1876.1 | 30.7 | 0.7943 | 1.203 | 73.079 |

| Ret Time | Area/mAU | Area/% |
|----------|----------|--------|
| 25.26    | 691.1    | 26.921 |
| 36.48    | 1876.1   | 73.097 |

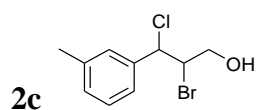

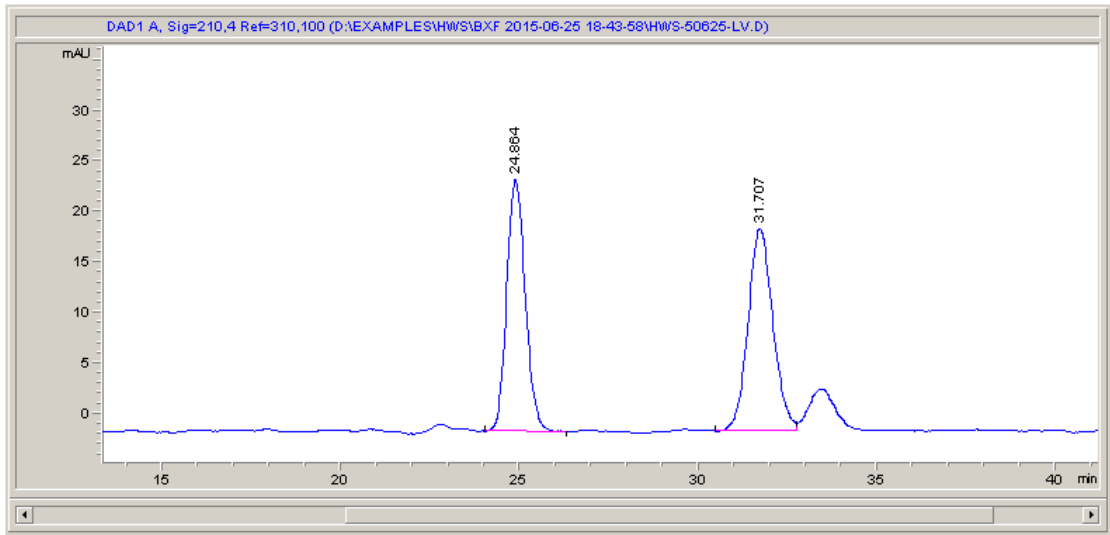

| Ret Time | Area/mAU | Area/% |
|----------|----------|--------|
| 24.86    | 931.1    | 49.173 |
| 31.711   | 962.4    | 50.082 |

**method A**

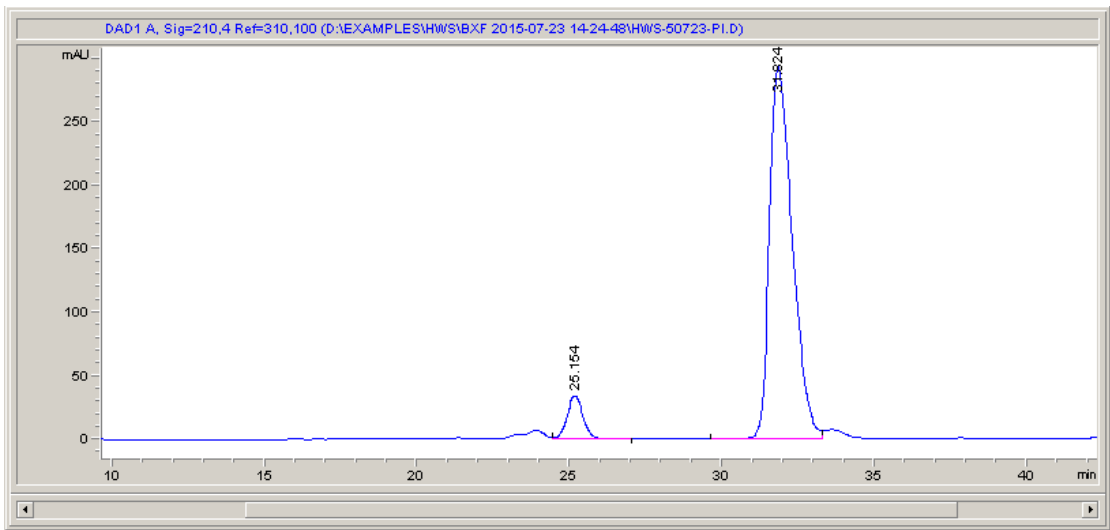

| Ret Time | Area/mAU | Area/% |
|----------|----------|--------|
| 25.15    | 1212.7   | 7.351  |
| 31.82    | 15285    | 92.649 |

**method B**



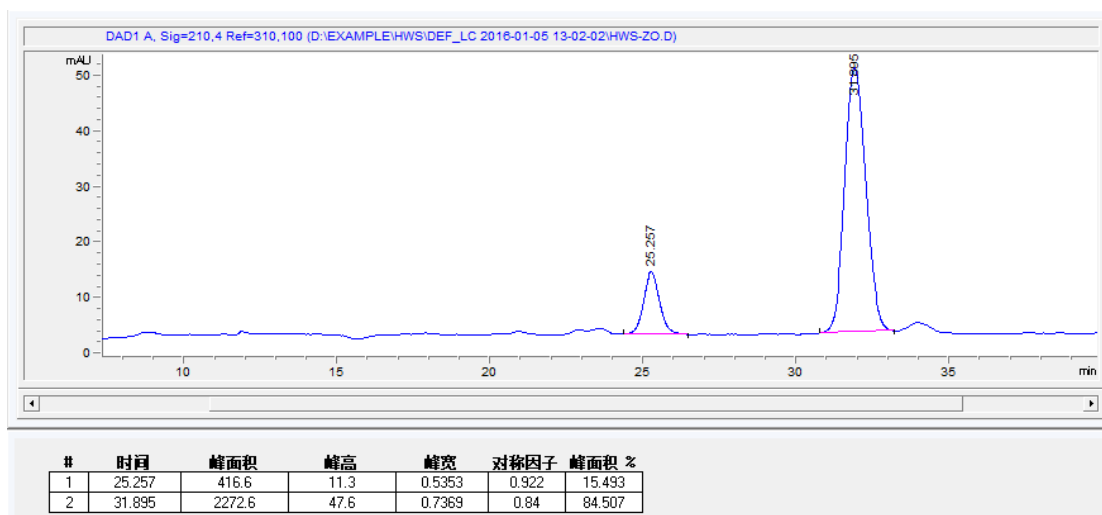

| Ret Time | Area/mAU | Area/% |
|----------|----------|--------|
| 25.25    | 416.6    | 15.49  |
| 31.89    | 2272.6   | 84.50  |

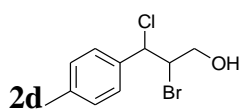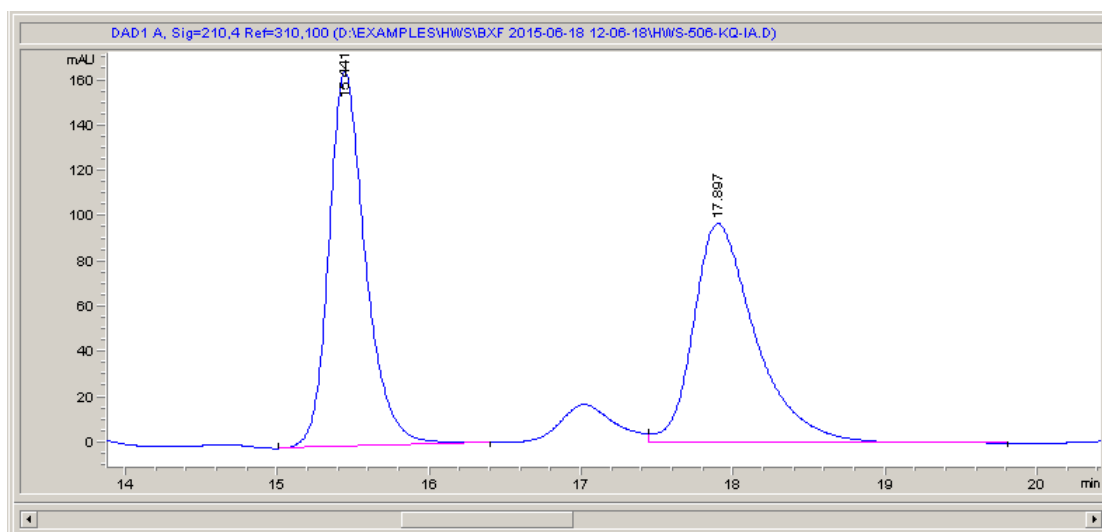

| Ret Time | Area/mAU | Area/% |
|----------|----------|--------|
| 15.44    | 2658.2   | 50.01  |
| 17.89    | 2656.5   | 49.99  |

method A

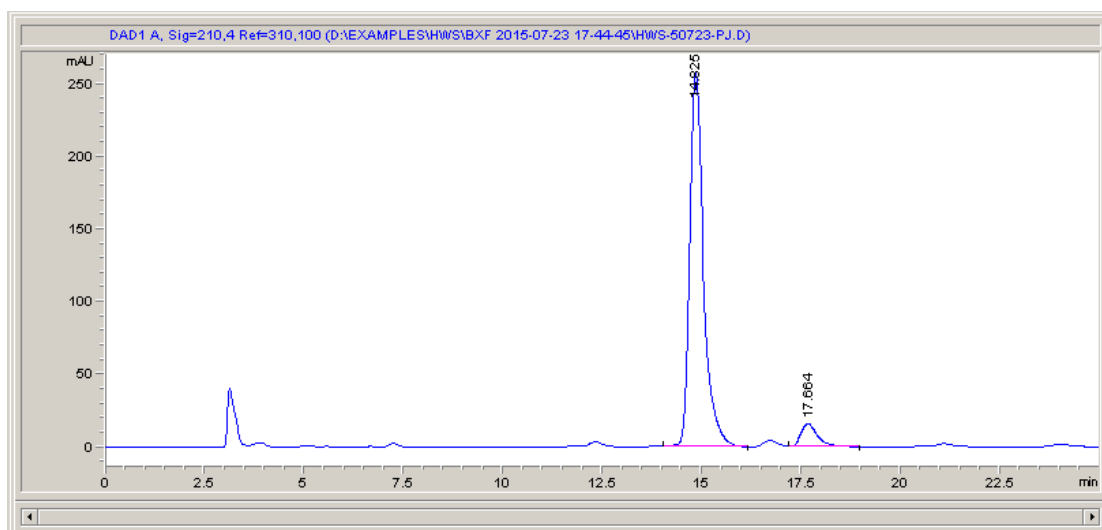

| Ret Time | Area/mAU | Area/% |
|----------|----------|--------|
| 14.825   | 6343.8   | 93.077 |
| 17.664   | 471.9    | 6.923  |

**method B**

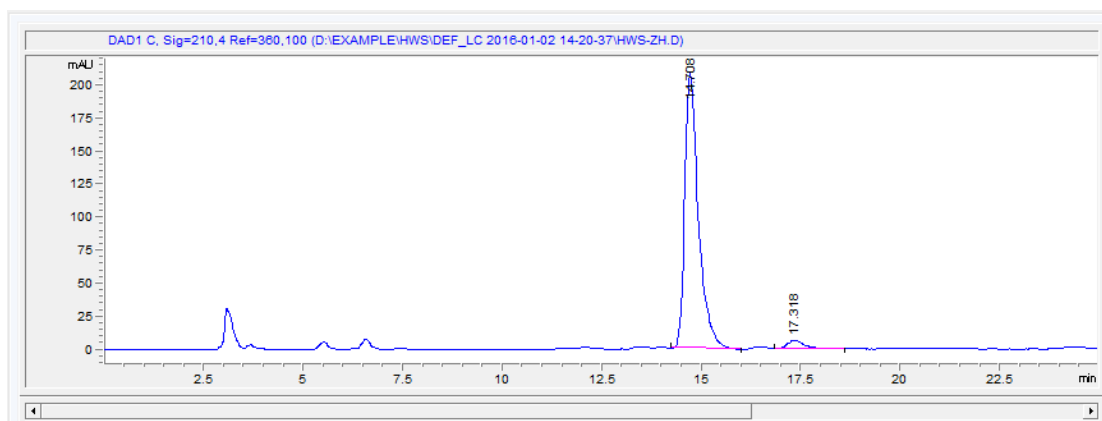

| # | 时间     | 峰面积    | 峰高    | 峰宽     | 对称因子  | 峰面积 %  |
|---|--------|--------|-------|--------|-------|--------|
| 1 | 14.708 | 4947.8 | 209.1 | 0.352  | 0.588 | 96.415 |
| 2 | 17.318 | 184    | 6.4   | 0.4107 | 0.661 | 3.585  |

| Ret Time | Area/mAU | Area/% |
|----------|----------|--------|
| 14.708   | 4947.8   | 96.415 |
| 17.318   | 184      | 3.585  |

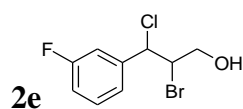

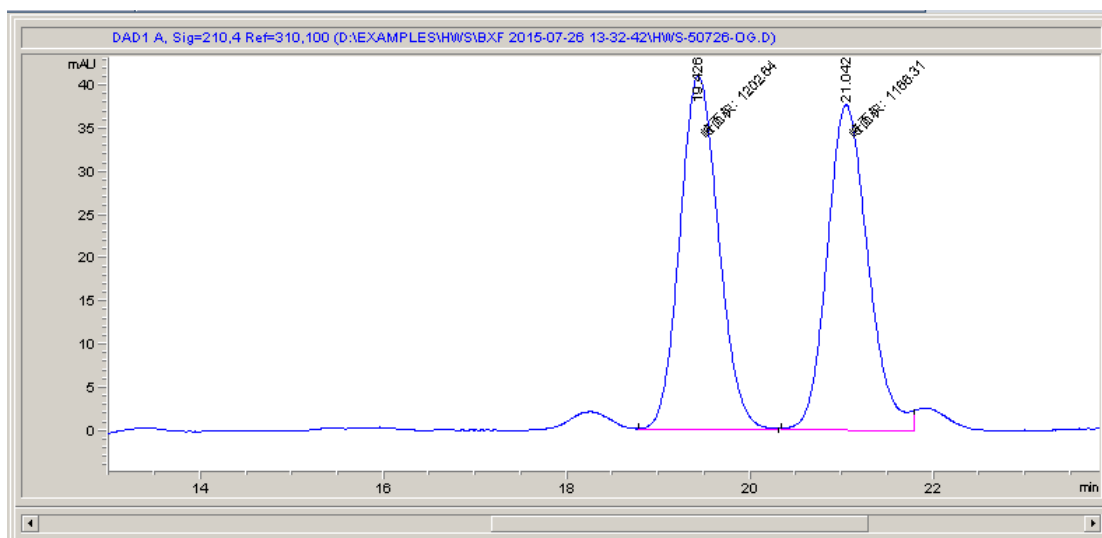

| Ret Time | Area/mAU | Area/% |
|----------|----------|--------|
| 19.43    | 1200     | 50.82  |
| 21.04    | 1161     | 49.17  |

**method A**

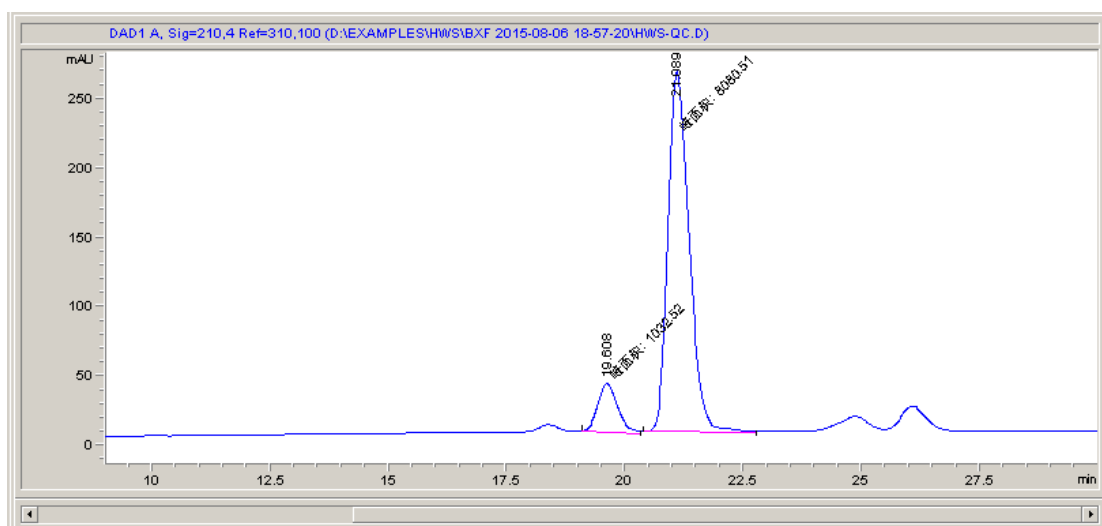

| Ret Time | Area/mAU | Area/% |
|----------|----------|--------|
| 19.608   | 1012.6   | 10.844 |
| 21.089   | 8325.5   | 89.156 |

**method B**

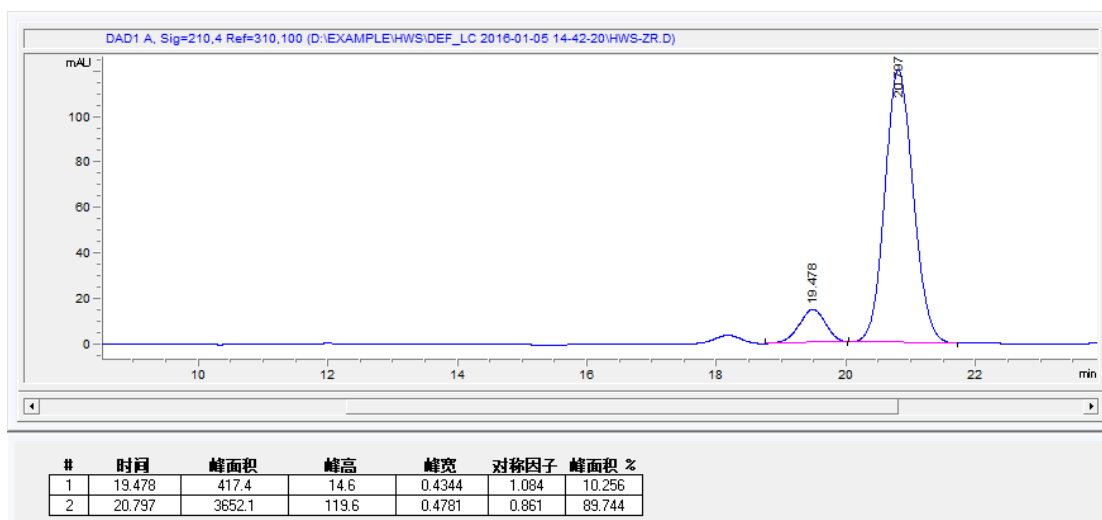

| Ret Time | Area/mAU | Area/% |
|----------|----------|--------|
| 19.478   | 417.4    | 10.256 |
| 20.797   | 3652.1   | 89.744 |

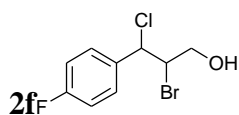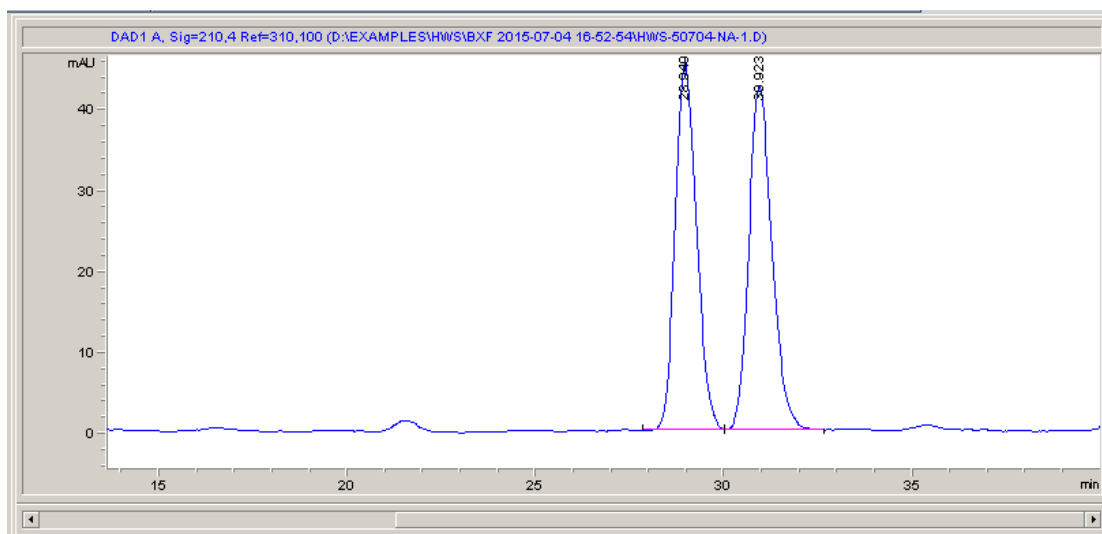

| Ret Time | Area/mAU | Area/% |
|----------|----------|--------|
| 28.95    | 1790     | 49.638 |
| 30.923   | 1816     | 50.362 |

method A

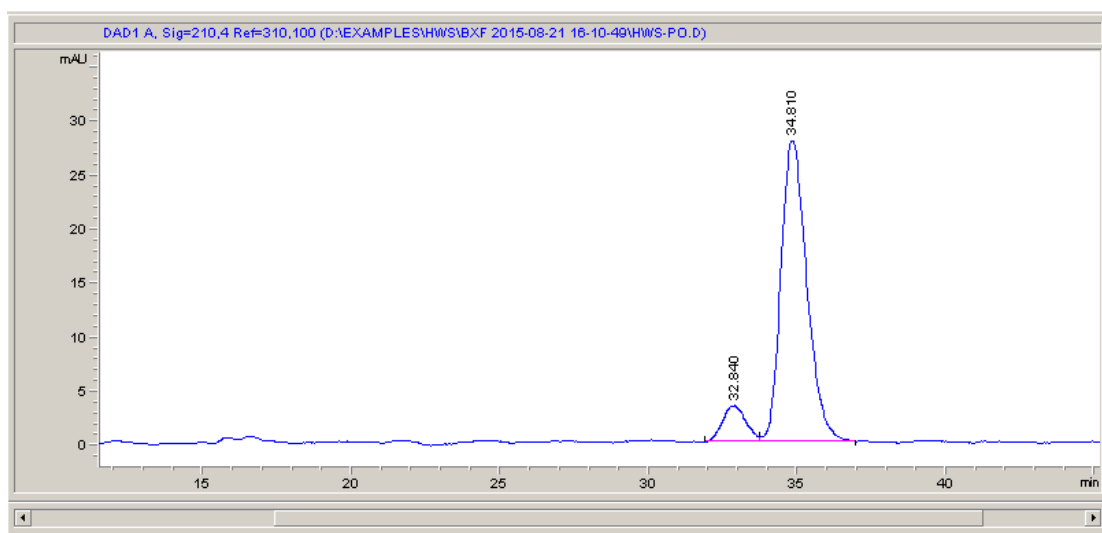

| Ret Time | Area/mAU | Area/% |
|----------|----------|--------|
| 32.84    | 184.1    | 9.82   |
| 34.81    | 1690.5   | 90.18  |

**method B**

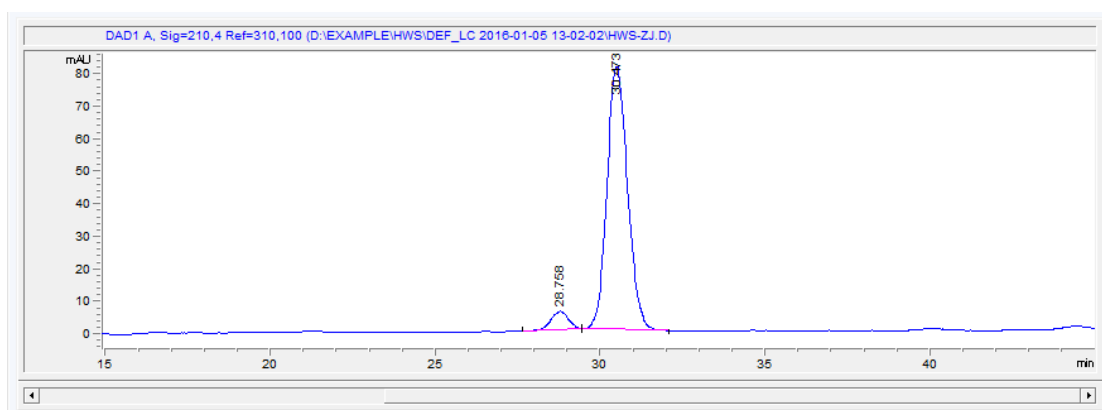

| # | 时间     | 峰面积    | 峰高  | 峰宽     | 对称因子  | 峰面积 %  |
|---|--------|--------|-----|--------|-------|--------|
| 1 | 28.758 | 218.6  | 5.7 | 0.4958 | 1.081 | 5.838  |
| 2 | 30.473 | 3525.7 | 81  | 0.676  | 0.83  | 94.162 |

| Ret Time | Area/mAU | Area/% |
|----------|----------|--------|
| 28.75    | 218.6    | 5.838  |
| 30.47    | 3525.7   | 94.162 |

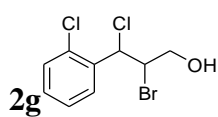

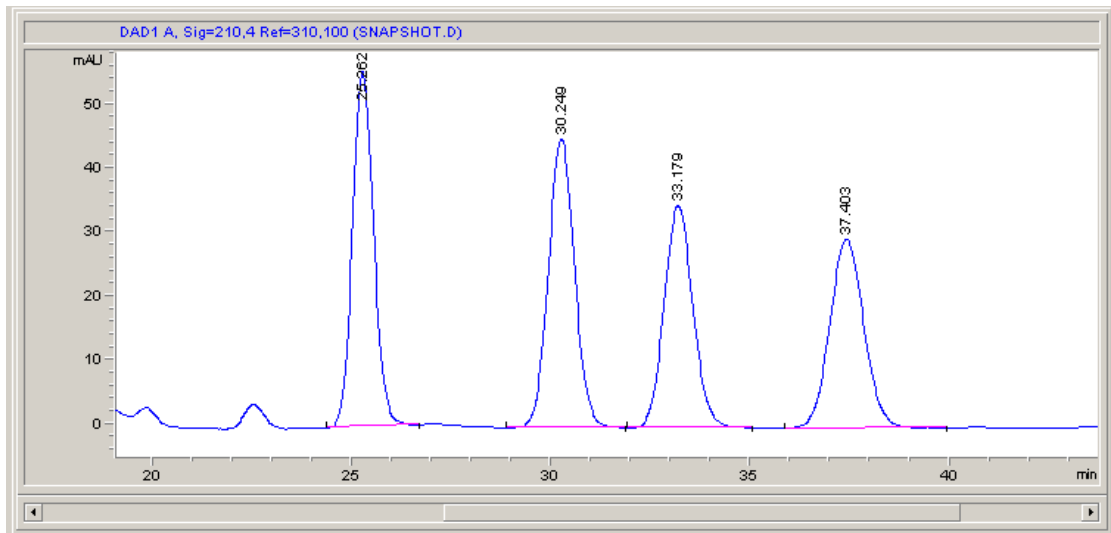

| Ret Time | Area/mAU | Area/% |
|----------|----------|--------|
| 25.26    | 2058.2   | 49.796 |
| 30.25    | 2075     | 50.02  |

**method A**

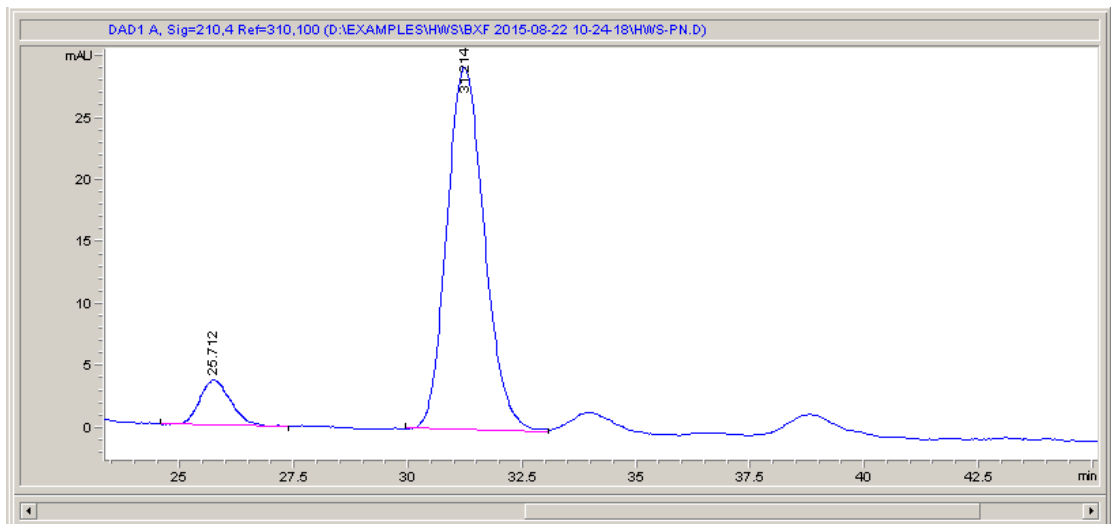

| # | 时间     | 峰面积    | 峰高   | 峰宽     | 对称因子  | 峰面积 %  |
|---|--------|--------|------|--------|-------|--------|
| 1 | 25.712 | 173.1  | 3.6  | 0.7119 | 0.789 | 9.318  |
| 2 | 31.214 | 1684.6 | 29.3 | 0.8913 | 0.831 | 90.682 |

| Ret Time | Area/mAU | Area/% |
|----------|----------|--------|
| 25.712   | 173.1    | 9.318  |
| 31.214   | 1684.6   | 90.682 |

**method B**

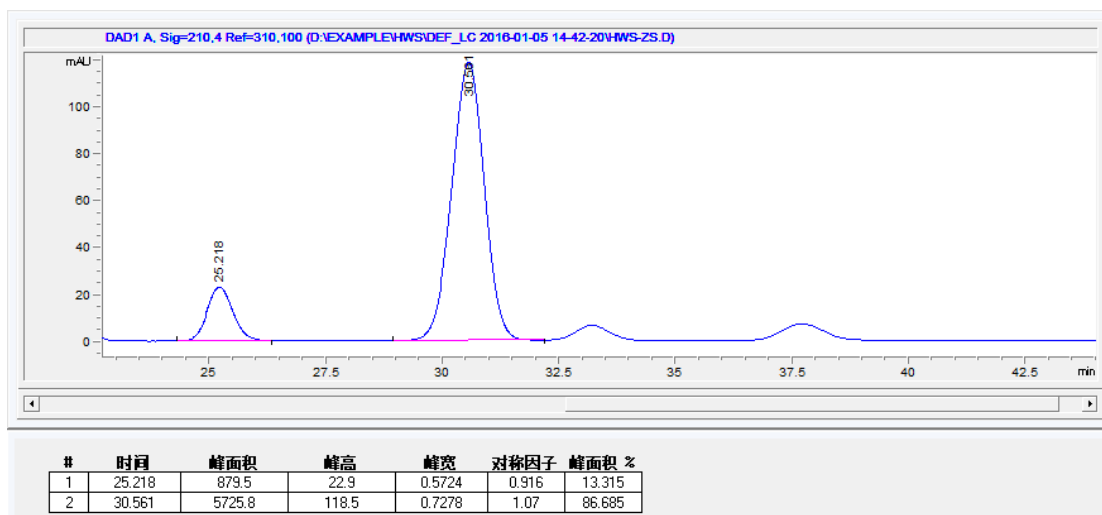

| Ret Time | Area/mAU | Area/% |
|----------|----------|--------|
| 25.218   | 879.5    | 13.313 |
| 31.561   | 5725.8   | 86.685 |

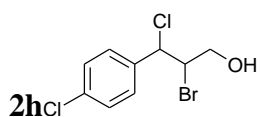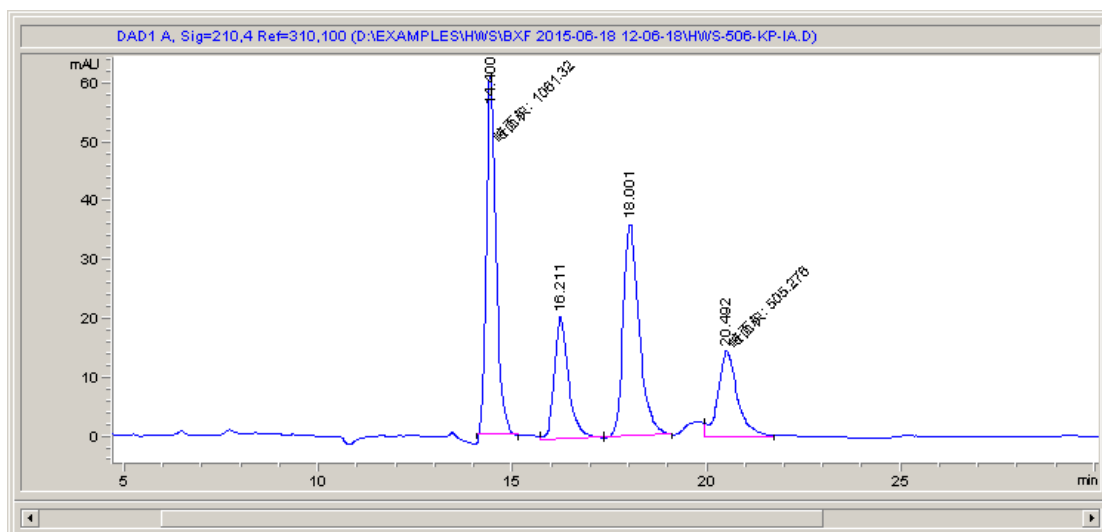

| Ret Time | Area/mAU | Area/% |
|----------|----------|--------|
| 14.4     | 1061.3   | 50.67  |
| 18.0     | 1033.2   | 49.33  |

method A

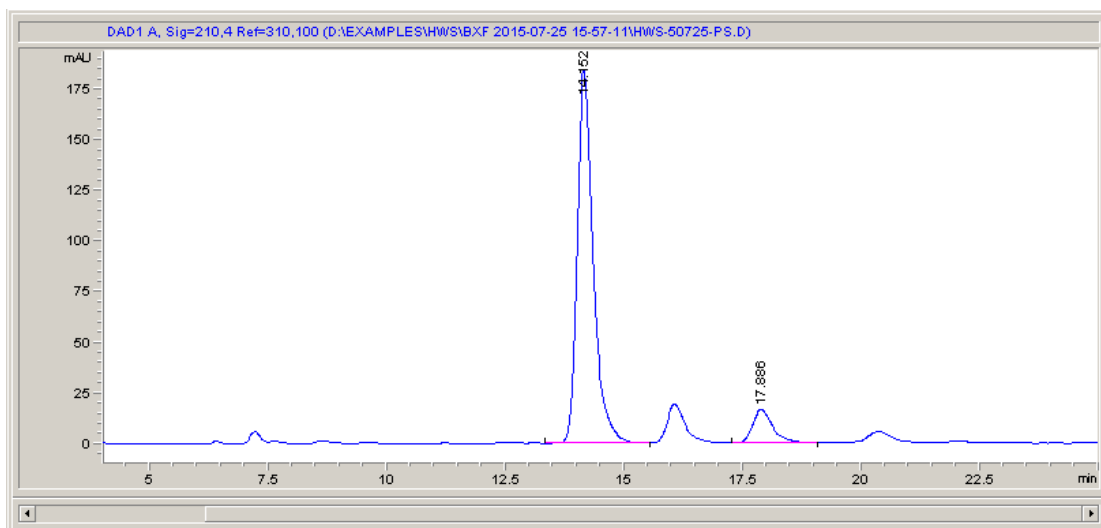

| Ret Time | Area/mAU | Area/% |
|----------|----------|--------|
| 14.152   | 4328.4   | 89.786 |
| 17.886   | 492.4    | 10.214 |

**method B**

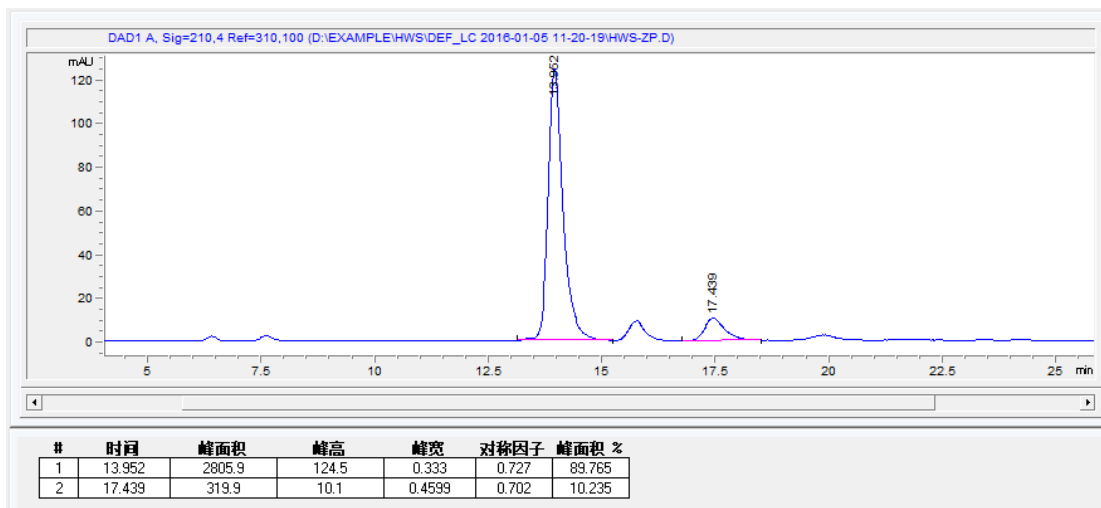

| # | 时间     | 峰面积    | 峰高    | 峰宽     | 对称因子  | 峰面积 %  |
|---|--------|--------|-------|--------|-------|--------|
| 1 | 13.952 | 2805.9 | 124.5 | 0.333  | 0.727 | 89.765 |
| 2 | 17.439 | 319.9  | 10.1  | 0.4599 | 0.702 | 10.235 |

| Ret Time | Area/mAU | Area/% |
|----------|----------|--------|
| 13.952   | 2805.9   | 89.765 |
| 17.439   | 319.9    | 10.235 |

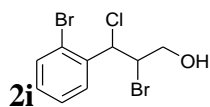



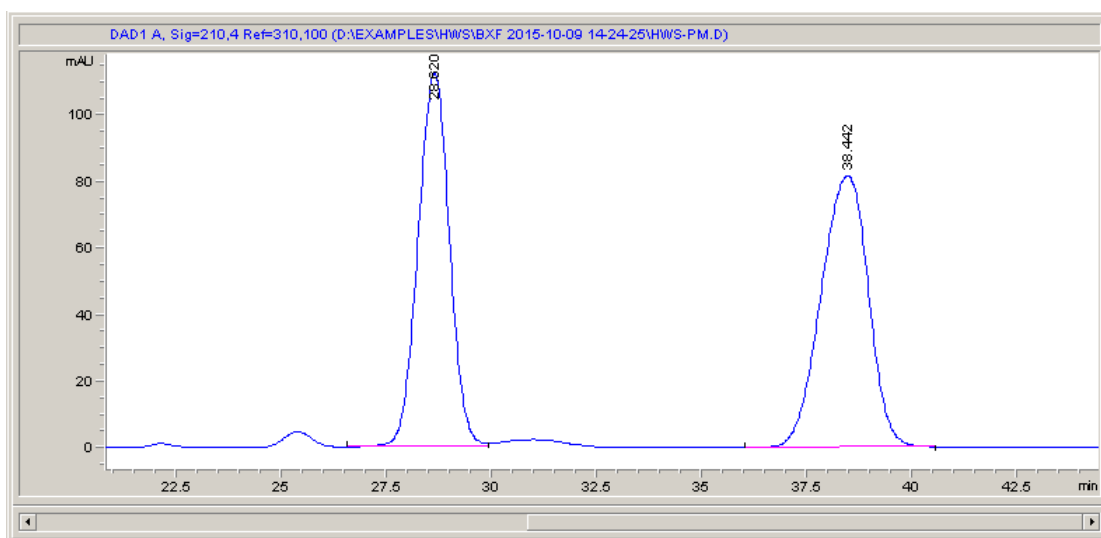

| Ret Time | Area/mAU | Area/% |
|----------|----------|--------|
| 28.62    | 5830.3   | 47.728 |
| 38.44    | 6385.3   | 52.272 |

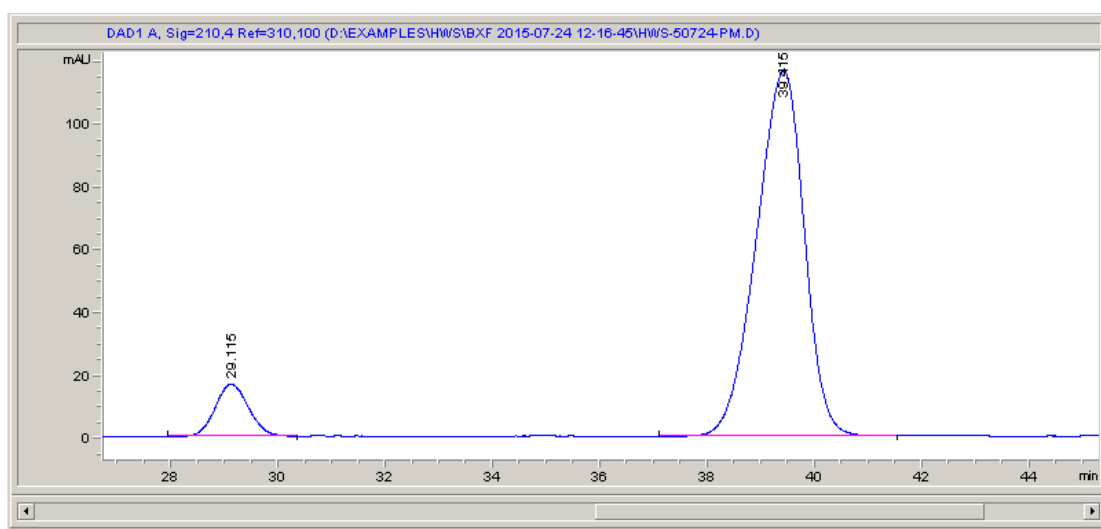

| Ret Time | Area/mAU | Area/% |
|----------|----------|--------|
| 29.115   | 719.6    | 9.073  |
| 39.415   | 7211.9   | 90.927 |

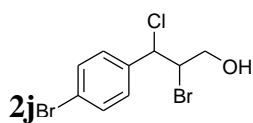

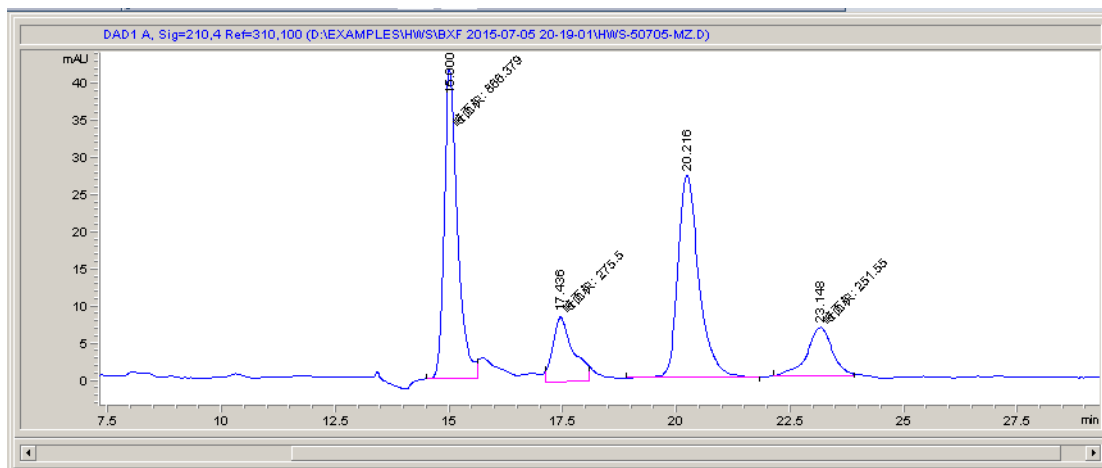

| Ret Time | Area/mAU | Area/% |
|----------|----------|--------|
| 15.0     | 866.4    | 49.753 |
| 20.22    | 875      | 50.246 |

**method A**

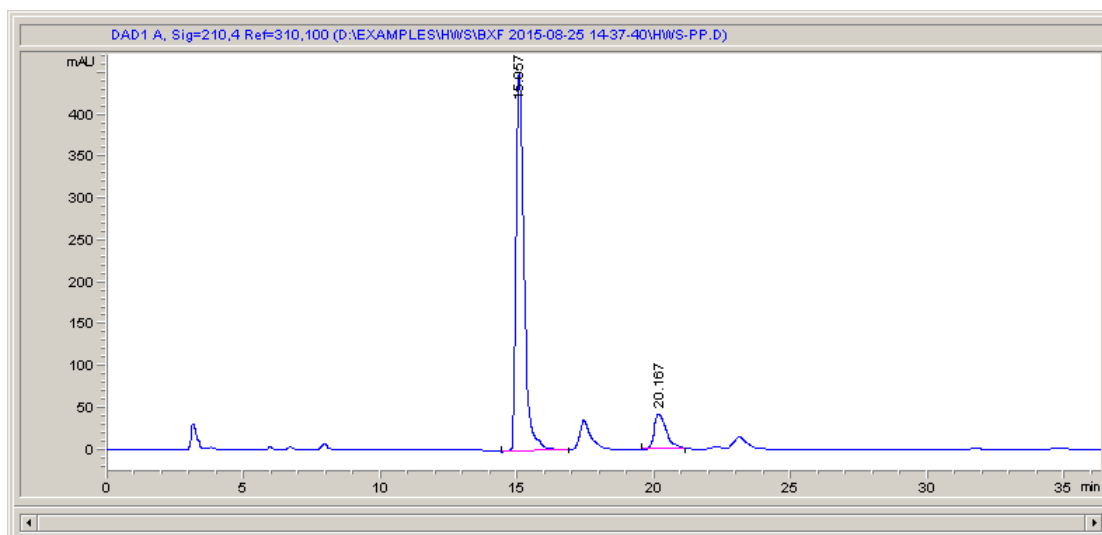

| Ret Time | Area/mAU | Area/% |
|----------|----------|--------|
| 15.057   | 8914.7   | 87.451 |
| 20.167   | 1279.3   | 12.549 |

**method B**

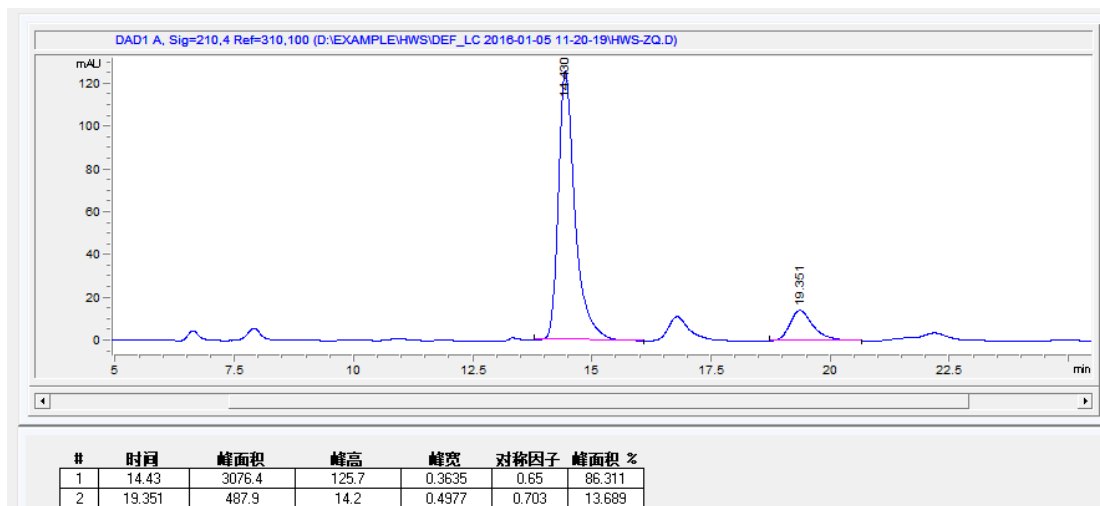

| Ret Time | Area/mAU | Area/% |
|----------|----------|--------|
| 14.43    | 3076.4   | 86.311 |
| 19.35    | 487.9    | 13.689 |

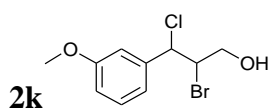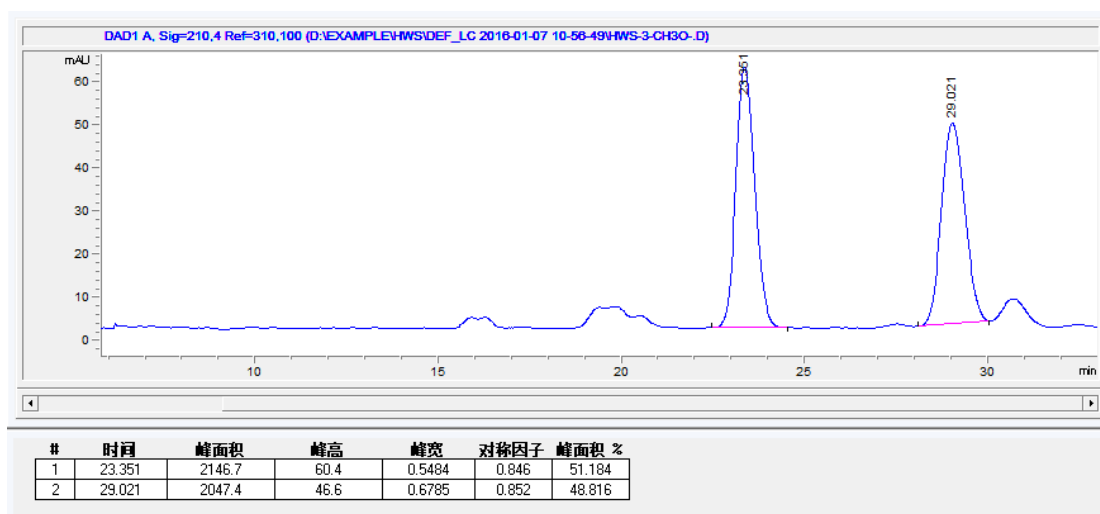

| Ret Time | Area/mAU | Area/% |
|----------|----------|--------|
| 23.35    | 2146.7   | 51.184 |
| 29.02    | 2047.4   | 48.816 |

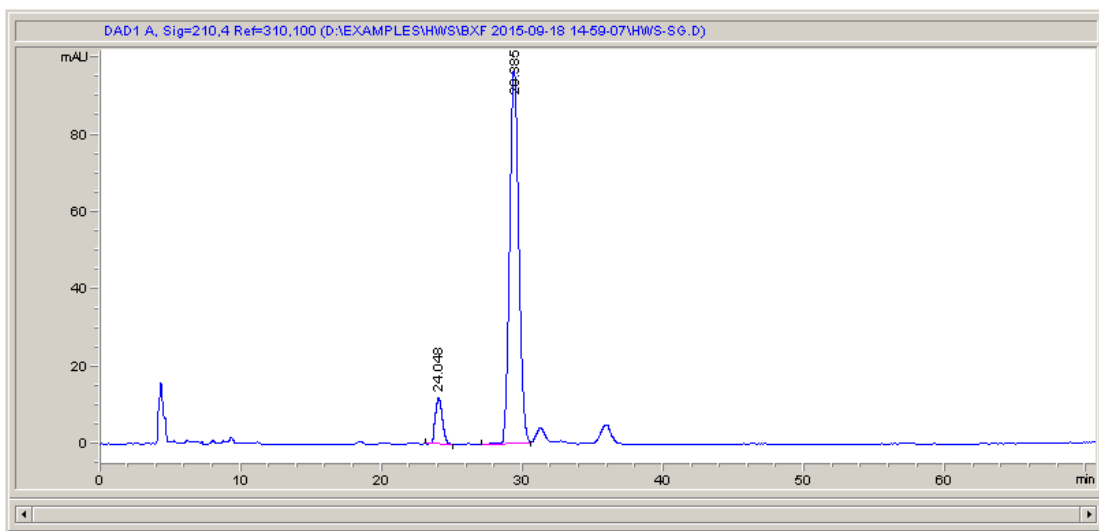

| Ret Time | Area/mAU | Area/% |
|----------|----------|--------|
| 24.048   | 421.1    | 9.03   |
| 29.385   | 4242.4   | 90.97  |

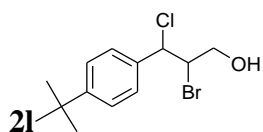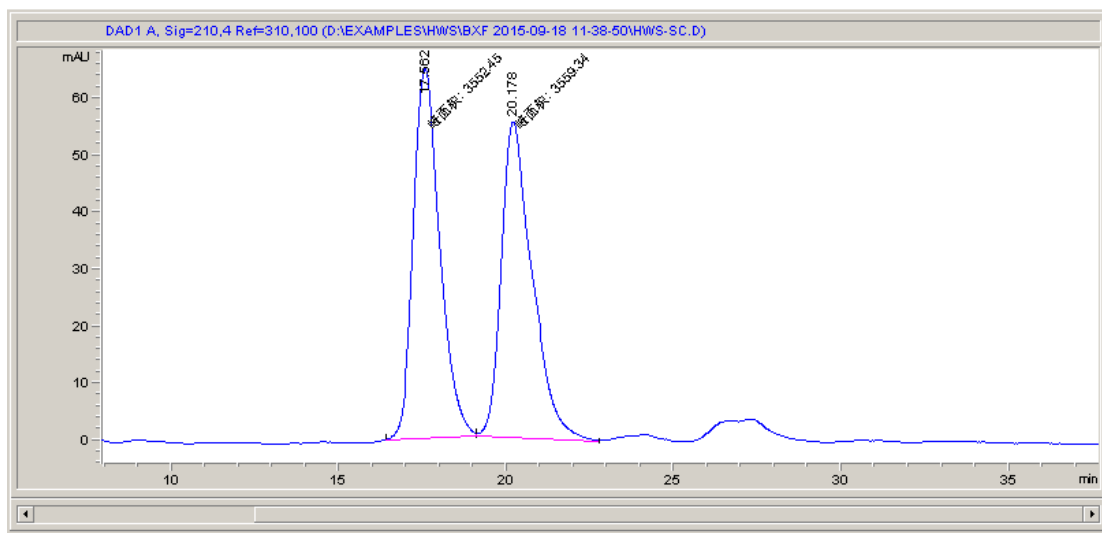

| Ret Time | Area/mAU | Area/% |
|----------|----------|--------|
| 17.56    | 3552.4   | 49.952 |
| 20.17    | 3559.3   | 50.048 |

method A

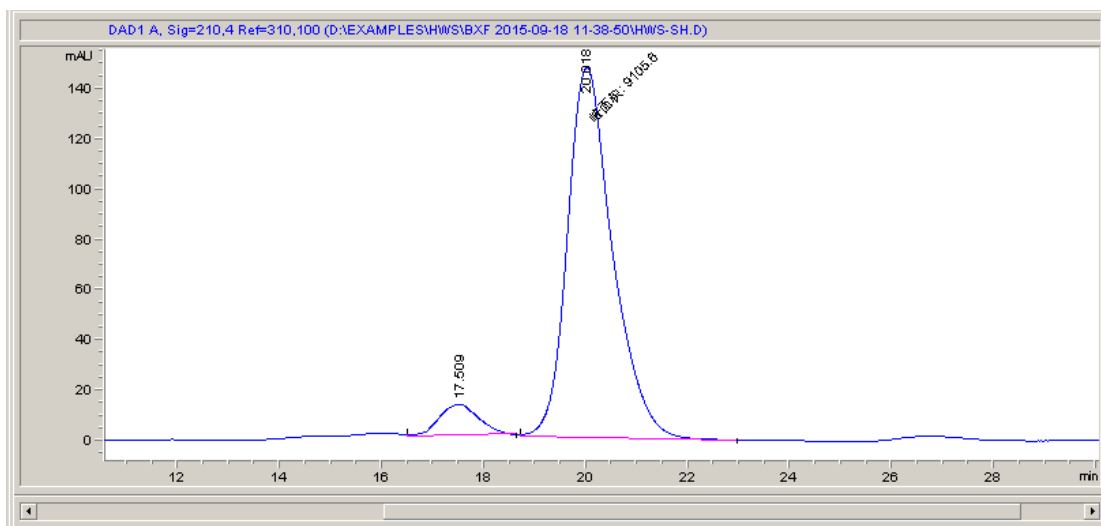

| Ret Time | Area/mAU | Area/% |
|----------|----------|--------|
| 17.509   | 693      | 7.073  |
| 20.018   | 9105.6   | 92.927 |

**method B**

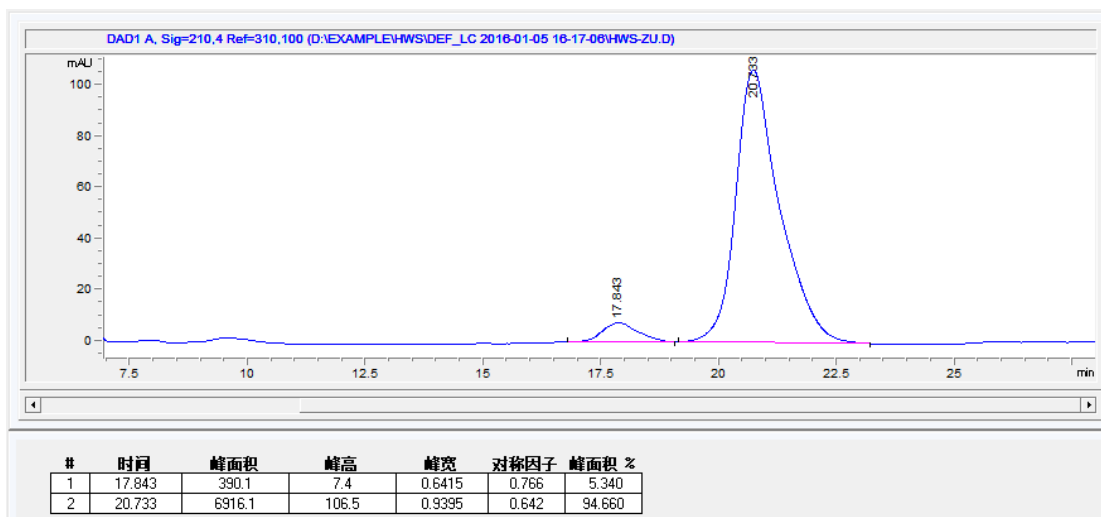

| # | 时间     | 峰面积    | 峰高    | 峰宽     | 对称因子  | 峰面积 %  |
|---|--------|--------|-------|--------|-------|--------|
| 1 | 17.843 | 390.1  | 7.4   | 0.6415 | 0.766 | 5.340  |
| 2 | 20.733 | 6916.1 | 106.5 | 0.9395 | 0.642 | 94.660 |

| Ret Time | Area/mAU | Area/% |
|----------|----------|--------|
| 17.843   | 390      | 5.34   |
| 20.733   | 6916.1   | 94.66  |

**2m**

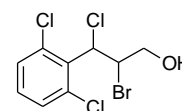

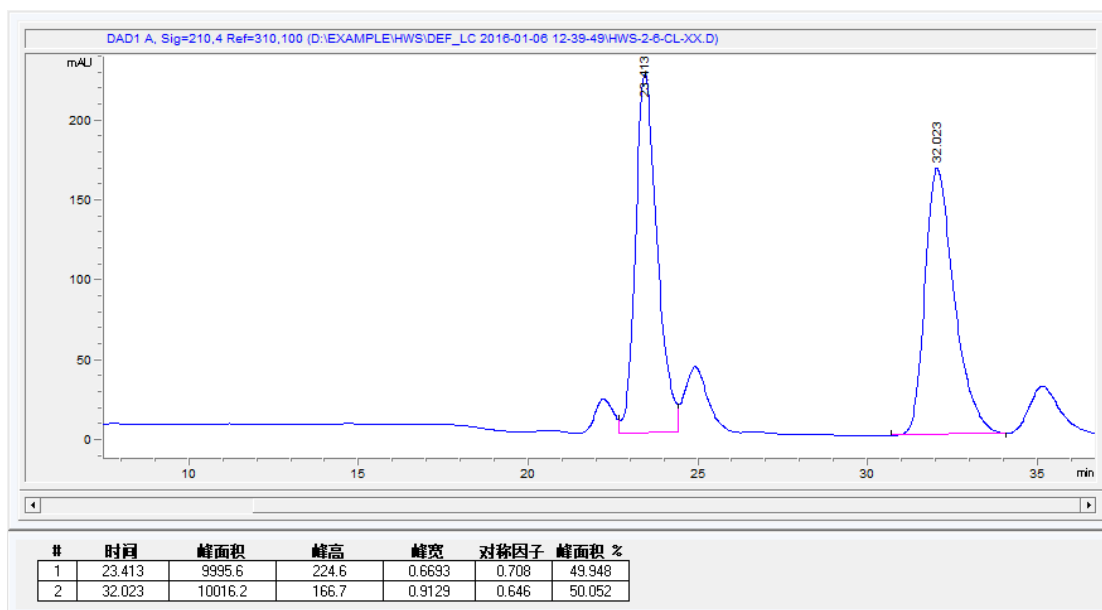

| Ret Time | Area/mAU | Area/% |
|----------|----------|--------|
| 23.413   | 9995.6   | 49.94  |
| 32.023   | 10016.2  | 50.05  |

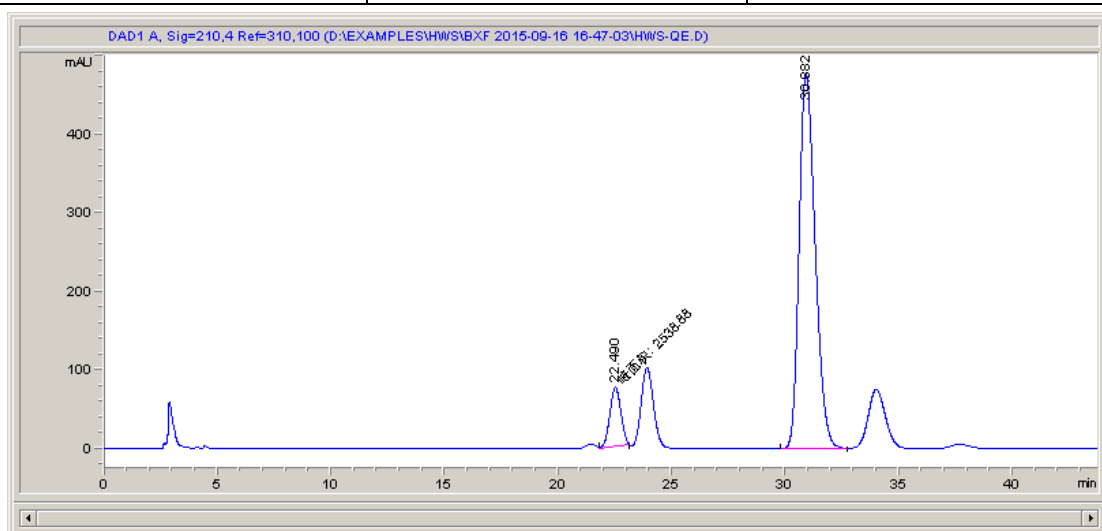

| Ret Time | Area/mAU | Area/% |
|----------|----------|--------|
| 22.49    | 2538.9   | 9.794  |
| 30.882   | 23383.3  | 90.206 |

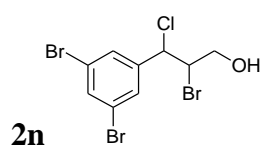

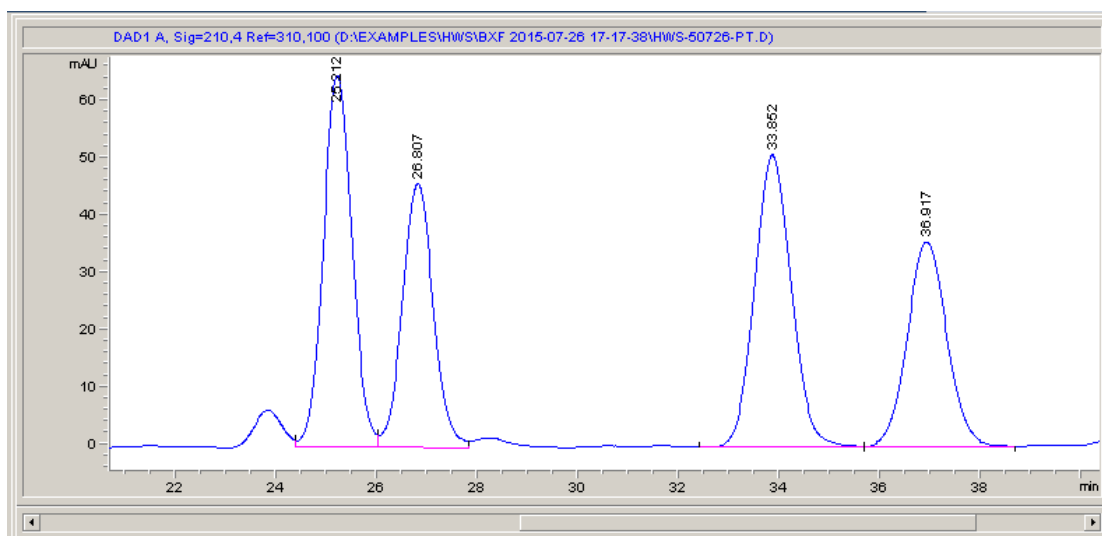

| Ret Time | Area/mAU | Area/% |
|----------|----------|--------|
| 24.13    | 5752     | 49.93  |
| 26.80    | 5766     | 50.06  |

**method A**

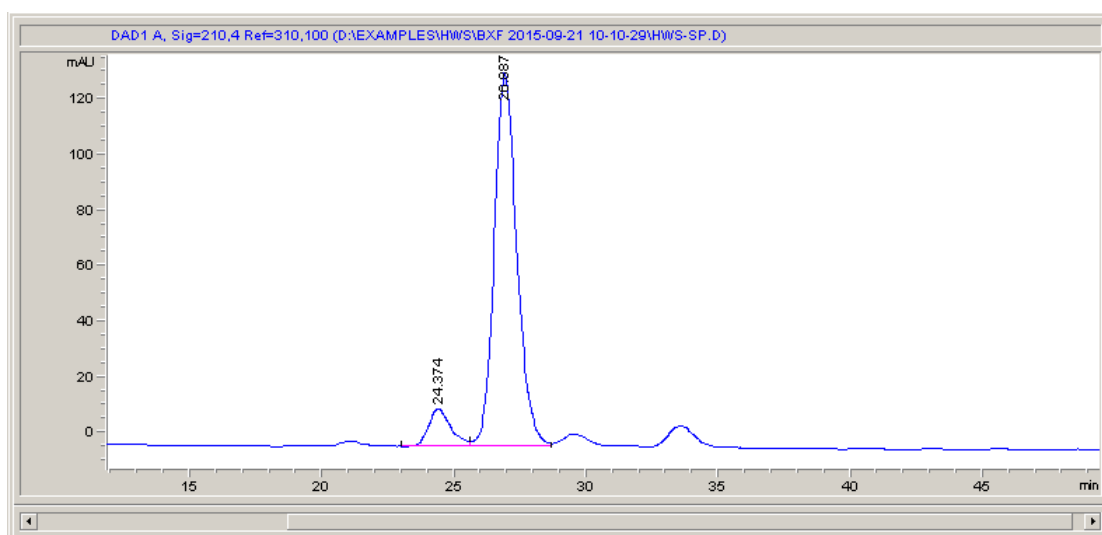

| Ret Time | Area/mAU | Area/% |
|----------|----------|--------|
| 24.374   | 801.7    | 9.08   |
| 26.887   | 8027.6   | 90.92  |

**method B**

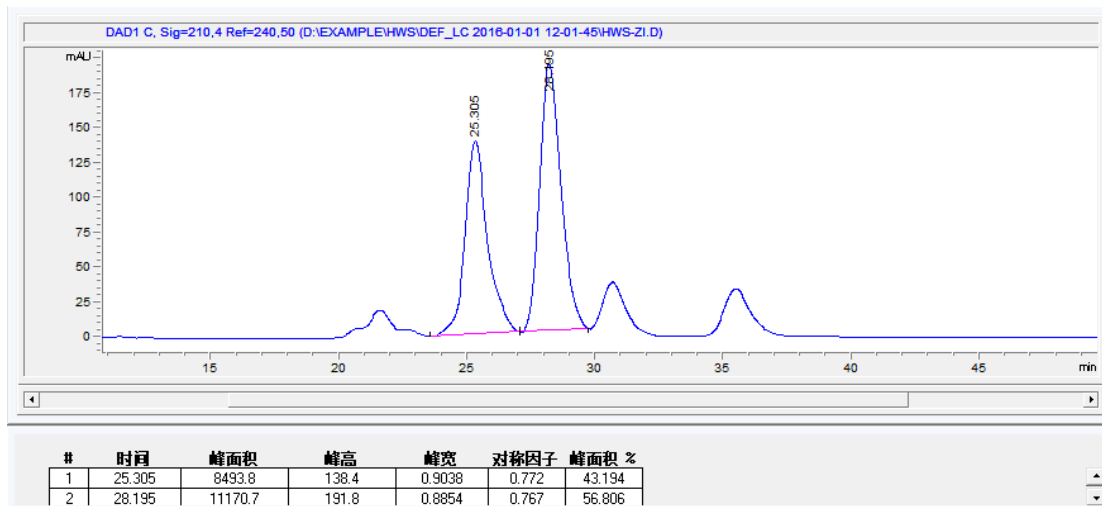

| Ret Time | Area/mAU | Area/% |
|----------|----------|--------|
| 25.305   | 8493.8   | 43.194 |
| 28.195   | 11170.7  | 56.806 |

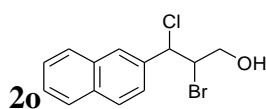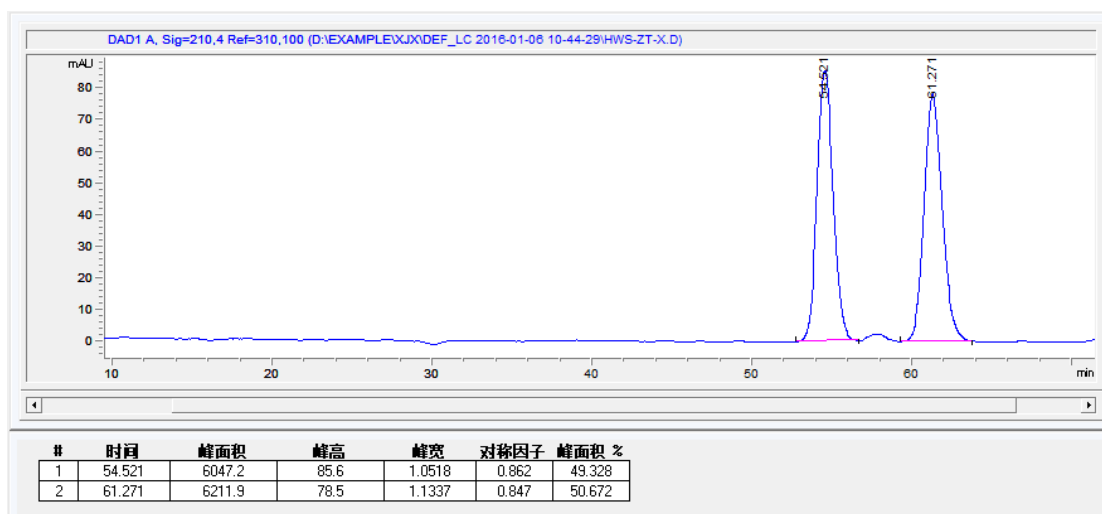

| Ret Time | Area/mAU | Area/% |
|----------|----------|--------|
| 54.521   | 6047.2   | 49.328 |
| 61.271   | 6211.9   | 50.672 |

method A



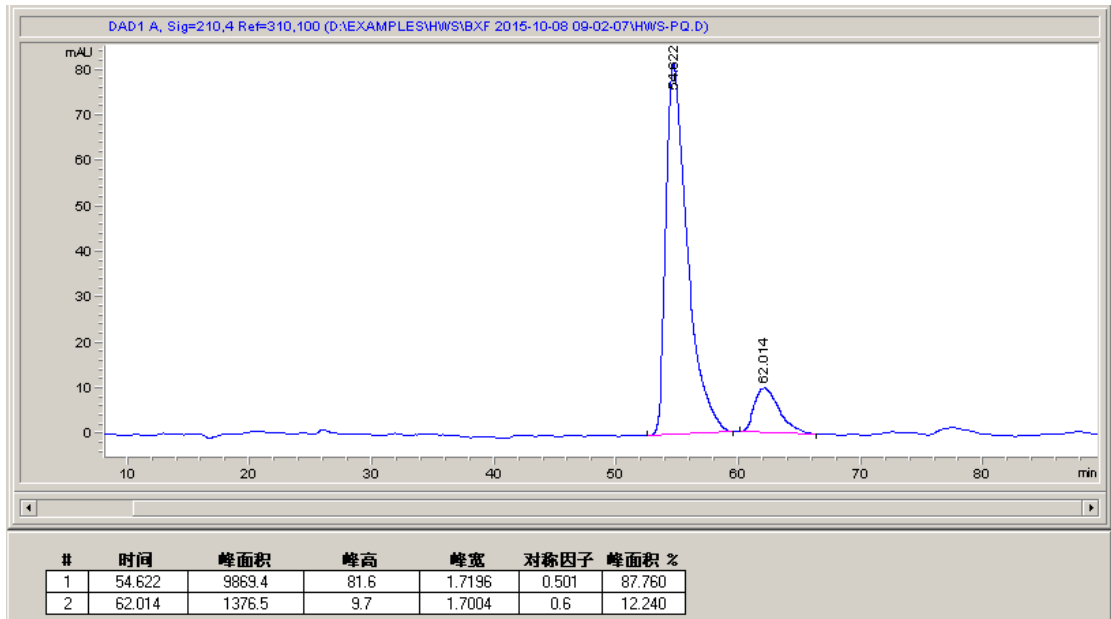

| Ret Time | Area/mAU | Area/% |
|----------|----------|--------|
| 54.622   | 9869.4   | 87.76  |
| 62.014   | 1376.5   | 12.24  |

**method B**

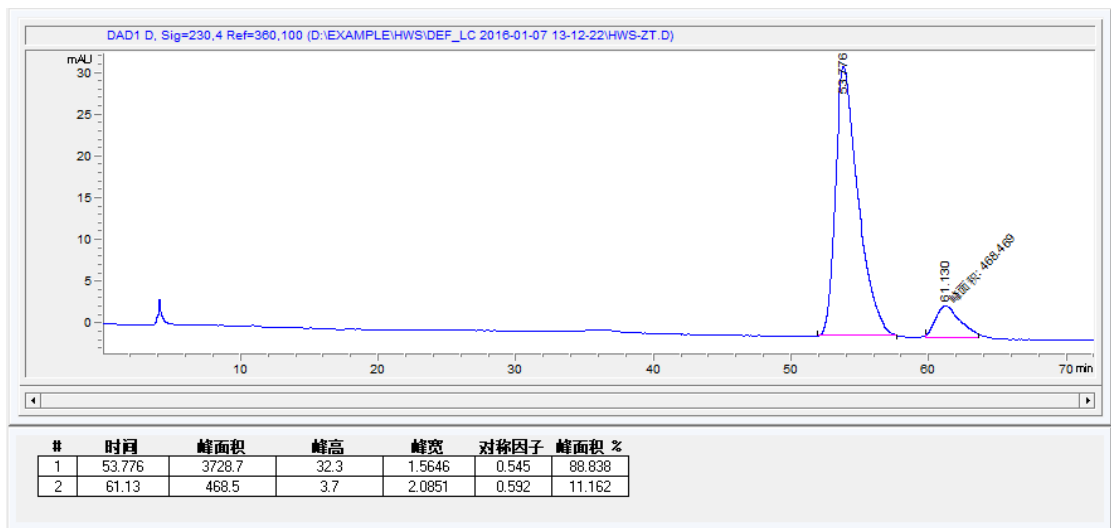

| Ret Time | Area/mAU | Area/% |
|----------|----------|--------|
| 53.776   | 3728.7   | 88.838 |
| 61.13    | 468.5    | 11.162 |

## Mass spectrum of Di-halide Products.

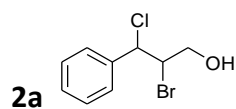

丰度

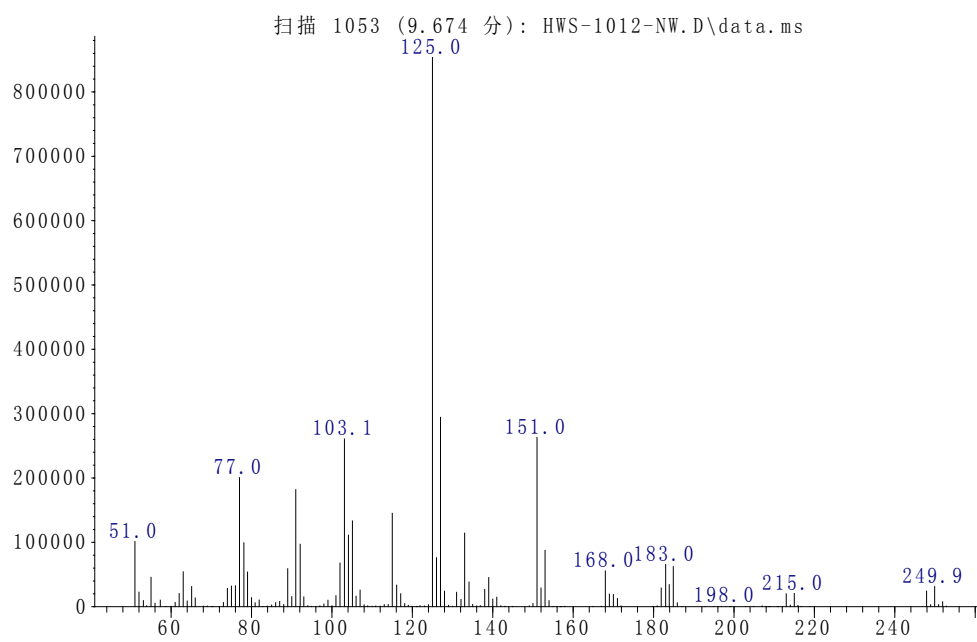

m/z-->

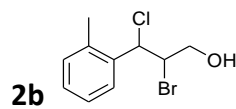

丰度

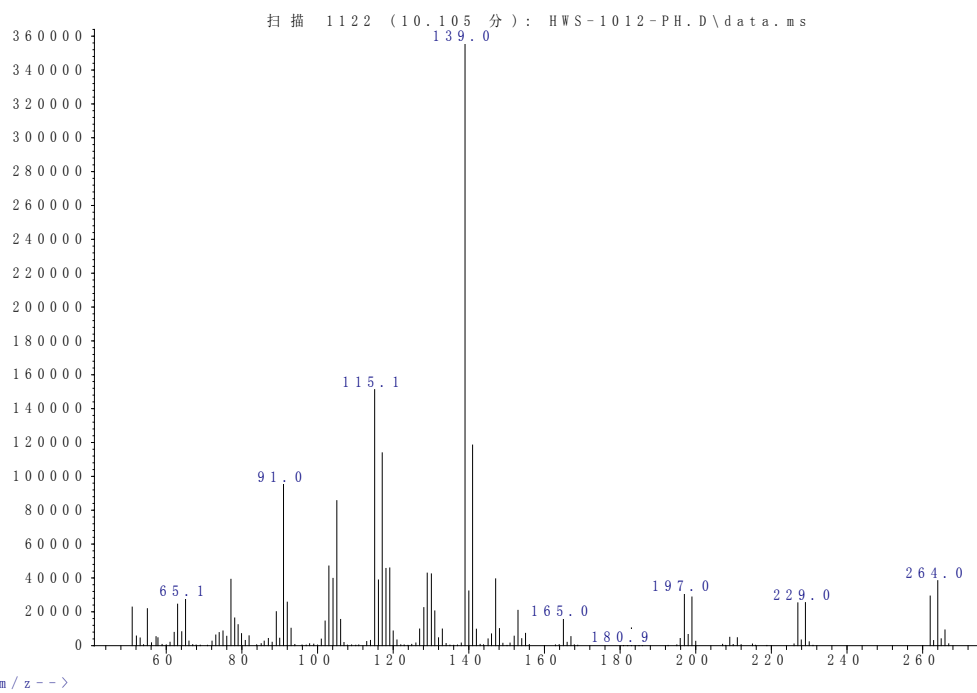

2c

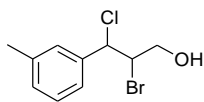

丰度

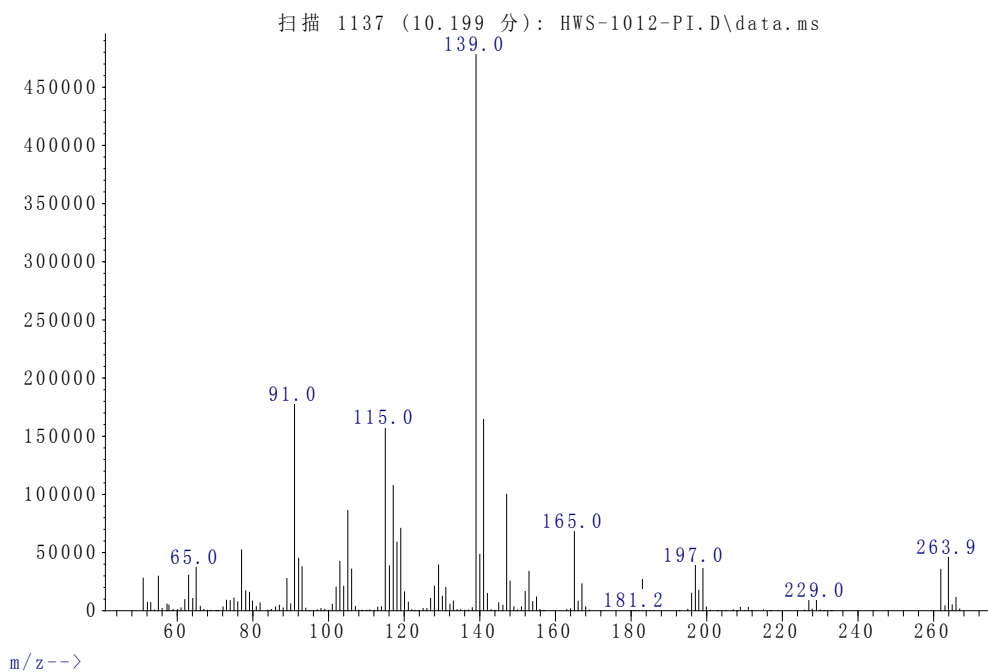

2d

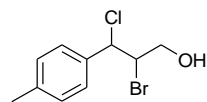

丰度

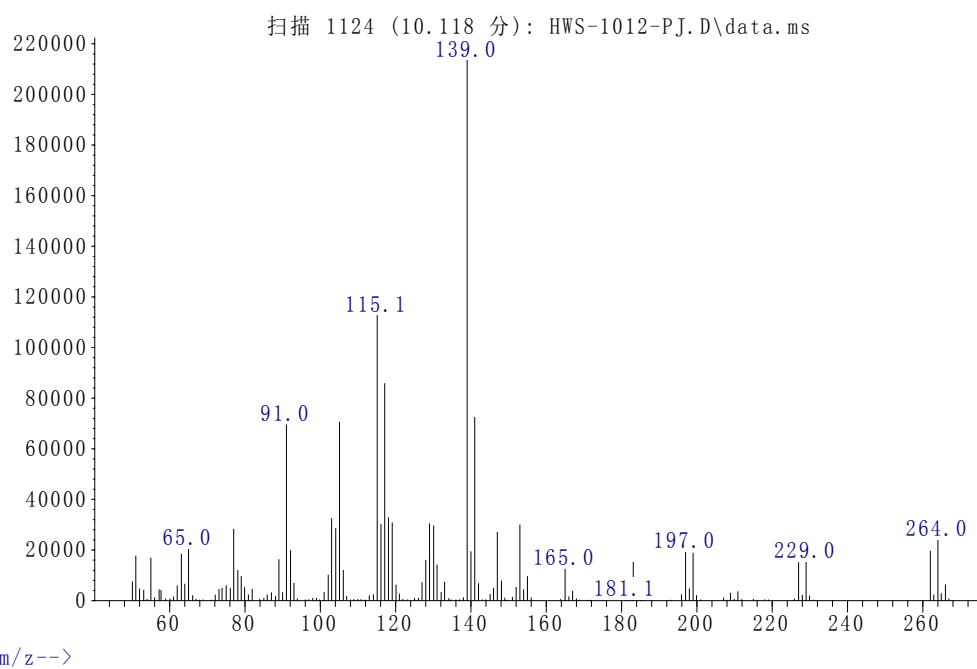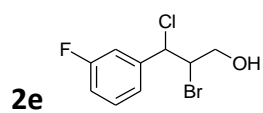

丰度

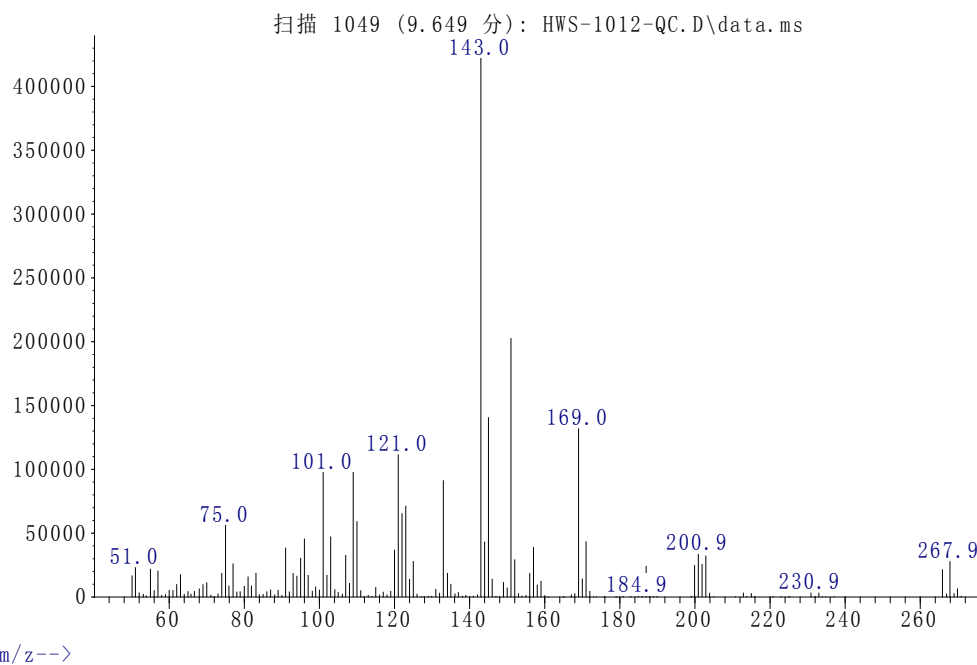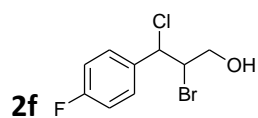

丰度

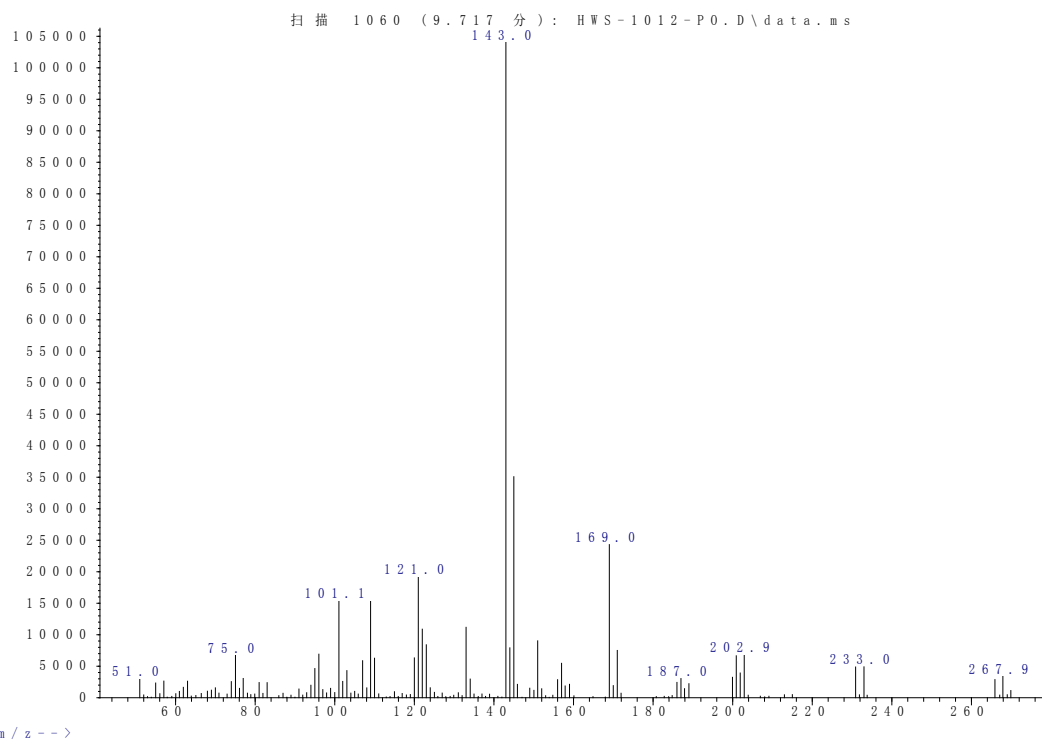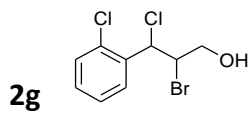

丰度

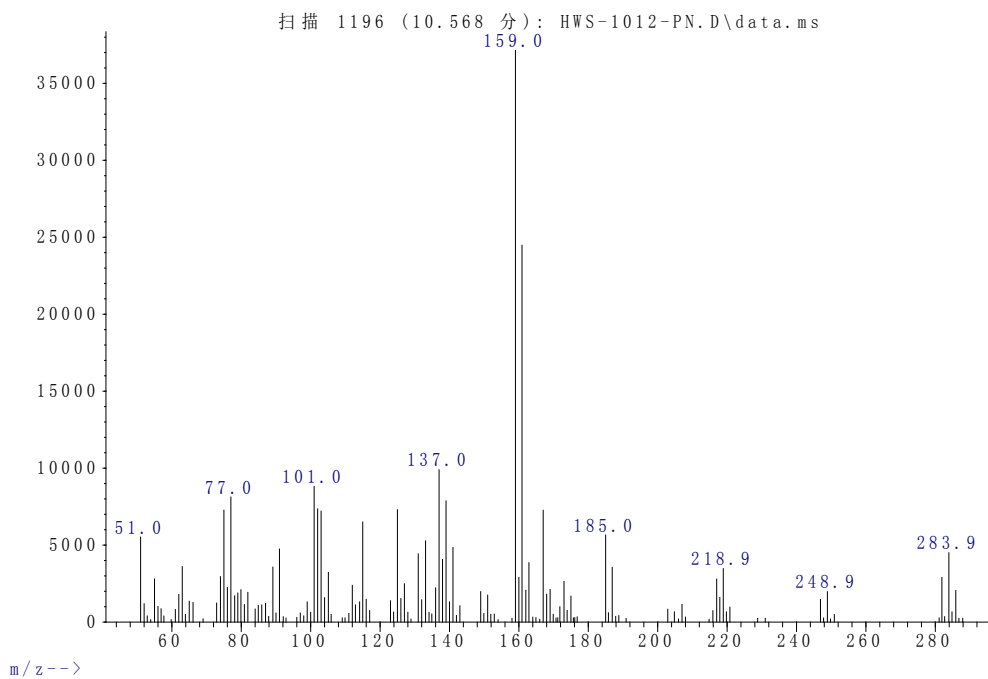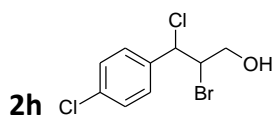

丰度

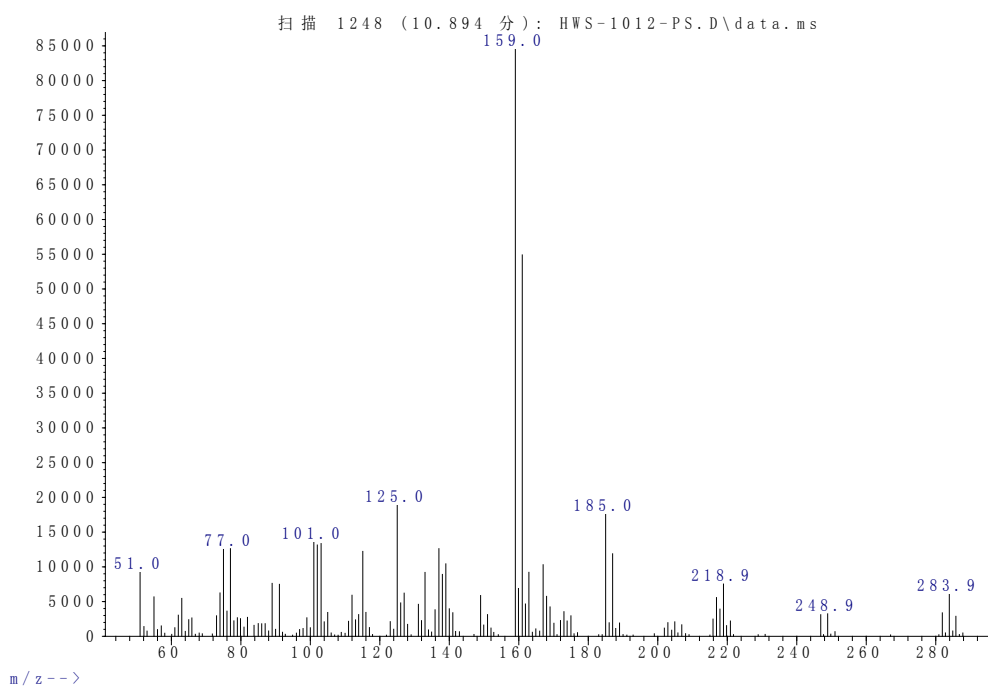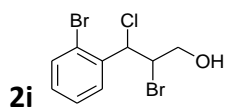

丰度

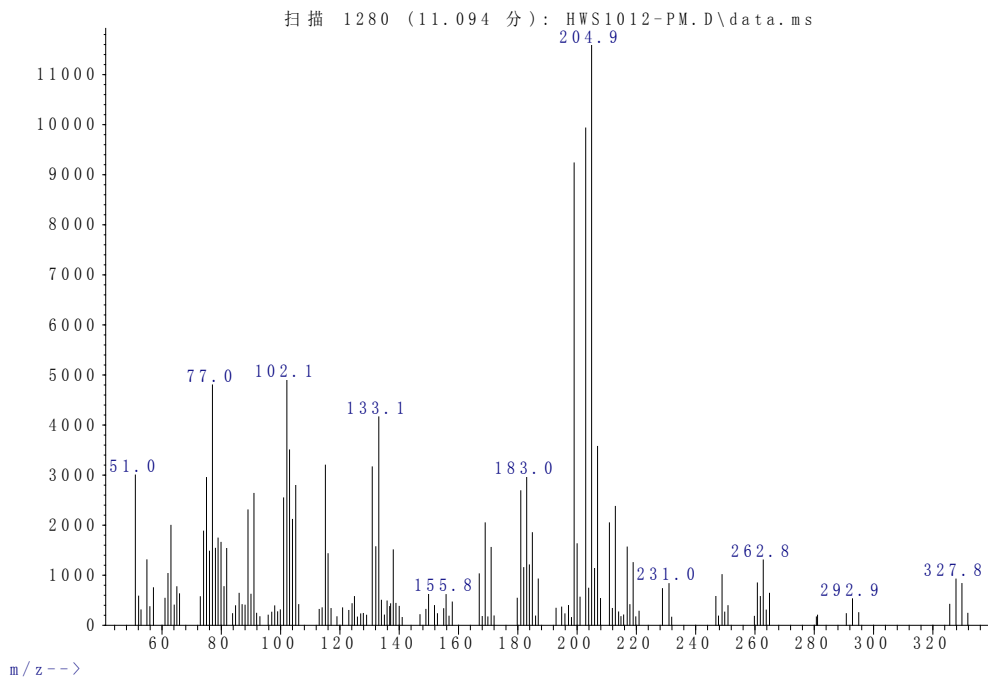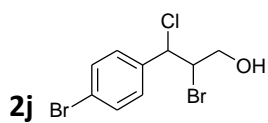

丰度

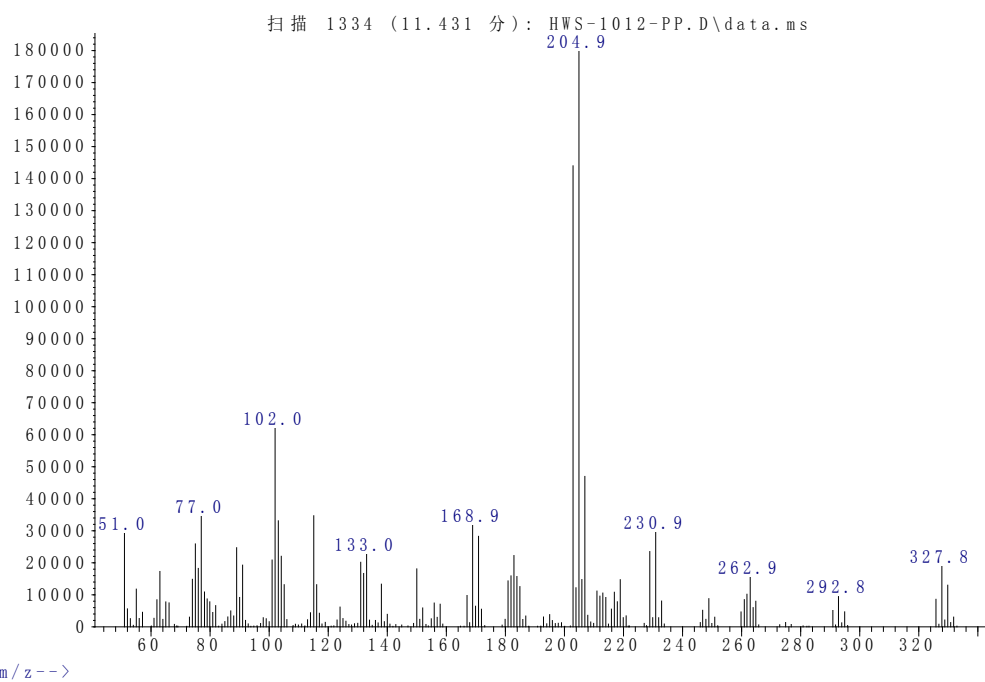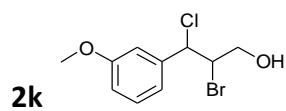

丰度

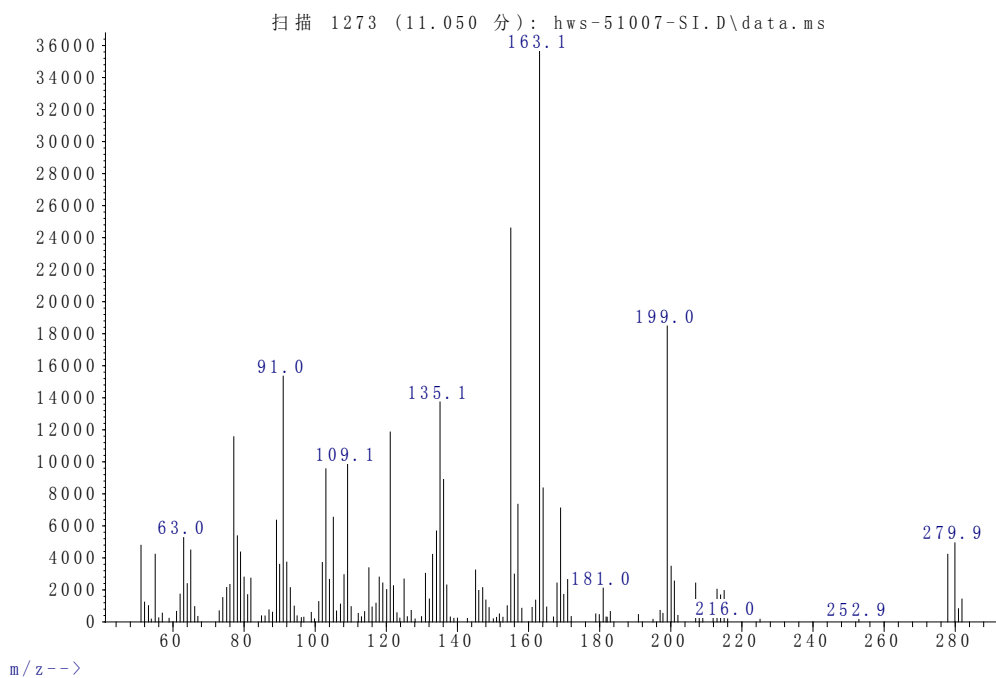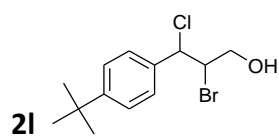

丰度

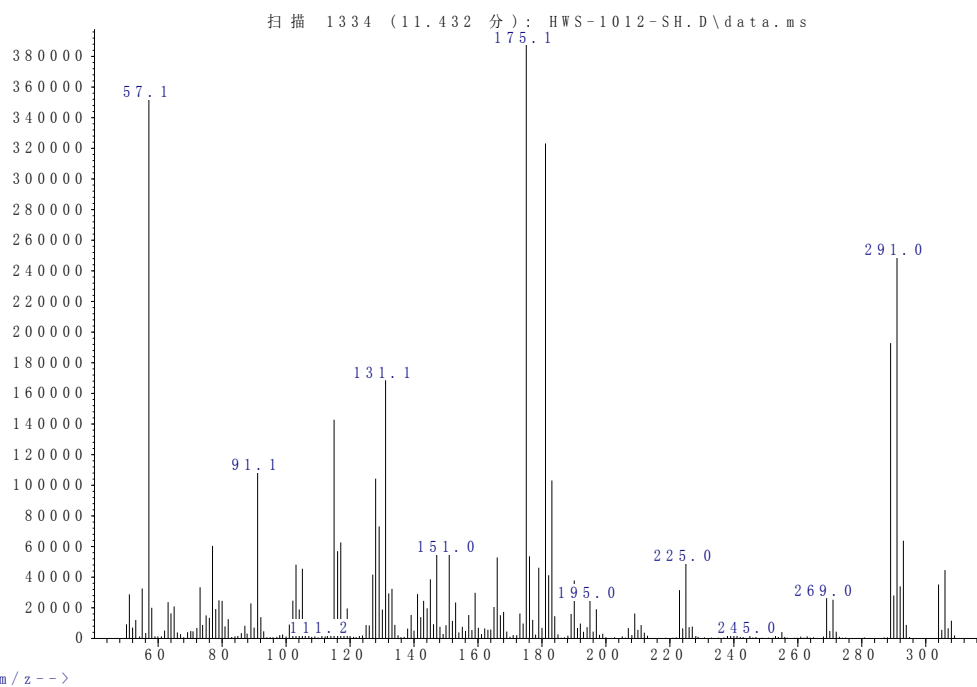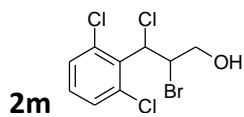

丰度

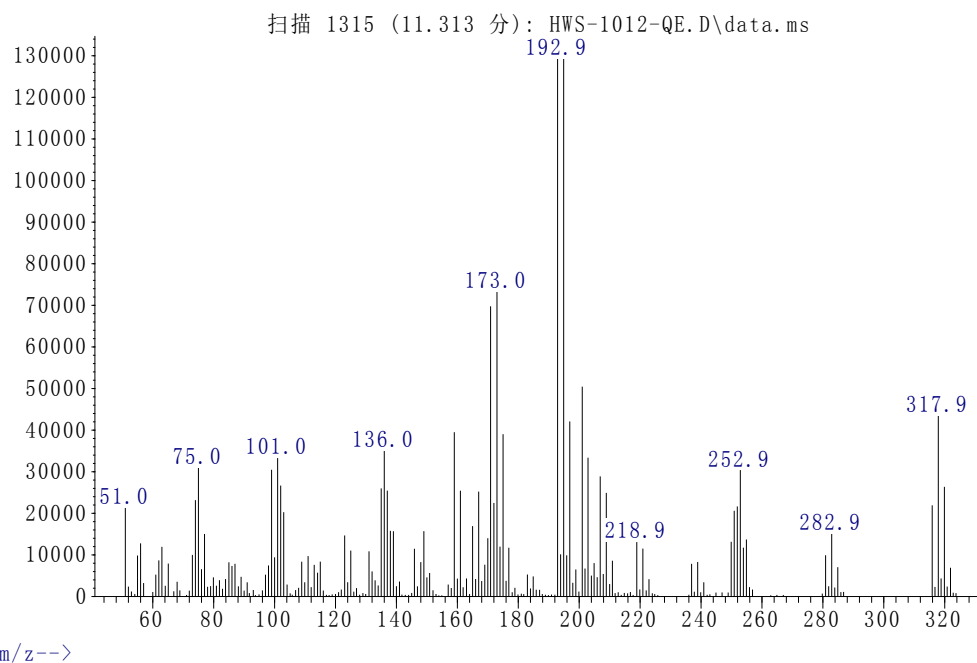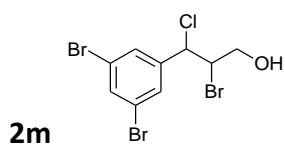



丰度

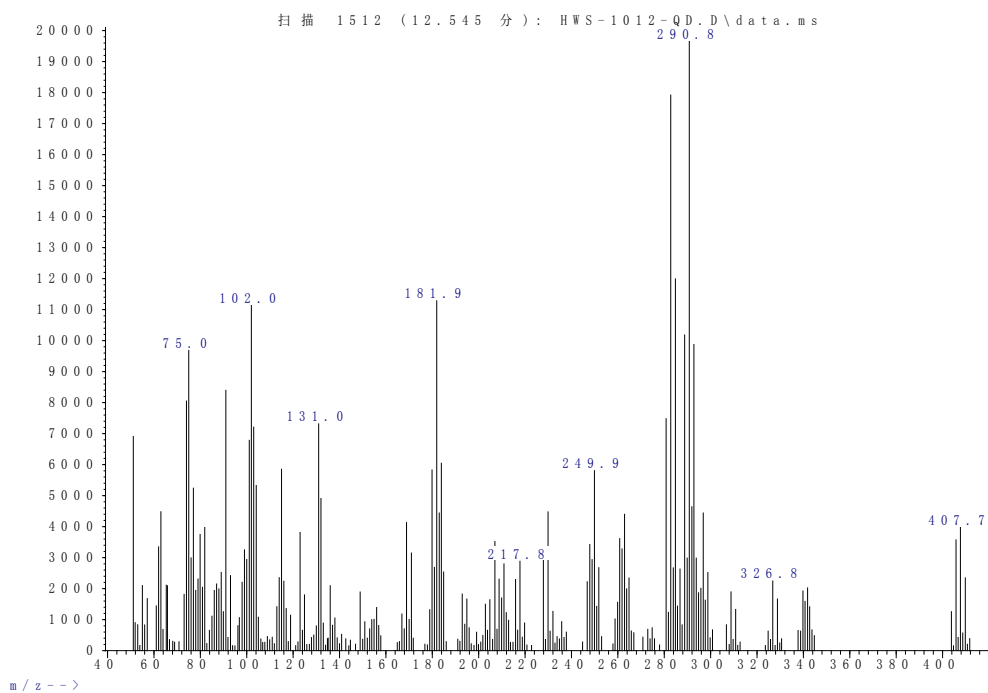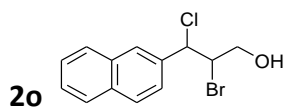

丰度

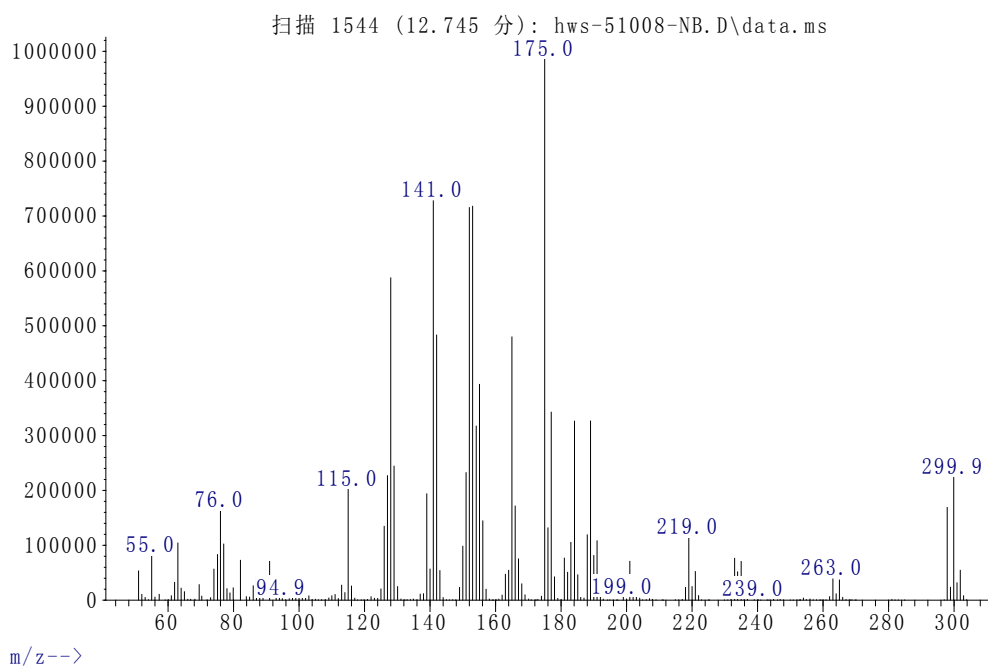

PS.

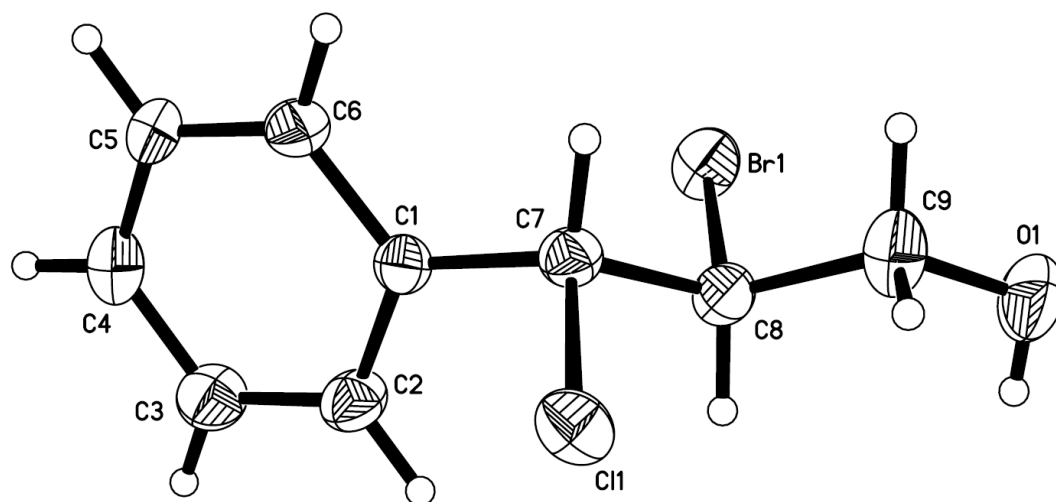

X-ray structure of product 2a
